# Supplementary material for: Vertical structure of a springtime smoky and humid troposphere over the Southeast Atlantic from aircraft and reanalysis
Source: Copernicus journal article supplement (doi:10.5194/egusphere-2023-2412), 2023-11-22
Supplement: Supplementary file 1 [file egusphere-2023-2412-supplement.pdf]

## Supplementary Material

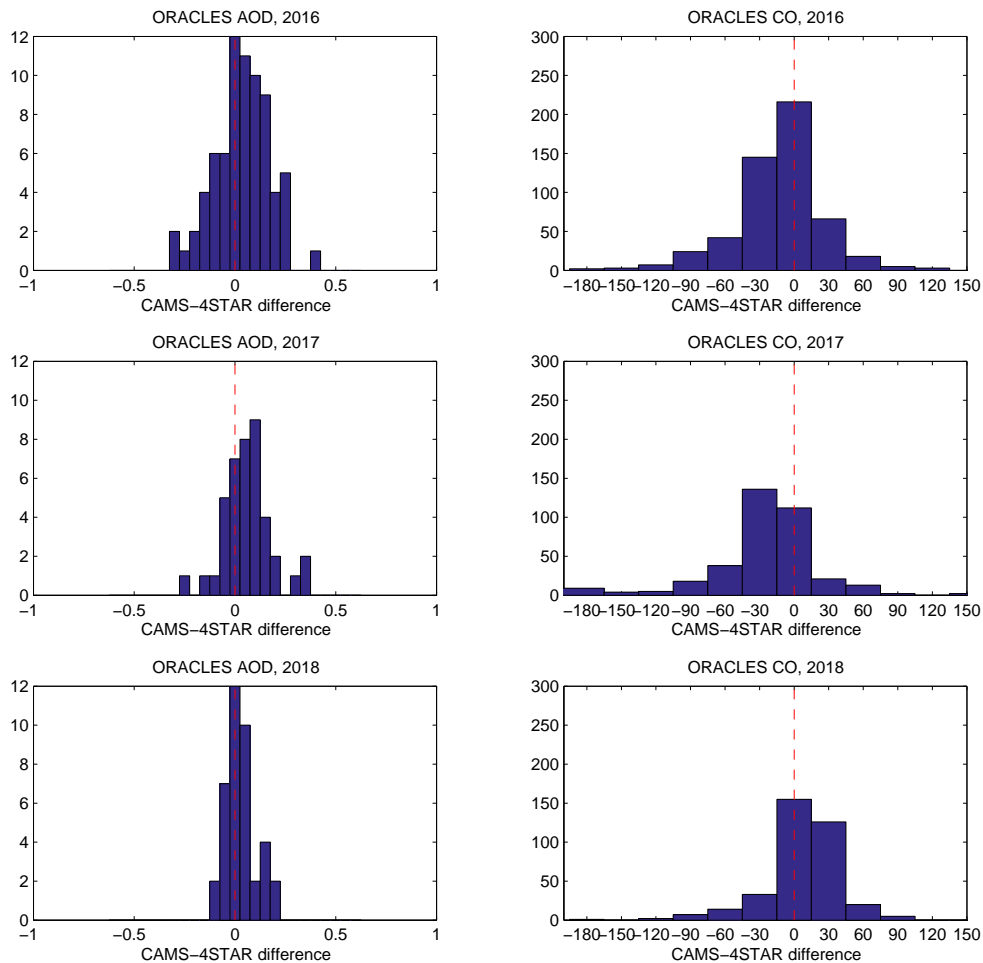

**Figure S1.** Difference between (left) CAMS BB AODs and ORACLES 4STAR-reported AODs and (right) CAMS CO and ORACLES COMA-measured CO for each deployment, taken at the subsets shown in Figure 6. The majority of the AODs are within  $\pm 0.2$  of one another; CAMS tends to overestimate AOD relative to 4STAR. In contrast, CAMS tends to underestimate CO relative to the observations, except in October.

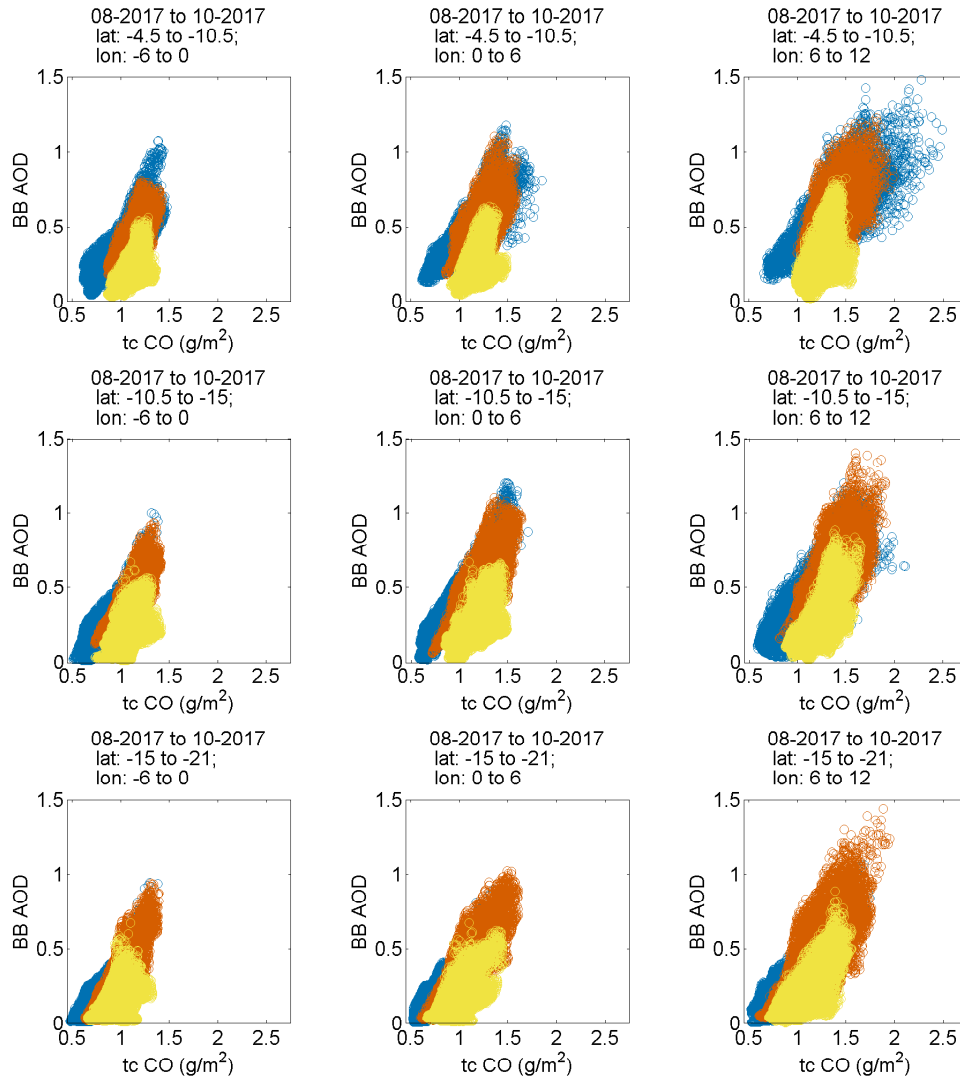

**Figure S2.** Gridded CAMS column total column carbon monoxide versus column biomass burning AOD (organics + BC) for 2017. August (blue) has a less steep slope than October (yellow) with September (orange) intermediate, showing the seasonal evolution of column values.

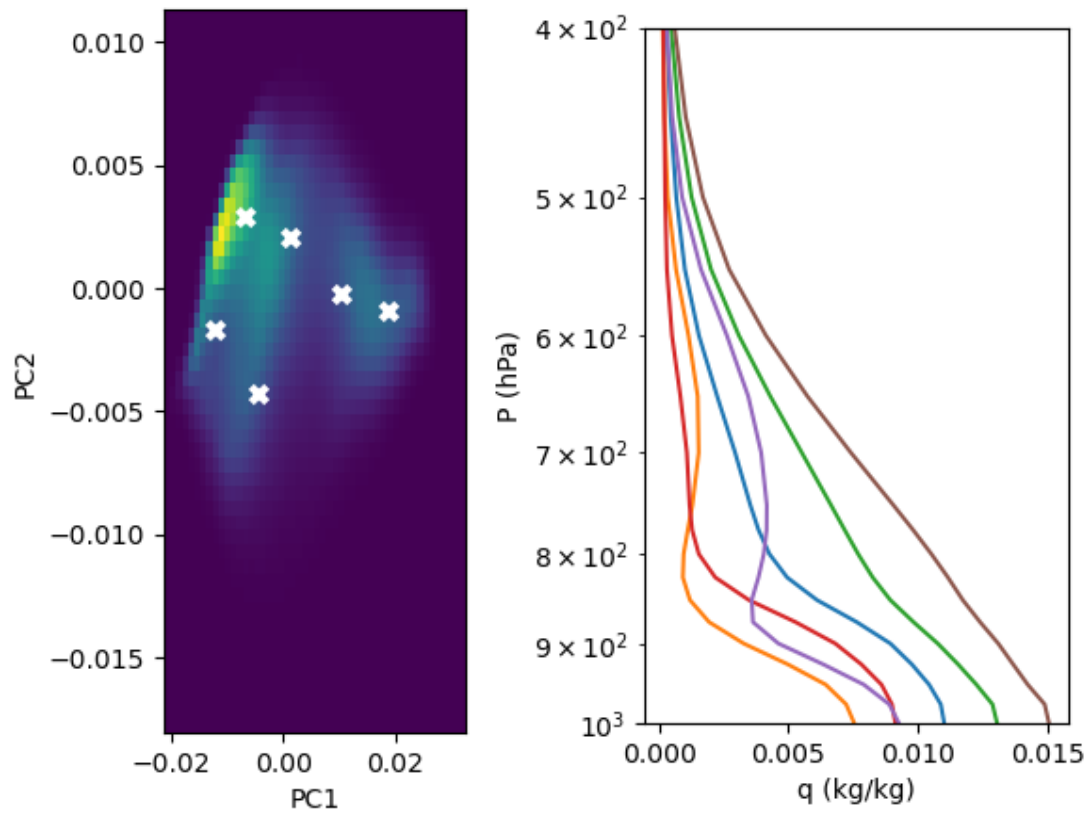

**Figure S3.** k-means clustering used to identify the canonical water vapor profiles of Figure 7.

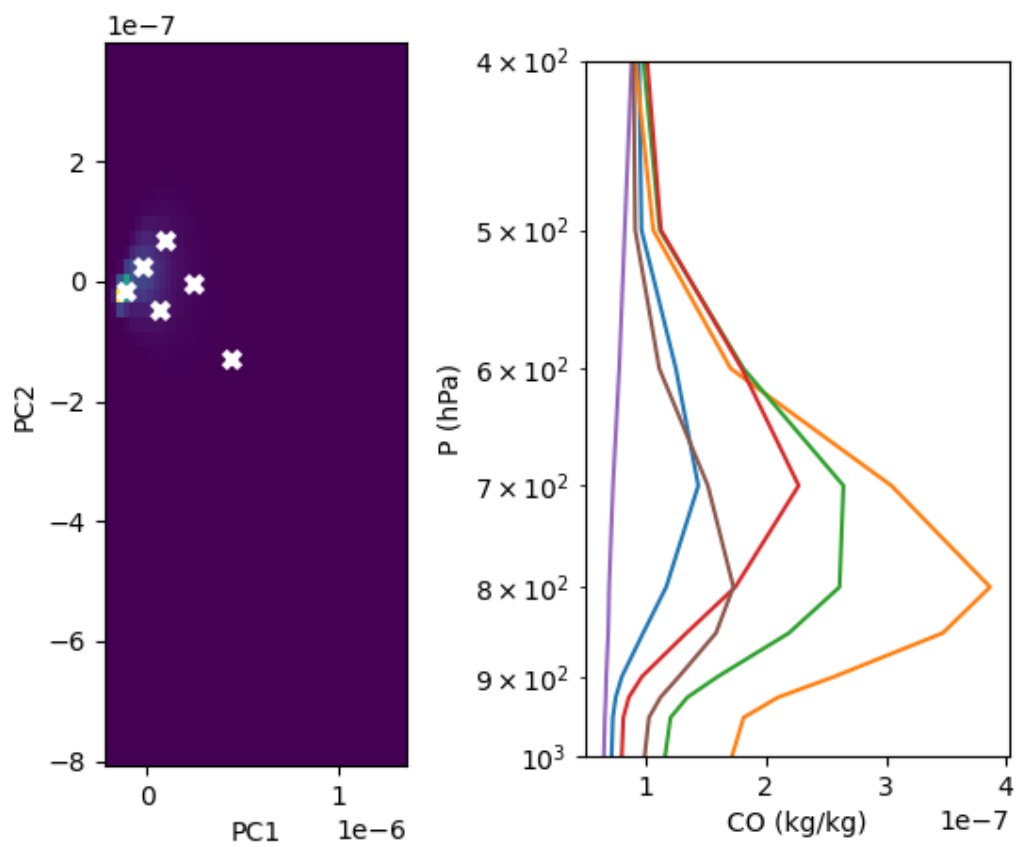

**Figure S4.** k-means clustering used to identify the canonical carbon monoxide profiles of Figure 8.

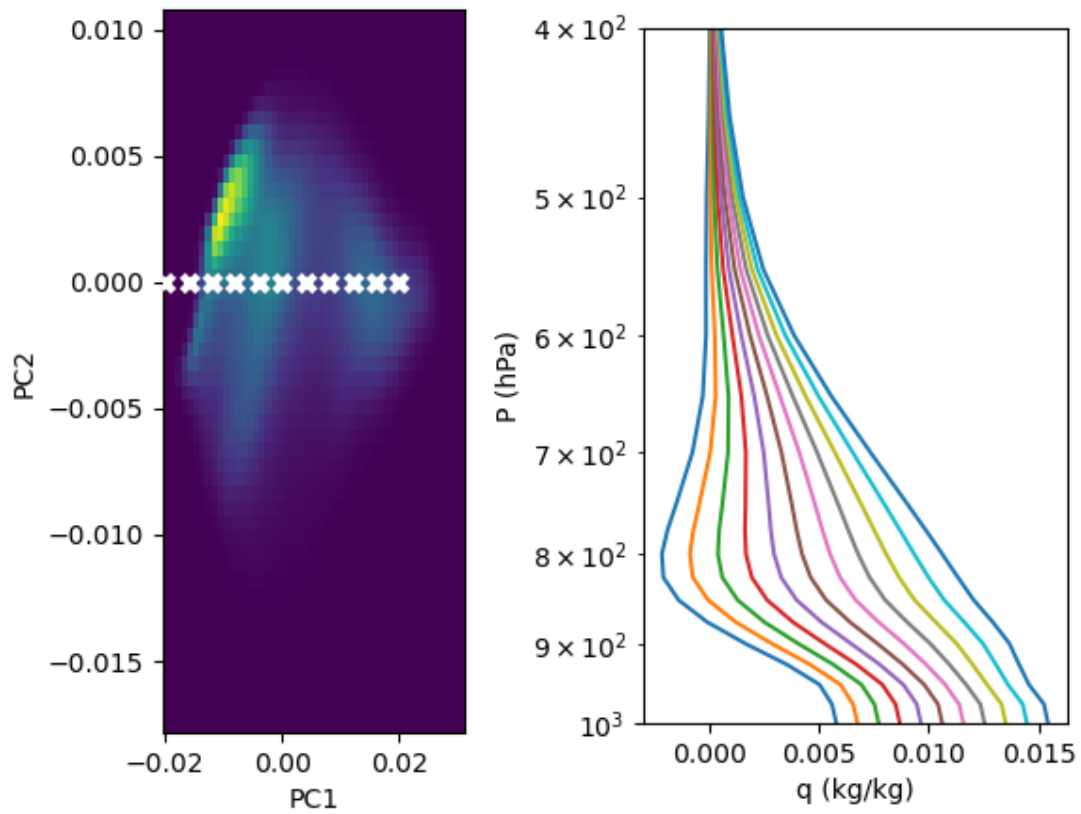

**Figure S5.** Example cross-section of water vapor profiles across PC1, showing the variation in total magnitude.

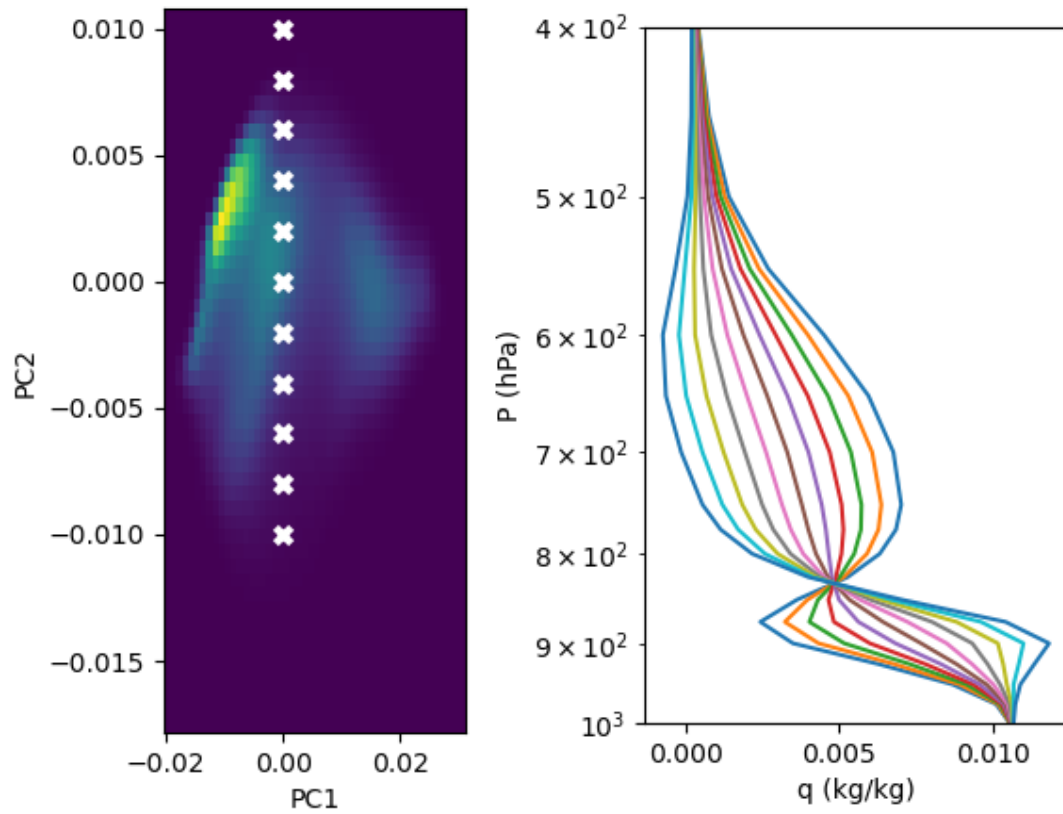

**Figure S6.** Example cross-section of water vapor profiles across PC2, showing how the upper-level to lower-level  $q$  varies along this component.

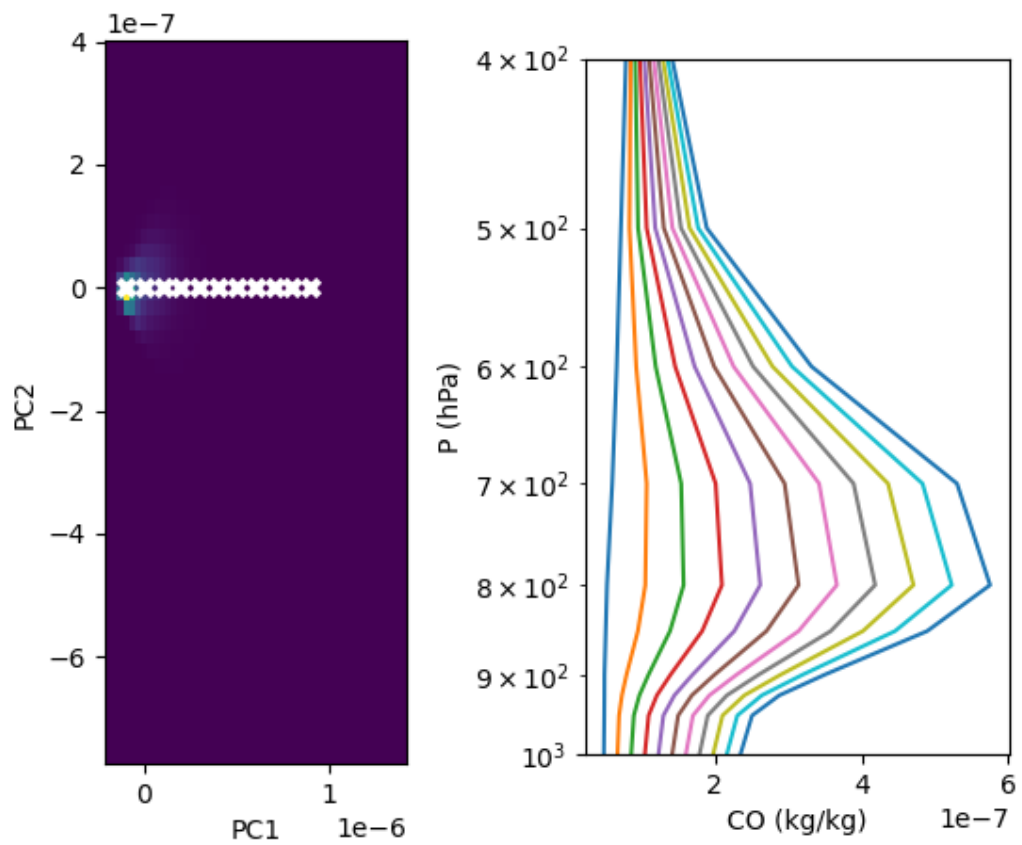

**Figure S7.** Example cross-section of carbon monoxide profiles across PC1, showing the variation in total magnitude.

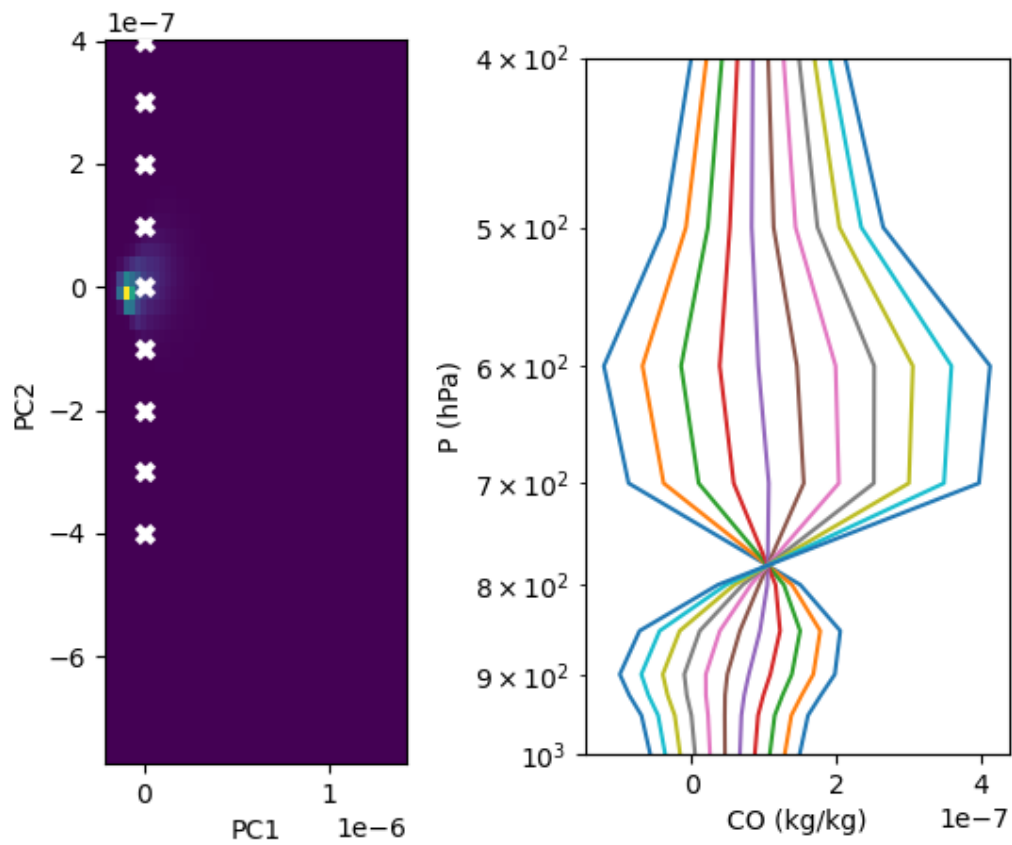

**Figure S8.** Example cross-section of carbon monoxide profiles across PC2, showing how the upper-level to lower-level CO varies along this component.
