# Supplementary material for: Vertical structure of a springtime smoky and humid troposphere over the Southeast Atlantic from aircraft and reanalysis
Source: Copernicus journal article supplement (doi:10.5194/egusphere-2023-2412), 2023-11-22
Supplement: Supplementary file [file egusphere-2023-2412-AC1-supplement.pdf]

*We thank both reviewers for their detailed comments. We hope we have satisfactorily addressed each one, and have made some additional minor editorial revisions for readability, flow, and typos. Our responses to the reviewers' comments are in italics below, and the tracked-changes version shows all edits made (referenced in relevant comments).*

**RC1: 'Comment on egusphere-2023-2412', Anonymous Referee #1, 18 Dec 2023**

Review of « Vertical structure of a springtime smoky and humid troposphere over the Southeast Atlantic from aircraft and reanalysis ».

I find that this is a good and well written that can be published after only minor corrections.

*We thank the reviewer for their comments and review.*

Page 5 line 23 : What does « incorporated » mean in this context? Is it assimilation ?

*We have clarified this passage with a better reference to Hersbach et al 2020, which discusses the datasets which are/not assimilated in ERA5, thank you for catching this.*

Page 8 : Was there some space-time interpolation needed to get the reanalysis on the same measurement locations as the ORACLES ? If so, what was it ? The co-location part of the method is a bit unclear to me.

*Thank you for this comment and for catching this oversight. We used a nearest-neighbor collocation as in Pistone et al. (2021), and have added more detail on this to Section 2. The 3-dimensional nature of the reanalysis, plus the variability in profiles (some of which were ramps covering significant distance) led us to simplify the process in this manner. We note that we found no dependence of the obs-reanalysis relationship (or goodness of agreement) on either spatial or temporal differences. A version of Figs 2-4 focusing solely on the square spirals, i.e. more spatially constrained profiles, also showed much the same result, albeit with better overall spatial collocation across the profiles, due to the nature of the ramp maneuvers. We use both types of profiles in the main analysis as one-third of the ORACLES profiles were spirals versus ramps, and utilizing a larger portion of the dataset allows for more robust statistics.*

Page 8, line 20 : reference needed for underestimation of CO by CAMS (e.g. Inness et al 2019) or other

*This sentence refers to the result shown in Figure 2 (as well as in Figs 3 and 4), with the CAMS vs observed comparison showing a slope <1. Following this comment and one from Reviewer 2, we have added additional supplementary figures to better illustrate the CAMS underestimation that we describe here, added the fits to Figs 2-4 for better illustration, and additional description from other references as in additional comments below.*

Fig2 caption: change scatters to scatterplots

*We have made this edit.*

Table 1 : What accounts for the improvement in water vapor correlation from 2016-2018 in CAMS but at the same time, a decrease in CO correlation ? The  $q$  vs  $q$  correlation suggest that the dynamics and physics are working well in ERA5/CAMS but something has gone wrong with the CAMS CO. The correlation  $R^2$  has fallen and is possibly not even significant. I think you need some significance test on these correlations. What is the explanation for this fall and for the low correlation (0.55). It there a

problem with the long-range transport in CAMS. Maybe a contingency table would be helpful to see if the plumes were captured but at the wrong location or the wrong time, or where nothing was seen at all with CAMS.

*While the focus of this paper isn't on the assimilation algorithms used in the reanalyses studied, and a full diagnosis would be beyond our current scope, there are a couple of possible explanations for the correlation variations, which we had intended to convey in our text (starting p8L32). First, there are substantial differences in deployment location resulting in different parts of the plume being sampled (i.e., farther from emissions sources means more opportunity for the reanalysis to diverge from the observations for a given emission inventory). The range in observed values may also produce lower  $R^2$  values because, for example, the range in CO values is simply smaller in October. Finally, the BB conditions applied throughout the burning season may also be variably accurate (e.g., if the CAMS emissions inventories applied from the source are more in agreement with observations earlier in the season compared with October, which sees overall less emissions and the onset of moist convection, this will result in poorer correlation with the observations).*

*We did present the statistical significance of the values in Table 1 in the caption, where we indicate that the p-values were low ( $<0.001$ ) for all correlations in the table. We agree that robust statistical significance is not always meaningful in physical terms, as suggested by the fact that the low MERRA-2 correlations also have low (i.e., significant) p-values, though obviously also have low  $R^2$  as well. These points have been clarified in the body of the text (p. 9).*

*We would like to take this opportunity to note that in preparing this revision, we noticed an error in that the statistics presented in Table 1 (for 2017 and 2018) were for the full dataset rather than south of 5S as was stated in the text. The data in Figs 3 and 4 were (and are) as described. Reassuringly, and as was already stated, the numerical results are largely consistent for the two data (sub)sets; the primary difference in the updated table is a poorer  $R^2$  in MERRA-2 for the 5S subset and, of course, fewer datapoints overall. We apologize for this error; it has been resolved in the revision.*

*A more comprehensive analysis of trajectories of individual airmasses would indeed be interesting, but we consider it beyond the scope of this particular work due to difficulty in distinguishing the sheer numbers of "individual" plumes in the region. Rather, as addressed in a later comment, we consider the region as containing a single plume of varying magnitude, and focus on the variability in magnitude and location of the persistent smoke plume over the region as it is made up of airmasses of mixed origins and ages. Figs 2-4 show that there is no common instance of an aircraft-observed plume not showing up at all in CAMS (i.e., there is no cluster of orange points below the 1:1 CO line, with the exception of a few in 2017 which are already fairly low-smoke conditions). That said, the "right airmass, wrong place" condition (specifically regarding vertical location) is a known issue with MERRA-2, as discussed in our text, with more detail provided in Pistone et al., 2021.*

Page 17, line 18 : Least-> lowest

Done

Page 20, line 2 : the most humid profiles (q1 and q2) are the most frequent

*This sentence has been reworded.*

Page 20, Line32 : it would be clearer to write : the air at the altitude of the jet appears to originate from higher altitudes to the north of the jet more frequently than from the continent directly to the east.

*This passage has been clarified.*

Page 22 line 20 : The background/smokeless case is probably not 100% smokeless and therefore you are capturing a real increase at altitude due to the sampling of long-range transport of plumes. In the free troposphere there can be several layers with higher or lower mixing ratios of CO.

*We agree that the background case is probably not 100% smokeless. However, it would be puzzling if the CO actually peaked at 400hPa over the ocean, given the general extent of the continental boundary layer up to a typical maximum of 500hPa, which corresponds to the typical maximum of the AEJ-S. This combined with positive pressure velocity (downward motion) over the oceanic region suggests there is no direct pathway for continental smoky airmasses to reach these higher altitudes, and that 400hPa should be closer to the global background values for CO, which we expect to be lower than air masses influenced by the continental source region. Regarding the multi-layered nature of the free troposphere, we acknowledge that this is a limitation of our approach: by selecting only 6 cases to be representative, and by using the coarser resolution of CAMS, we are not able to capture the true layered resolution of the BB plume. However, our goal with this study is to simplify the complex and varied atmospheric states in this region, to a manageable number of case studies. We have clarified these points in this passage of our text (track-changes p.24).*

Page 22, line 27 : with only a slight decrease in magnitude – does « magnitude » here refer to the magnitude of the discrepancy ?

*Exactly; that reference shows a consistent low bias from approximately 200hPa to 550hPa for the Windhoek site, with a small improvement in the agreement below that level. We've revised the text to clarify this point (p.24).*

Page 22 line 29, I thought profile 6 was showing an increase in CO with altitude. Isn't it unlikely that it is a constant-CO atmospheric structure so there are always small increases throughout the free troposphere depending on the transport of different airmasses in different layers.

*This comment is similar to the one two comments above, so we hope we have clarified this point with the above response. Due to the general circulation patterns, the sources, and the previous discussion of known biases in CAMS, we believe that this profile is effectively a smokeless case, i.e. one which has not been significantly influenced by the continental BB plume but rather is fairly uniform "background values" (with the caveat of course that there are always variations in reality; these will likely be minimal given the CAMS resolution considered). This is again a limitation of our approach which attempts to condense the full range of observations into a limited number of case studies. We've added text in this paragraph to clarify these points, as well as a new supplemental figure showing the statistical range of the profiles classed into each k-means profile type (Fig S5; track-changes p. 24).*

Page 23, Line 24 : how would the frequency of the humidity profiles have any effect on the amount of smoke available for transport ?

*Thank you for this comment. We meant to convey that the frequency of humidity profiles and the smoke become somewhat decoupled from one another later in the season, not that the former influences the latter; this passage has been reworded to better clarify this point (track-changes p. 25).*

Page 23, Line 25 : The biomass burning plume, (which one) ? Or biomass burning plumes (in general) ?

*We use the term “plume” throughout to mean the generally persistent seasonal signal of biomass burning aerosol and associated combustion products (such as CO), following the nomenclature used in other works (e.g. Eck et al 2013; Redemann et al, 2021, and the references therein), although, as we intended to convey here, the “plume” certainly varies episodically (spatially and temporally). We have revised this passage for clarity (track-changes p. 25).*

Page 24, Line 25 : Please rewrite this sentence: This does not mean that this more remote region is not influenced by the biomass burning plume (indeed, this sector contains St Helena Island, whose smoke and humidity vertical structure are studied by Adebisi et al. (2015) and others, and the Ascension Island observatory is located to the west of the northwesternmost sector we consider, i.e. even more removed from the source); but the smoke there is more episodic.

*I believe this comment refers to the sentence in the previous comment; we have revised this sentence per the above.*

Page 28 : I do not see the link between the first paragraph of this discussion and the results presented in the article. You need to integrate or link the discussion with the results section to make this part relevant to what we have just been reading about, otherwise it seems like an afterthought.

*Thank you for this comment. This section was intended to place our work in the motivational context, i.e., the “why” rather than just the descriptive “what,” the latter of which makes up the bulk of the present manuscript, but evidently we needed to make those connections clearer. We have revised this section (track-changes p. 30) and added some text to the first paragraph of the introduction (p. 2) to better communicate this framing.*

## **RC2: 'Comment on egusphere-2023-2412', Anonymous Referee #2, 08 Jan 2024**

Review on preprint “Vertical structure of a springtime smoky and humid troposphere over the Southeast Atlantic from aircraft and reanalysis” by Pistone et al.

This manuscript proposes a climatological characterization of water vapor and biomass burning plumes in the south-east Atlantic area, with the overarching aim of gaining a better understanding of the radiative impact of aerosols. Therefore, the authors rely on model reanalyses, constrained by data assimilation (ERA5 and CAMS). As observations and simulations of aerosol concentrations are difficult to exploit due to higher uncertainties, the diversity of the compounds making up aerosols and the complexity of the physical parameters influencing AOD (species involved, optical properties but also aerosol size distribution, mixing state...), the authors use CO concentrations as a proxy for the signature of fire plumes.

To support this choice, the authors first demonstrate the ability of the models used to reproduce water vapor, as well as the general structures of CO and AOD, and then demonstrate the good correlation

between AOD and the total CO column in observations and simulations. Using k-means clustering of the CO and q profiles mapped onto their 2 principal components, the authors then show that the variability is well represented by 6 clusters of q and 6 clusters of CO. Finally, the number of profiles in each cluster for each month of the studied time period is analyzed.

This manuscript reports on a milestone in a wider study, since it does not go as far as analyzing the radiative impact of aerosols for the identified typical situations. Nevertheless, the work is original, rigorous and well presented. Most of the figures are very clear and the text well written.

I recommend publication, and suggest only minor revisions, listed below.

*We thank the reviewer for their review, and hope we have sufficiently addressed the specific comments below.*

Minor comments:

Abstract.: it would be helpful to have a summary of the main features identified in the clusters.

*Thank you for this comment. It was a struggle to get our abstract down to the 250-word limit now required by ACPD, and much desired detail had to be excluded. If it is okay with the editorial team, we have added a more descriptive summary in the last paragraph of our abstract to address this comment.*

Section 2:

The different sections should include some discussion on the uncertainties for each dataset (with numbers).

*Thank you for catching this oversight. While Section 2.1 already included some description of the measurement uncertainties, we have added more text and references in the relevant paragraphs. In all cases, the observational uncertainties are much smaller in magnitude than the ranges seen in the observation-reanalysis comparisons (which of course have no uncertainties associated with them, other than uncertainties stemming from spatial and temporal resolution).*

For the reanalyses: I think CAMS also assimilates IASI CO observations. I would also be important to detail the biomass burning emission inventory used in the simulations, as well as the potential corrections. I think that the GFAS inventory is used. In the reference paper, Kaiser et al. (2012) recommend applying a factor of 3.4 on BB emissions for aerosols. Is it the case in the reanalyses used here? This could partly explain why the underestimate in AOD is lower than the underestimate in CO mentioned in Section 3.1.

Kaiser, J. W., Heil, A., Andreae, M. O., Benedetti, A., Chubarova, N., Jones, L., Morcrette, J.-J., Razinger, M., Schultz, M. G., Suttie, M., and van der Werf, G. R.: Biomass burning emissions estimated with a global fire assimilation system based on observed fire radiative power, *Biogeosciences*, 9, 527–554, <https://doi.org/10.5194/bg-9-527-2012>, 2012.

*Per the Inness et al (2019) reference, the current CAMS reanalysis assimilates only MOPITT and not IASI CO (they explain that it was included in a previous reanalysis product, but produced discontinuity). Per the same reference, CAMS does indeed use GFAS v1.2 for the biomass burning emissions inventory, which*

*was updated from the v1.0 described in the Kaiser et al., 2012 reference. The scale factor for BC is regionally determined and applied (Inness et al, 2019, Section 2.1.1). There are a number of factors which likely contribute to the quantitative discrepancies between the observations and reanalysis, for aerosols this is particularly acute since necessarily the satellite assimilations are of total and total-column aerosol optical depth, and the model starts from twelve speciated aerosol bins, which are then aged, processed, and integrated and summed (assuming certain optical properties) to get something comparable to satellite-observed AODs. Several additional papers could likely be written on the relative contributions to these discrepancies, but to keep the scope of the current work manageable, we hope to limit the discussion specifically to the “what” rather than the “why” of these differences.*

Section 3:

For model evaluations, it would be helpful to provide the statistics of the comparisons in terms of mean relative bias for q and CO in Table 1 (as for AOD in Table 2).

*We have added an additional supplementary figure (new Figure S3) to better illustrate the AOD, CO, and q differences for each deployment.*

From Figures 2-4, it is not clear to me that CAMS only underestimates large CO values (authors mention values > 300ppbv). Showing the mean simulated and observed profiles, and the corresponding mean bias, would be interesting. Also, models tend to simulate wider plumes due to too large dispersion. Could this explain an underestimate of maximum values (in addition to the dilution due to the resolution), and an overestimate of background values in some areas? A general discussion of the CAMS model performance in simulating the LRT of BB plumes in the literature would be helpful (could also be in section 2).

*In Figs 2-4, the more dramatic underestimation at higher CO values is seen in the difference in slope of the plume level data compared to the 1:1 line. We have added the least-squares fits (from Table 1) to the data in these figures to better highlight this feature, and an additional composite supplemental figure (new Figure S1) showing a subset of aircraft profiles and the corresponding reanalysis profiles, which illustrates the underestimation at the altitude of maximum plume. There does not appear to be a particularly overly-dispersed plume in CAMS (i.e., we see no corresponding CO overestimation at other altitudes outside the plume maximum; Fig S1), but we acknowledge that ~1km vertical resolution considered may not be optimal for diagnosing that particular feature. Regarding the CAMS model performance question, it is difficult to answer beyond the scope of this paper (i.e., “performance” is usually identified by comparison to observations, which are limited in many remote regions), but by presenting this work, we hope we have addressed that question for the relevant SEA region and time. We have revised the discussion in the (new) Section 3.1 (p.6) and Section 4 (p. 24) to better convey these points.*

Section 3.1:

Would it be possible to calculate the relative aerosol mass below the aircraft to evaluate the possible overestimate in AOD if the full column is considered?

*Because of the instrument design and aerosol profiles, there is no way to actually quantify below-aircraft aerosol; we would only be able to assume some constant or weighted PBL AOD. In the ORACLES dataset, there is an above-cloud AOD flag (determined according to inlet-based gradients where available), which*

*is available over more spatial range than the profiles shown here, but does not allow for characterization of the vertical structure that the aircraft profiles show. More details on the full-column AODs available may be found in LeBlanc et al (2020), doi: 10.5194/acp-20-1565-2020. We also note that for the aircraft profiles considered in the current work, the observed/reanalysis comparison (Fig 6, colorbar) shows no dependence on altitude (i.e. is not indicative of a systemic below-aircraft AOD being missed).*

Among the uncertainties in the simulated AOD, the authors could also mention the size distribution and the aerosol mixing state...

*This has been made more explicit in Section 2.2 (track-changes p.6).*

Regarding the impact of hygroscopicity, what would be the associated variation in AOD? As this been evaluated in CAMS?

*That is an outstanding question; to the best of our understanding, aerosol hygroscopicity evolution is not included in the CAMS aerosol scheme. Previous studies using the ORACLES observations attempted to qualitatively assess these impacts, and despite the well documented water content presented here, there is relatively low \*relative\* humidity (with approximately 70% of observations at RHs below 60%, and 98% of observations above the PBL having RH<80%; Pistone et al 2021) seen in the aircraft data. Thus, the humidification effects are likely not dramatically impacting aerosol optical properties. Shinozuka et al., 2020 estimated that the effect of aerosol hygroscopic swelling on extinction was fairly minimal in the free troposphere, with an ambient RH/dry ratio of less than 1.2 for 90 % of measurements, suggesting the same may be true for AOD. Given the complexity of the various factors influencing aerosol variation (and discrepancies of reanalysis compared to observations), this is beyond the scope of the present study, although we are certainly aware of and interested in future work on the magnitude and potential impacts of these processes.*

Section 4:

The figures in the supplementary material really help to understand the method, but the legends need to be revised as they are far too vague and not self-explanatory (especially figures S3-S8). It seems to me that the principal components themselves are not shown (cf. l.12, p.17).

*We have revised the PC supplementary figures and added more detail in the figures and their captions to clarify the method.*

I am surprised that the shape of CO profile is very similar for all clusters, unlike that of water vapor, and I was wondering if similar profile shapes were observed during the ORACLES campaign. Could this shape be due to the data assimilation using satellite instruments that lack vertical sensitivity?

*This is indeed an interesting point. The key difference between CO and q is their source: while CO in this region is an indicator of air masses originating on the smoky continent, air masses of high q in this region can either be of smoky (and humid) continental origin, or from the ocean surface/boundary layer. Thus while it may seem non-intuitive that these closely correlated parameters show different vertical shapes, it's essentially showing the same thing: a variation in plume altitude and vertical extent, with the distinction that the profiles always have a more-humid and less-smoky boundary layer below. This has been clarified in the text (track-changes p.23).-24 We also acknowledge that the more coarse vertical resolution of CAMS likely limits how much the shapes can vary.*

*Similar profile shapes were observed in ORACLES, a selection of which was shown in Pistone et al 2021 Fig 8. Per this and some other reviewer comments, we have added additional supplementary figures showing the aircraft CO profiles (Fig S1) as well as the ranges of reanalysis CO and q profiles corresponding to each k-means cluster (Fig S5).*

Do the CO profiles corresponding to the cluster q4 also exhibit a signature from a transport of air masses from another area (linked to the dry intrusion above the PBL)?

*That's an interesting question; while our previous trajectory analysis established the humid air mass origin from the continent (Pistone et al 2021, Figs 16-17), we have not explicitly performed any case studies on the origin of the drier "gap air". However, Figure 9 in the current work suggests large-scale patterns of southwesterly winds at 600-700hPa, as was described in the text (p.20L18 in the original submission). This has been clarified in the following paragraphs (track-changes p. 21,23; this section has been slightly restructured for better flow). The CO profiles corresponding to q4 are largely C3 and C5, which are profiles which show a higher-altitude CO peak compared with C4, which is consistent with this picture.*

p.22, the authors discuss the cluster C6 and a possible overestimate in background values: cf previous comment for Section 2.

*I think the Section 2 comment to which the reviewer refers is the one on the assimilation/BB inventory used in CAMS. I hope we have adequately addressed this in the above response to that comment.*

p.23: l. 1-2: the authors state that the profiles from the k-means is consistent with the observations. I may have missed the information but I think it would be useful to include more precise comparisons in terms of profile shape, for CO in particular since uncertainties in the simulations are larger. This could be essential for later use in a radiative transfer model assessing the radiative impact of aerosols.

*We have added supplemental figures showing the distributions in profiles for each k-means cluster for both q and CO (Fig S5), and agree that the ranges shown here will be quite instructive when establishing the RT calculations.*

The authors mention that clusters corresponding to lower CO concentrations include both background profiles and more episodic transport (p.23). Would the number of clusters help differentiate profiles with no BB signature and those with a smaller plume?

*We experimented with a range of clusters (between 4 and 9) to try to determine if there was an optimal number before settling on 6. For a cluster analysis of >6 clusters, there is no additional information added in terms of new shapes or distributions; instead the extra clusters added are intermediates in magnitude between the existing clusters. Thus, we chose 6 as a balance between capturing the full range of structure, and not having too many subdivisions so as to confound the results. As in the comment above, the ranges of values in each cluster will allow us to evaluate the magnitude and significance of these differences.*

The discussion of the temporal variability of the number of profiles in each cluster could be linked more explicitly to the variability in fire activity.

*We have added more discussion of the seasonal changes in fire patterns (track-changes p.25).*



Discussion:

p.28, l. 23-24: The authors state that the case studies of Cochrane et al. 2022 are included in the climatology presented in the paper. To what clusters do they correspond?

*The particular case studies shown in the Cochrane work are included in the aggregate comparisons of Figs 2 and 3. The 9 specific profiles they present correspond to C2, C3, or C4, and q2, q3, or q4 following the k-means method.*

Technical corrections:

p.5, l. 6: scattering aerosol extinction (no need for a capital A)

*Thanks, fixed.*

Section 3: only a subsection 3.1 for aerosols. Maybe include another subsection for CO comparisons?

*This may be stylistic as much as anything, but point taken that another subsection makes sense here.*

p.8, l.24: missing verb?

*A small one, but yes, thank you, fixed.*

Supplemental figures need more precise legends.

*We have updated the relevant supplemental figures with more detailed captions and axes.*

# Vertical structure of a springtime smoky and humid troposphere over the Southeast Atlantic from aircraft and reanalysis

Kristina Pistone<sup>1,2</sup>, Eric M. Wilcox<sup>3</sup>, Paquita Zuidema<sup>4</sup>, Marco Giordano<sup>3</sup>, James Podolske<sup>2</sup>, Samuel E. LeBlanc<sup>1,2</sup>, Meloë Kacenenbogen<sup>5</sup>, Steven G. Howell<sup>6</sup>, and Steffen Freitag<sup>6,7</sup>

<sup>1</sup>Bay Area Environmental Research Institute, Moffett Field, CA, USA

<sup>2</sup>NASA Ames Research Center, Moffett Field, CA, USA

<sup>3</sup>Desert Research Institute, Reno, NV, USA

<sup>4</sup>Department of Atmospheric Sciences, Rosenstiel School of Marine, Atmospheric and Earth Science, University of Miami, Miami, FL, USA

<sup>5</sup>NASA Goddard Space Flight Center, Greenbelt, MD, USA

<sup>6</sup>University of Hawaii at Manoa, Honolulu, HI, USA

<sup>7</sup>now at: State Agency for Nature, Environment and Consumer Protection in North Rhine- Westphalia (LANUV NRW), Recklinghausen, Germany

**Correspondence:** Kristina Pistone (kristina.pistone@nasa.gov)

**Abstract.** The springtime atmosphere over the southeast Atlantic Ocean (SEA) is subjected to a consistent layer of biomass burning (BB) smoke from widespread fires on the African continent. An elevated humidity signal is co-incident with this layer, consistently proportional to the amount of smoke present. The combined humidity and BB aerosol has potentially significant radiative and dynamic impacts. Here we use aircraft-based observations from the NASA ORACLES (ObseRvations of Aerosols above CLouds and their intEractionS) deployments in conjunction with reanalyses to characterize co-variations in humidity and BB smoke [across the SEA](#).

The observed plume-vapor relationship, and its agreement with the ERA5 and CAMS reanalyses, persists across all observations, although the magnitude of the relationship varies as the season progresses. Water vapor is well-represented by the reanalyses, while CAMS tends to underestimate carbon monoxide especially under high BB. While CAMS aerosol optical depth (AOD) is generally overestimated relative to ORACLES AOD, the observations show a consistent relationship between CO and aerosol extinction, demonstrating the utility of the CO tracer to understanding vertical aerosol distribution.

We next use k-means clustering of the reanalyses to examine multi-year seasonal patterns and distributions. We identify canonical profile types of humidity and of CO, allowing us to characterize changes in vapor and BB atmospheric structures, and their impacts, as they covary. ~~Predominant profile types vary~~ [While the humidity profiles show a range in both total water vapor concentration and in vertical structure, the CO profiles primarily vary in terms of maximum concentration with similar vertical structures in each. The distribution of profile types varies](#) spatiotemporally across the SEA region and through the season, [ranging from largely one type in the northeast and southwest, to more evenly distributed between multiple types where airmasses meet in the middle of the SEA. These distributions follow patterns of transport from the humid, smoky source region \(greatest influence in the northeast of the SEA\) and the seasonal changes in both humidity and smoke \(increasing and](#)

decreasing through the season, respectively). With this work, we establish a framework for a more complete analysis of the broader radiative and dynamical effects of humid aerosols over the SEA.

## 1 Introduction

Aerosol effects on atmospheric radiative transfer and dynamics are complex and varied. Aerosols not only produce direct radiative heating or cooling, but may also alter the properties of nearby clouds by directly changing a cloud's reflectivity (albedo), thickness, or altitude; the total cloud amount; or the surrounding atmospheric dynamics. These effects are especially complex for absorbing aerosols such as biomass burning (BB) smoke. The combination of direct, indirect, and semidirect effects together may result in either an overall warming or cooling effect (e.g., Koch and Del Genio, 2010) depending on the specific aerosol properties, but also on the surrounding cloud, radiative, and meteorological context. A key consideration to understanding this aerosol-cloud-climate puzzle is the role of atmospheric water vapor, both in total amount and its location. Water vapor plays a significant role as a climate feedback parameter (e.g., Forster et al., 2021), has its own localized radiative heating effects, and is important to cloud formation and lifetime in the present and future climate. Thus, it is important to consider how the local atmospheric properties may either affect or be affected by the combined presence of aerosols and water vapor together. By characterizing these properties individually and together, we aim to understand the radiative and dynamic effects of humid and smoky airmasses for a given region (here, the SEA).

The atmosphere over the southeast Atlantic Ocean (SEA) is subjected to a consistent layer of biomass burning (BB) smoke from widespread fires on the African continent in the austral springtime (August through October). This smoke layer is initially lofted high in a continental mixed layer ( $\sim 5\text{-}6\text{km}$ ,  $\sim 500\text{--}600\text{hPa}$ ) before being transported westward by the south African Easterly Jet (AEJ-S,  $\sim 600\text{-}700\text{hPa}$ ) where it overlies and ultimately mixes into the SEA stratocumulus-topped oceanic boundary layer. These conditions make it the SEA an ideal location to study the varied aerosol effects on climate. The NASA ORACLES (ObseRVations of Aerosols above CLouds and their intERactionS; Redemann et al., 2021) campaign was designed to study just that; in the present work, we use aircraft-based observations from the three ORACLES deployments, which by design (by design) spanned the spring BB season (September 2016, August 2017, and October 2018). Taken together, these data allow us to characterize the spatial and temporal variations in atmospheric chemistry, aerosol, and meteorological structure as the season progresses, specifically the co-variations in humidity and aerosol. In a previous work (Pistone et al., 2021), we showed how observations from ORACLES-2016 exhibited a strong correlation between plume strength (i.e., CO concentration and aerosol extinction) and water vapor specific humidity. This is consistent with previous work over the region; for example, (Adebisi et al., 2015) Adebisi et al. (2015) had analyzed MODIS and radiosonde data (over St Helena Island,  $15.9^{\circ}\text{S}$ ,  $5.6^{\circ}\text{W}$ ) and found that increases in aerosol optical depth were associated with increases in mid-troposphere ( $700\text{-}500\text{hPa}$ ) moisture content, and the presence of humidity was noted even in southern African BB aerosol measurements in the Southern African Regional Science Initiative 2000 (SAFARI 2000) campaign (e.g. Haywood et al., 2003; Magi and Hobbs, 2003). More recently, Cochrane et al. (2022) used high-vertical-resolution aircraft data to quantify the aerosol and water vapor heating rates for specific case studies from ORACLES-2016 and -2017. Both these recent studies concluded that there is significant shortwave

water vapor heating coincident with the aerosol heating within the combined aerosol/humidity layer, despite longwave water vapor cooling.

The presence of humid smoke may have additional impacts on the lower atmosphere, including on the underlying stratocumulus clouds. Absorbing aerosols above the cloud layer have been found to suppress cloud-top turbulent fluxes, resulting in physically thicker clouds with higher liquid water path (LWP) (e.g., Wilcox, 2010; Wilcox et al., 2016) and thus higher cloud albedo. In a modeling-based study, Ackerman et al. (2004) modeled the influence of above-cloud water vapor using several case studies informed by field measurements, and concluded that the cloud liquid water path response to aerosol (i.e., increasing LWP due to precipitation suppression) had a much stronger response in the presence of overlying water vapor than under dry conditions, due to changes in cloud-top entrainment. Deaconu et al. (2019) used satellites and reanalysis to conclude that absorbing aerosols in the SEA increased cloud optical thickness and liquid water path, and lowered cloud top altitudes. In a recent study using large eddy simulations, Baró Pérez et al. (2023) found that the moisture in the SEA BB affected the evolution of the underlying cloud field, in addition to radiative effects of the humid BB plume.

Pistone et al. (2021) also presented evidence that the smoke/humidity relationship is present at the air mass origin over the African continent, thus indicating that these airmasses are likely subjected to the combined effects of humidity and BB aerosols for an extended time. In other words, the humid atmosphere observed over the SEA is subjected to not just instantaneous but cumulative direct and semi-direct effects of the layer of BB aerosol, from the time it took a given airmass to leave the continent to when it was measured by the ORACLES flights (on the order of a few days to weeks from origin to observation), above and into the cloud layer. Within our current context, it is important to recognize that the humidity of the above-cloud air will influence the magnitude of aerosol-forced ~~dynamics~~-dynamical effects on clouds. From a practical measurement standpoint, humid aerosols also undergo swelling which affects their remote sensing retrievals and comparisons to modeled results (e.g., Shinzuka et al., 2020; Doherty et al., 2022). By combining aircraft data ~~and~~-with large-scale reanalyses, we aim to characterize the variations in water vapor in conjunction with BB aerosol over the springtime southeast Atlantic region which allows us to assess the realism of the reanalysis datasets commonly used to initialize and constrain model simulations, and to conduct broader studies of the region as a whole.

There are three major goals of this paper. First, to expand the results of Pistone et al. (2021) to discuss how the observed patterns in water vapor and CO vary across the three ORACLES observation periods, which by design sampled different times during the BB season. Second, to assess how well selected reanalysis products capture the results in the observations. Third, to describe a new method to use climatological data to more completely characterize the atmospheric structure over this region and its radiative impacts.

Section 2 describes the observations and ~~reanalysis~~-reanalyses used in this work. In Section 3 we extend the findings of Pistone et al. (2021) to describe the observations from the three deployment years, including a new discussion of CAMS and the climatological representativity of its BB tracers, specific humidity, and aerosol parameters. In Section 4, we ~~then~~ describe our use of a k-means clustering of the ERA5 and CAMS reanalyses to identify canonical atmospheric profile types of varying atmospheric specific humidity ( $q$ ), carbon monoxide (CO), and vertical structure~~and~~, and then describe their changing (co)incidence spatially and throughout the season. Section 5 discusses the broader significance of this ~~work~~-analysis within

the context of previous works on this topic. With this work, we more completely describe the atmospheric structure of smoke and humidity over the SEA and lay out a framework for further analysis of the radiative ~~heating and dynamical impacts~~ of this humid plume ~~within this region, and~~ over time and space, including its effects on clouds and climate ~~over time and space~~.

## 2 Aircraft data and reanalyses

- 5 In the present work, we use aircraft observations from ORACLES, in conjunction with ~~fields~~ data from the ERA5, CAMS, and MERRA-2 reanalyses.

### 2.1 Aircraft instrumentation

The ORACLES field mission consisted of three deployments: September 2016 out of Walvis Bay, Namibia; August 2017 out of São Tomé, São Tomé e Príncipe; and October 2018 also out of São Tomé. All instruments used here were deployed on the  
10 NASA P-3 aircraft during all three ORACLES deployments. ~~1Hz~~ The archived 1Hz measurements are used unless otherwise indicated. A detailed description of the ORACLES experimental construction and instrumentation used here may be found in Redemann et al. (2021), or in the archived instrument dataset metadata (See Data Availability).

Unless otherwise noted, the present analysis focuses on aircraft profile data during each ORACLES deployment, with the 1Hz ~~inlet-based~~ aircraft data averaged within 100m ( $\pm 50$ m) of the reanalysis pressure levels. The locations of these profile data  
15 are shown in Figure 1a-c, showing the locations of 105, 70, and 80 full or partial profiles (ramps or square spirals) sampled during the 2016, 2017, and 2018 campaigns, respectively. Spatial subdivisions used in previous works, as well as the ~~current framework~~ framework for the present analysis, are also illustrated in Figure 1d. Due to the more northern deployment of ORACLES-2017 and -2018, the data shown in Section 3 are subselected to observations south of  $5^{\circ}$ S, to isolate airmasses influenced by the AEJ-S (Pistone et al., 2021).

#### 20 2.1.1 Inlet-based carbon monoxide and water vapor

In all ORACLES deployments, volume mixing ratios of carbon monoxide (CO), carbon dioxide (CO<sub>2</sub>), and water vapor ( $q$ ) were measured by a Los Gatos Research CO/CO<sub>2</sub>/H<sub>2</sub>O Analyzer (known as COMA), modified for flight operations. It uses off-axis integrated cavity output spectroscopy (ICOS) technology to make stable cavity enhanced absorption measurements of CO, CO<sub>2</sub>, and H<sub>2</sub>O in the infrared spectral region, technology that previously flew on other airborne research platforms with  
25 a precision of 0.5 ppbv over 10s (Liu et al., 2017; Provencal et al., 2005). Water vapor measurements of less than 50 ppmv ( $\sim 0.03$  g/kg) were removed due to instrument signal limitations, but this has minimal effect on the data considered here.

In Pistone et al. (2021), we discussed the validation of COMA measurements against two other onboard water vapor and inlet-based gas/aerosol instruments on the payload; following the good agreement shown in that work, the specific humidity measurements presented here are from COMA. We focus on carbon monoxide as a BB tracer because it is a more straight-  
30 forward parameter to accurately model, and, as will be shown, agrees well with observed aerosol extinction across the three deployments.

## 2.1.2 Aerosol optical depth

The Spectrometer for Sky-Scanning Sun-Tracking Atmospheric Research (4STAR; Dunagan et al., 2013) is an airborne hyperspectral (350-1700 nm) sun photometer which measures direct-beam solar irradiance (sun-tracking mode) for retrieval of column aerosol optical depth (AOD; e.g., Shinozuka et al., 2013) and column trace gases (e.g., Segal-Rosenheimer et al., 2014) above the aircraft level. This work presents the column AOD (LeBlanc et al., 2020); we note that Pistone et al. (2021) also utilized 4STAR's column water vapor (CWV) measurements in a similar analysis of the aerosol-water vapor coincidence. Measurement uncertainty in AOD is around 1% (0.01 at 500nm at solar noon), increasing in some cases to 0.03-0.04 for certain cases due to aerosol deposition on the instrument's viewing window. An accounting of 4STAR measurement uncertainties are described in more detail in LeBlanc et al. (2020), and are provided in the data archive for the 1Hz data.

## 2.1.3 Aerosol extinction

The Hawaii Group for Environmental Aerosol Research (HiGEAR) operated several in-situ aerosol instruments on the P-3. Total and sub-micrometer aerosol light scattering coefficients ( $\sigma_{\text{scat}}$ ) were measured onboard the aircraft using two TSI model 3563 3-wavelength nephelometers (at 450, 550, and 700 nm) corrected according to Anderson and Ogren (1998). The scattering used here is from TSI Nephelometer #1 (as identified in the ORACLES dataset) measuring total aerosol scattering and interpolated to the PSAP absorption wavelengths (below). ~~The #1 Nephelometer measured total aerosol scattering~~ Aerosol extinction is the sum of PSAP absorption plus nephelometer scattering.

Light absorption coefficients ( $\sigma_{\text{abs}}$ ) at 470, 530, and 660 nm were measured using two Radiance Research particle soot absorption photometers (PSAPs). We use absorption from the "Front" PSAP. The humidity within the PSAP was not explicitly controlled, but the PSAP optical block was heated to approximately 50°C to reduce artifacts which would result from a changing RH; this had the effect of reducing relative humidity in this instrument to much lower than the 40% within the nephelometers. The PSAP absorption was corrected using the wavelength-averaged correction algorithm (Virkkula, 2010) following the conclusions of Pistone et al. (2019). Instrument noise levels are 0.5  $\text{Mm}^{-1}$  for a 240–300 s sample average, comparable to values reported previously (Anderson et al., 2003; McNaughton et al., 2011).

## 2.2 Large-scale reanalyses

In considering the reanalyses, we use specific humidity ( $q$ ), carbon monoxide (CO), and aerosol optical depth (AOD) fields for the following subsets and resolutions.

The European Centre for Medium-Range Weather Forecasts (ECMWF) has developed global atmospheric reanalysis products for several decades, with ERA5 (ECMWF Reanalysis version 5) being the current product (Hersbach et al., 2019). ~~We~~ (Hersbach et al., 2020). In the comparison with ORACLES flights, we consider ERA5 at 0.25-degree, hourly resolution, at pressure levels of 50hPa intervals between 400 to 750hPa and 25hPa intervals from 750 to 1000hPa ~~in the comparison with ORACLES flights,~~ and we use 0.25-degree, 3-hourly resolution in the k-means analysis. ERA5 does not report atmospheric chemistry or aerosols nor does it ~~directly incorporate aerosol effects~~ assimilate observed aerosol datasets, though satellite mea-

measurements of (aerosol-influenced ~~radiances are incorporated~~) radiances are assimilated into the reanalysis ([Hersbach et al., 2020](#)). In a slight difference from Pistone et al. (2021), here we add the 400hPa level (approx 7.6km) to our analysis to better align with the CAMS reanalysis (below) which reports at 400hPa rather than 450hPa; our previous work only extended to 450hPa (roughly 6.7km), which was chosen to capture the full BB plume height and ORACLES P-3 aircraft operating altitudes, but  
5 the impacts on the statistical results are seen to be minimal.

For analysis of aerosol/chemistry parameters, we consider the Copernicus Atmosphere Monitoring Service (CAMS) reanalysis. CAMS includes chemistry but is coarser than ERA5 both spatially and temporally, namely 3-hourly versus hourly; 0.75° versus 0.25°, and 10 pressure levels from the surface to 400hPa rather than 18 levels (100hPa intervals in the plume level). CAMS uses the same meteorological inputs as does ERA5, assimilates MOPITT (on NASA's Terra satellite) CO retrievals  
10 (among other chemistry), and includes radiatively-active aerosol fields (Inness et al., 2019). While total AOD (from MODIS on both NASA's Terra and Aqua satellites, for our study period) is assimilated into CAMS from satellite observations, the model aerosol scheme uses twelve speciated aerosol tracers ~~;~~ (in specific prescribed size bins, hydrophobic/hydrophilicity state, and treated as externally mixed), which likely leads to less-constrained aerosol results compared to those for trace gases (Inness et al., 2019).

15 The Modern-Era Retrospective Analysis for Research and Applications, version 2 (MERRA-2) is an atmospheric reanalysis produced by NASA's Global Modeling and Assimilation Office (GMAO) (Gelaro et al., 2017; Randles et al., 2017; Buchard et al., 2017). MERRA-2 assimilates observations of meteorological parameters from multiple satellite platforms, as well as aerosol optical depth from satellites (MODIS, AVHRR) and ground-based (AERONET) measurements, into a comprehensive atmospheric model, with explicit accounting of aerosol radiative effects. MERRA-2 datasets are given on a nominal 50 km  
20 horizontal resolution ( $0.5^\circ \times 0.5^\circ$ ) with 72 vertical layers from the surface to 0.01 hPa. ~~Our analysis here subsets this product to the same ERA5 pressure levels for ease of interpretation. The~~ , and the complete set of MERRA-2 files have additionally been sampled up to 1-second resolution along every ORACLES flight (Collow et al., 2020); ~~we use this product averaged to CAMS and~~ . Our analysis here subsets this product to the same ERA5 ~~altitudes to facilitate the comparison.~~ pressure levels for ease of interpretation. While the focus of latter sections is on CAMS and ERA5, MERRA-2 results from 2016 ~~only~~ were  
25 discussed in Pistone et al. (2021); ~~we thus for completeness, in Section 3 we thus also~~ discuss this product ~~in Section 3 for completeness~~ over all ORACLES deployments.

For sections where the observations are compared with reanalyses, the 1Hz aircraft observations are averaged within 100m ( $\pm 50m$ ) of the reanalysis pressure levels. The comparisons with the ECMWF reanalyses are first paired to the closest reanalysis timestep to the profile mean time, then the nearest-neighbor latitude and longitude to the mean profile locations so as to maintain  
30 consistency with the later sections focused solely on reanalysis fields. We note that the results presented here are consistent for subsets of the data considering either solely square spiral profiles (i.e., the more spatially localized profiles) or profiles with the greatest temporal collocation ( $< 1h$ ).

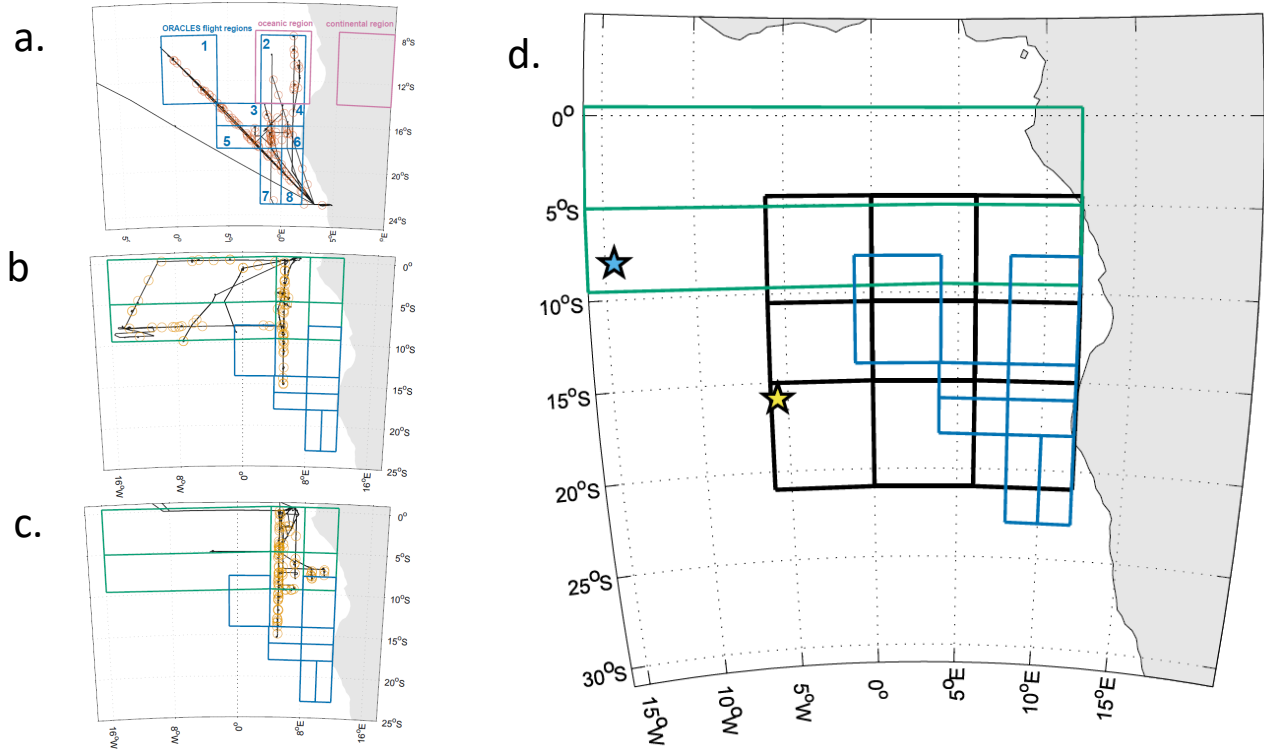

**Figure 1.** Regional distributions of observations and the spatial subdivisions used. (a) From Pistone et al. (2021), the locations of ORACLES-2016 aircraft profiles (orange circles), the regions used for the aircraft-based analysis (blue) and the reanalysis study (lavender). In (b) ORACLES-2017 and (c) ORACLES-2018, more northern profiles were sampled. For ease of comparison, these data (green grid) are divided at  $5^{\circ}\text{S}$  to aid comparison with 2016 (blue grid). Note also the larger westward range of observations in 2017. (d) Summary of the different subdivided regions considered in this and other works. The stars show the sites of previous island-based observations at St Helena Island (yellow star) and Ascension Island (blue star). The thicker black lines are the SEA divisions discussed in Section 4, on a nominally  $6^{\circ} \times 6^{\circ}$  grid which is slightly uneven north-to-south to align with the CAMS spatial resolution and to isolate the AEJ-S latitudes.



### 3 Agreement between reanalyses and aircraft observations

In assessing the representativeness of the reanalyses and their agreement with the ORACLES observations, we begin focus on the parameters of specific humidity, the biomass burning tracer CO, and both column and inlet-based aerosol extinction.

#### 3.1 Water vapor and BB tracer (CO)

We begin our analysis with specific humidity  $q$ , a meteorological field, and CO, a biomass burning tracer. We choose CO as our BB tracer as the modeling of chemical species is subjected to fewer uncertainties than is aerosol modeling. Aerosol as modeled in the CAMS reanalysis considers aerosol speciation, processing, lifetime, and removal for 12 separate aerosol components, while the assimilated observation is column total AOD from satellites (Inness et al., 2019). Because of this, we expect CO to have a more straightforward and accurate representation than the fields of aerosols themselves, for our purposes of assessing and characterizing atmospheric distributions over time. We note that the lifetime of CO in the atmosphere is 1-4 months (Szopa et al., 2021) and thus may show result in accumulation to a higher background value over the span of a given biomass burning season (3 months), but as we show in Section 3.2, the observed aerosol-CO relationship does not vary across the three airborne campaigns.

Previous work in Pistone et al. (2021) showed that the ERA5 reanalysis captured the vertical structure and location of the humid plume remarkably well in September 2016 (there reported as an observed/ERA5 correlation of  $R^2 = 0.79$  for observations above 2km over all flights). ERA5 performed better than MERRA-2 in terms of this direct comparison (observed/MERRA-2  $R^2 = 0.40$ ), due to a known vertical velocity (excessive subsidence) issue in the latter (e.g., Das et al., 2017). Figure 2 shows comparisons between (left, middle, right) ERA5, CAMS, and MERRA-2 versus the observed values from the 2016 ORACLES deployment for (top, middle, bottom) specific humidity, CO, and the relationship between the two. The CAMS reanalysis shows a similar pattern in specific humidity and agreement with the observations ( $R^2 = 0.84$  for  $z \geq 2\text{km}$ ), despite its lower spatial and temporal resolution (Section 2) giving roughly half as many matches compared with ERA5. In all the reanalyses considered, the largest reanalysis-observation discrepancies occur near the top of the boundary layer ( $\sim 1\text{-}2\text{km}$ ).

For the CO comparisons (Figure 2, middle row), there is similar good agreement overall between CAMS and observations ( $R^2 = 0.75$  for  $z \geq 2\text{km}$ ) although the reanalysis tends to underestimate these values for higher observed CO ( $\gtrsim 300\text{ppb}$ ; this is also seen in individual profiles, as shown in Supplementary Figure S1). The overall slope between the CAMS and observed CO is 0.79 (i.e., showing underestimation), compared with 0.98 for the CAMS  $q$  versus observed  $q$ . Still more variability is seen in the direct comparison with MERRA-2 (CO observed/MERRA-2 correlation:  $R^2 = 0.21$ ). This general pattern is consistent over all three ORACLES deployments (Figures 2, 3, and 4), and is also consistent with Pistone et al. (2021), likely due to the aforementioned issue with vertical plume displacement. In other words, MERRA-2 tends to underestimate the higher altitude points while sometimes overestimating lower-altitude points for both CO and  $q$  relative to aircraft observations, while still preserving the relationship between CO and  $q$  for MERRA-2 overall (e.g., Figure 2, bottom right).

The data from August 2017 (Figure 3) and October 2018 (Figure 4) are largely consistent with the picture from September 2016, with a few notable differences. First, the correlations of observed versus CAMS or ERA5 water vapor are slightly better

than in 2016 and substantially better for MERRA-2 (Table 1, with the caveat that there are fewer profile matches for these years). However, the CO observed versus CAMS is a somewhat poorer match both in terms of the  $R^2$  values and the slope for the latter deployments. ~~This may be explained by the difference in dynamic range measured year to year following~~ (All correlation coefficients are statistically significant at the  $p < 0.0001$  level.) This difference in correlations between the three deployments may be partly explained by seasonal evolution of the smoke plume; specifically, higher CO observed in August 2017 results in a slope which is skewed low due to the CAMS high-CO underestimation, and the lower CO observed in October 2018 results in a less robust (i.e., lower)  $R^2$  value due to a smaller dynamic range in CO values. It is also possible that there are differences in the emissions inventory assimilated into CAMS for each month of the BB season, although such diagnostics would be beyond the scope of this paper.

In addition to the direct observation/reanalysis comparisons, Figures 2 to 4 also show how the correlation between CO and  $q$  is represented by each entity (bottom row). The differences between plume level (orange circles) ~~correlations values~~ versus PBL observations (blue squares) are evident (i.e., humid but low-CO air masses are found only in the oceanic PBL), but overall these relationships continue to be well-represented, despite the mismatch in location for some reanalyses versus observations (e.g. the displacement in MERRA-2). As was discussed briefly in Pistone et al. (2021), the magnitude of the observed CO- $q$  relationship varies across different deployments/months (from observations, slopes were 0.020, 0.023, and 0.05 (g/kg)/ppb for August, September, and October, respectively), due in large part to the changing meteorological and BB conditions, namely the increase in humidity and decrease in BB loading as the season progresses (Adebisi et al., 2015; Ryoo et al., 2022).

In light of the better CAMS and ERA5 agreement with observations compared to MERRA-2, in the subsequent sections we focus our analysis on the ECMWF reanalyses (higher-resolution ERA5 for water vapor, and CAMS for chemistry).

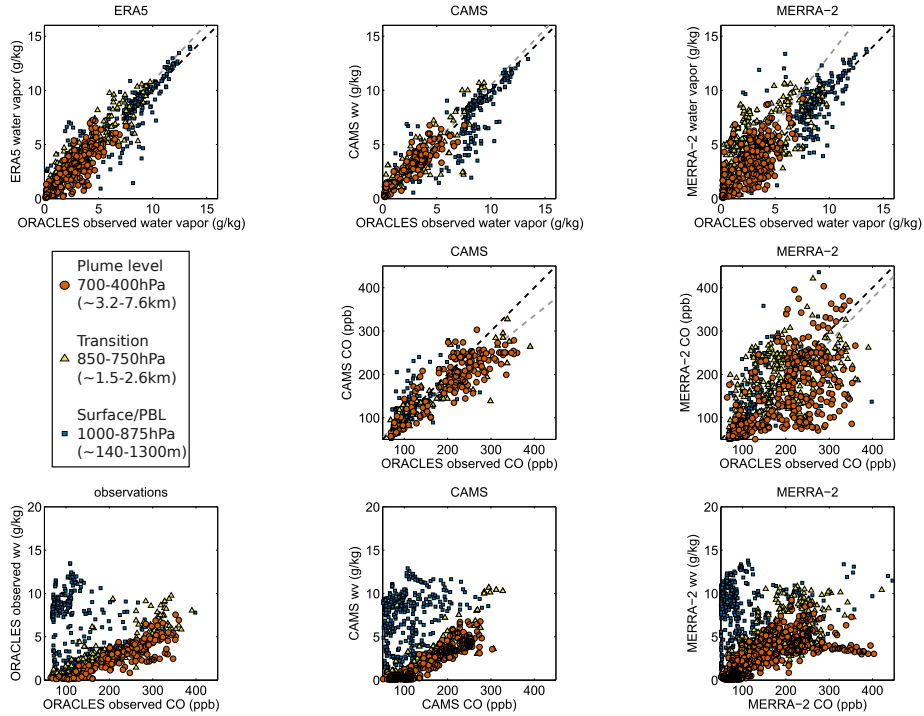

**Figure 2.** Scatters-Scatterplots of water vapor and CO, for September 2016 and by altitude, for-showing data collected during P-3 aircraft vertical profiles (circles in Figure 1a). Comparisons are shown for the (left) ERA5, (middle) CAMS, and (right) MERRA-2 reanalyses. Top row: observed water vapor (average-observed-averaged over a 100m layer) compared to coincident reanalysis values. Middle row: observed CO compared with the same for CAMS (center) and MERRA-2 (left). Bottom row: collocated CO versus water vapor for each product (aircraft observations, CAMS, and MERRA-2). Blue squares= 1000-875hPa (surface to ~1.3km, boundary layer); yellow triangles = 850-750hPa (~ 1.5 – 2.6km, BL top/transition); orange circles = 700-450hPa-700-400hPa (~ 3.2 – 7.6km, BB plume). The 1:1 line is shown as a black dasheddashed line. Correlation-coefficients-and-slopes-of-the-The total least squares fits for data >2km are shown as a grey dashed line and the corresponding values of fits and correlations are given in Table 1.

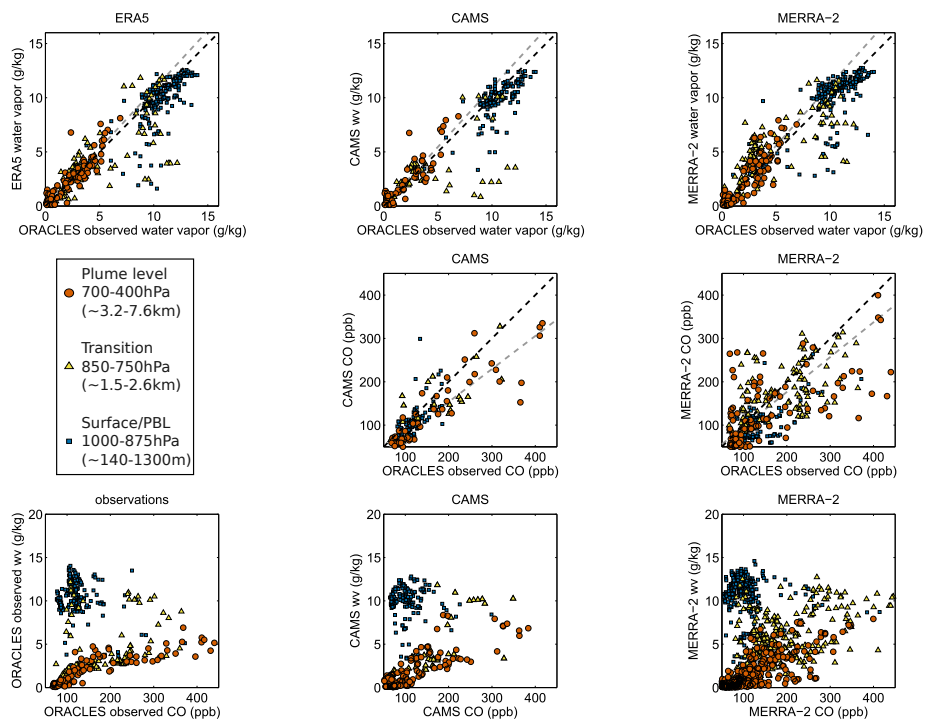

**Figure 3.** As in Figure 2, but for August 2017. Data shown here are from profiles south of  $5^{\circ}\text{S}$  (Figure 1b) to isolate the airmasses influenced by the AEJ-S, although the results are consistent for the larger dataset. The bottom left (observed CO versus water vapor) illustrates the greater range in CO values as compared with 2016.

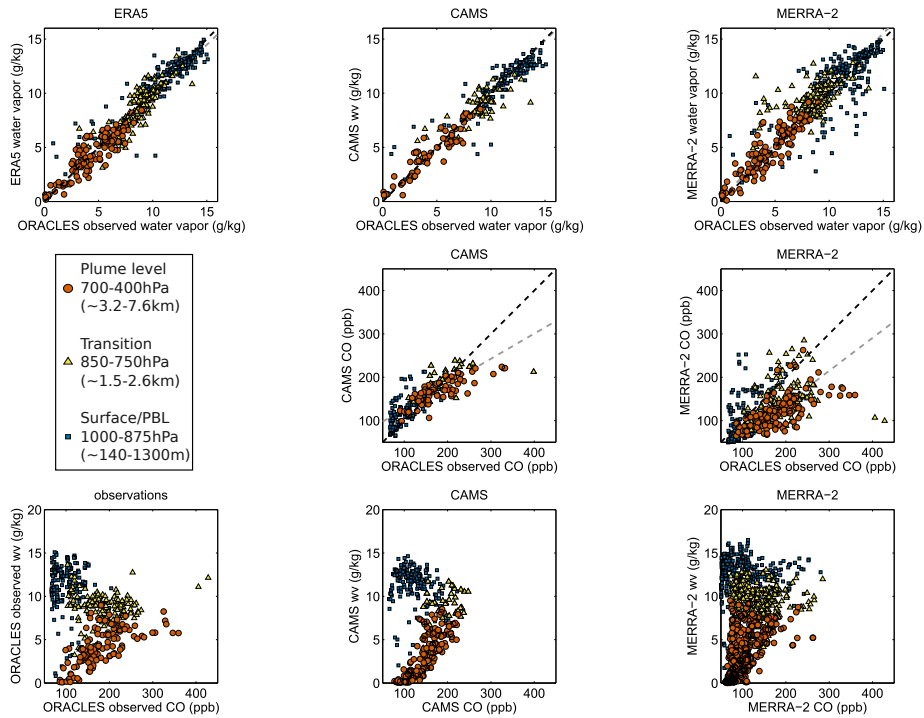

**Figure 4.** As in Figure 2, but for October 2018. Data shown here are from profiles south of  $5^{\circ}\text{S}$  (Figure 1c), although the results are consistent for the larger dataset. Here, the most striking feature is the lower-CO, higher- $q$  conditions (i.e., steeper slope in the bottom row) as compared to observations from earlier in the BB season.

**Table 1.**  $R^2$  values, total number of matched observations, and total least squares linear fits for aircraft and reanalysis data. Data are shown for the subset matching the profiles in Figure 1, and are for altitudes 2km and above (i.e., 800-400hPa levels) and south of 5°S for 2017 and 2018 (i.e., AEJ-S-influenced latitudes). The left columns show correlations between specific humidities, while the right side shows the correlations for CO. All R-values are statistically significant at  $p < 0.0001$ .

| data     | obs $q$ vs $q$ from                       |                                               |                                               | obs CO vs CO from                              |                                              |
|----------|-------------------------------------------|-----------------------------------------------|-----------------------------------------------|------------------------------------------------|----------------------------------------------|
|          | ERA5                                      | CAMS                                          | MERRA-2                                       | CAMS                                           | MERRA-2                                      |
| Sep 2016 |                                           |                                               |                                               |                                                |                                              |
| $R^2$    | 0.78                                      | 0.84                                          | 0.37                                          | 0.74                                           | 0.22                                         |
| num obs  | 516                                       | 237                                           | 516                                           | 237                                            | 515                                          |
| fit      | 1.07x+0.12                                | 1.03x+0.19                                    | 1.28x+0.40                                    | 0.80x+15.7                                     | 1.02x-31.68                                  |
| Aug 2017 |                                           |                                               |                                               |                                                |                                              |
| $R^2$    | <del>0.88</del> <u>0.90</u>               | <del>0.86</del> <u>0.85</u>                   | <del>0.80</del> <u>0.82</u>                   | <del>0.67</del> <u>0.73</u>                    | <del>0.40</del> <u>0.31</u>                  |
| num obs  | <del>305</del> <u>169</u>                 | <del>141</del> <u>78</u>                      | <del>305</del> <u>171</u>                     | <del>140</del> <u>78</u>                       | <del>301</del> <u>169</u>                    |
| fit      | <del>1.006x+0.074</del> <u>1.09x-0.12</u> | <del>0.996x+0.14</del> <u>1.09x-0.008</u>     | <del>1.101.12x-0.014</del>                    | <del>0.76x+0.06</del> <u>1.06</u>              | <del>0.750.80x+7.78</del> <u>1.002x-18.4</u> |
| Oct 2018 |                                           |                                               |                                               |                                                |                                              |
| $R^2$    | <del>0.89</del>                           | 0.91                                          | <del>0.92</del> <u>0.85</u>                   | <del>0.86</del> <u>0.54</u>                    | <del>0.55</del> <u>0.32</u> <u>0.26</u>      |
| num obs  | <del>317</del> <u>207</u>                 | <del>149</del> <u>96</u>                      | <del>317</del> <u>214</u>                     | <del>143</del> <u>93</u>                       | <del>304</del> <u>208</u>                    |
| fit      | <del>0.97x-0.075</del> <u>0.21</u>        | <del>0.96</del> <u>0.99x+0.21</u> <u>0.07</u> | <del>0.95</del> <u>1.02x+0.53</u> <u>0.28</u> | <del>0.60</del> <u>0.58x+62.1</u> <u>68.56</u> | <del>0.70x-3.33</del> <u>0.76x-12.98</u>     |

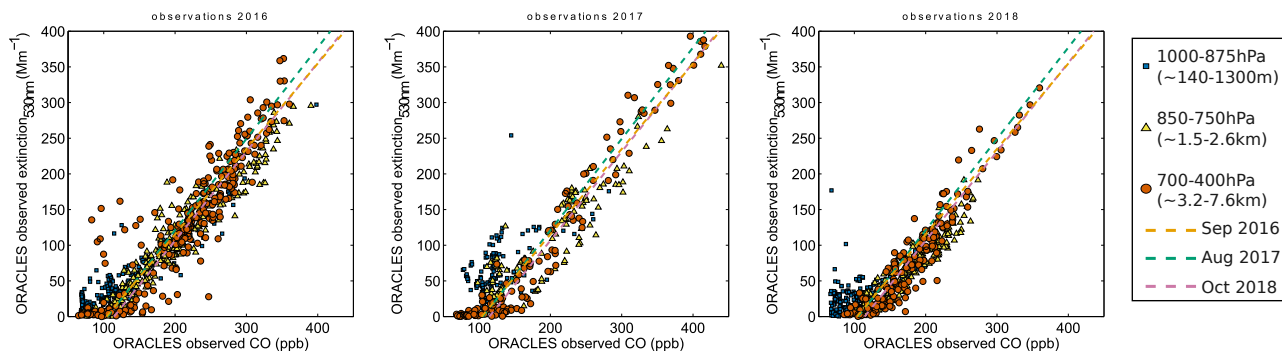

**Figure 5.** Inlet-based observed CO and aerosol extinction (in-situ scattering + absorption) for ORACLES deployment, for the same profiles shown in Figures 2-4. The  $R^2$  correlations are  $>0.9$  for plume level ( $>700\text{hPa}$ ) for 2017 and 2018, and  $R^2=0.83$  for 2016. The lower 2016 correlation was due to issues with dead air in the nephelometer which produced artifacts while profiling during that deployment. Lines show the total least-squares fits to all data above 3km for each year, and the relationship is consistent throughout the season (slopes of 1.20 to 1.28) despite variability in loading.

### 3.2 Aerosol loading and aerosol optical depth

Ultimately, our interest in characterizing the atmospheric structure in this region stems from a desire to understand and quantify the aerosol radiative and dynamic effects of the BB plume. We have focused on a BB tracer field from the reanalyses (i.e., CO) because, due to the complexities in atmospheric aerosol processing in the real world and in models, CO is a simpler parameter to model accurately compared with speciated aerosol. Of course, this exercise will be only tangential to the radiative question if the CO tracer does not correspond to aerosol loading in the real world. To explore whether this is the case, Figure 5 shows the observed-aircraft-observed CO versus extinction (nephelometer scattering plus PSAP absorption; Section 2.1.3), subset to the same profiles as Figures 2 to 4. There are a few outlier points in 2016 (during this deployment, the nephelometer had an issue with dead air when entering or exiting the plume altitudes), but overall the correlations are strong ( $R^2 > 0.9$  for 2017 and 2018, and 0.83 in 2016). Importantly, the slopes themselves are consistent year to year (dashed lines; total least-squares fit slopes of 1.20 to 1.28 over the three months) suggesting the CO-aerosol extinction relationship does not exhibit a significant seasonal dependence, at least for these dried, inlet-based measurements.

Figure 6 shows comparisons between 4STAR-measured AODs and CAMS AOD (both at 550nm) for the same profile locations. Note that we show both reported "total" CAMS AOD as well as the sum of the CAMS-reported organics and BC components of AOD, to isolate the BB plume signal from potential other sources such as sea salt. Sea salt in particular is

15 likely to be excluded from much of the ORACLES AOD measurements, which only include above-aircraft column AOD due to 4STAR viewing geometry.

Figure 6 shows the variation in correlations and spreads for the different deployments. Contrasting the years, we see a poorer correlation and greater spread in CAMS-4STAR differences in September 2016 compared to later years (direct differences [and their distributions](#) are shown in Supplementary [Figure S2-Figures S2 and S3](#)). Table 2 summarizes the correlations, slopes, and agreement between the observations and the CAMS BB AOD. All years share some features: for all years, using only BB aerosol types in CAMS brings the average more in line with the observations compared with "total" AOD, but this offset is reasonably consistent across all data. Also, in all years, particularly for higher loading conditions, CAMS tends to overestimate AOD relative to 4STAR, a curious feature since, as shown previously, CAMS tends to underestimate CO concentration particularly for higher loadings (Figs 2 to 4). As noted in Section 2.2, ~~additional~~[the the assimilated](#) satellite-observed aerosol is total-column AOD, ~~and-whereas~~ CAMS aerosol is ~~then~~[partitioned into a speciated model, with aerosol and chemistry largely independent of one another \(Inness et al., 2019\), and then summed to column AOD](#). Because of this, and previous results showing that total AOD from MODIS in this region is greater than that observed from aircraft due to the difficulties in retrieving aerosol above cloud (LeBlanc et al., 2020), it is not surprising that CAMS overestimates AOD relative to the aircraft observations, as the CAMS AOD is a less constrained parameter [than CO](#).

15 Regardless, the majority of the available comparisons agree within  $\text{AOD} \pm 0.2$  of one another ([Figure S2; Table 2](#)), ~~although CAMS tends~~[Table 2; Figures S2, S3](#), ~~despite the tendency of CAMS~~ to overestimate AOD relative to 4STAR in all years, even when only BB AOD is considered. We note that Cochrane et al. (2022) found that aerosol heating rate increased by  $\sim 0.5$  K/day per 0.1 increase in AOD, suggesting that it is worth further characterizing the nature and impacts of a disagreement of this magnitude. Potential sources of uncertainty from the 4STAR measurements include only partial columns due to aircraft altitude; indeed, it is particularly evident in the 2016 and 2017 panels of Figure 6 that the higher altitudes (yellow points, i.e., a smaller fraction of a "full column") tend to show the largest negative deviations compared with CAMS, possibly due to 4STAR missing below-aircraft AOD contributions. Differences in spatial sampling may also contribute to the year-to-year differences.

In terms of column aerosol measurements, Pistone et al. (2019) demonstrated that 4STAR AODs, while generally consistent with other measurements of optical depth, tended to be slightly larger than co-located values by other measurement methods (there, integrated column extinction from inlet-based instruments and remotely-sensed measurements from downward-looking sensors), likely due to the differences in viewing geometry. Chang et al. (2021) showed good agreement both between the 4STAR AOD and HSRL-2 AOD products, and between 4STAR and several satellite-derived (MODIS and SEVIRI) ACAOD products, for conditions of close temporal collocations. Under more relaxed temporal agreement constraints, when compared just with two different MODIS ACAOD algorithms, 4STAR tended to report slightly lower ACAOD than one, and slightly higher than the other. The authors concluded that these results suggested aerosol loading conditions over the SEA can vary substantially within a 3-hour time period, which may also help to explain the poorer agreement of the 3-hourly CAMS reanalysis relative to the hourly ERA5 results for  $q$ , although the AOD results in Figure 6 are not altered by excluding profiles with the greatest temporal mismatch between reanalysis and flights.



**Table 2.** Agreement between CAMS AOD (organic + BC) and 4STAR ACAOD for the profiles shown in Figure 1 from each ORACLES deployment. All correlation coefficients are significant with  $p < 0.0001$ .

| year                       | 2016        | 2017       | 2018       |
|----------------------------|-------------|------------|------------|
| fit                        | 1.08x+0.002 | 0.89x+0.10 | 1.43x-0.09 |
| $R^2$                      | 0.34        | 0.64       | 0.74       |
| $R$                        | 0.59        | 0.80       | 0.86       |
| # points                   | 73          | 41         | 39         |
| $ \Delta\text{AOD}  < 0.1$ | 52%         | 66%        | 79%        |
| $ \Delta\text{AOD}  < 0.2$ | 84%         | 88%        | 97%        |

Interestingly, when we consider CAMS column CO versus column BB (organics + BC) AOD, the relationship does vary with season (example shown in Supplementary Figure S4). For each of the deployment years 2016-2018, the October data show a steeper slope (i.e., more AOD per unit CO) than do the earlier months, similar to the pattern shown in Figure 2 vs Figure 4. This is not inconsistent with Figure 6, considering the contributions of the boundary layer to modeled column values, and this could potentially also be affected by aerosol hygroscopicity, which is included in the CAMS aerosol scheme (Inness et al., 2019; Morcrette et al., 2009) and which would likely be more prominent in the more humid October months. We note that Shinozuka et al. (2020) concluded that 90% of free-tropospheric ORACLES-2016 measurements were not significantly affected by hygroscopic swelling ( $f(RH) < 1.2$ ) although ~~this effect was~~ hygroscopicity effects were more pronounced in PBL measurements ( $f(RH) > 2.2$  for half the valid inlet-based measurements). Hygroscopic swelling would not be a factor in the inlet-based aircraft measurements (Figure 5) which have been dried to  $RH < 40\%$ . ~~These~~ Overall, these considerations complicate studies using modeled or observed aerosol extinction, which explains our approach of using a CO tracer while also emphasizing the importance of field measurements in the region.

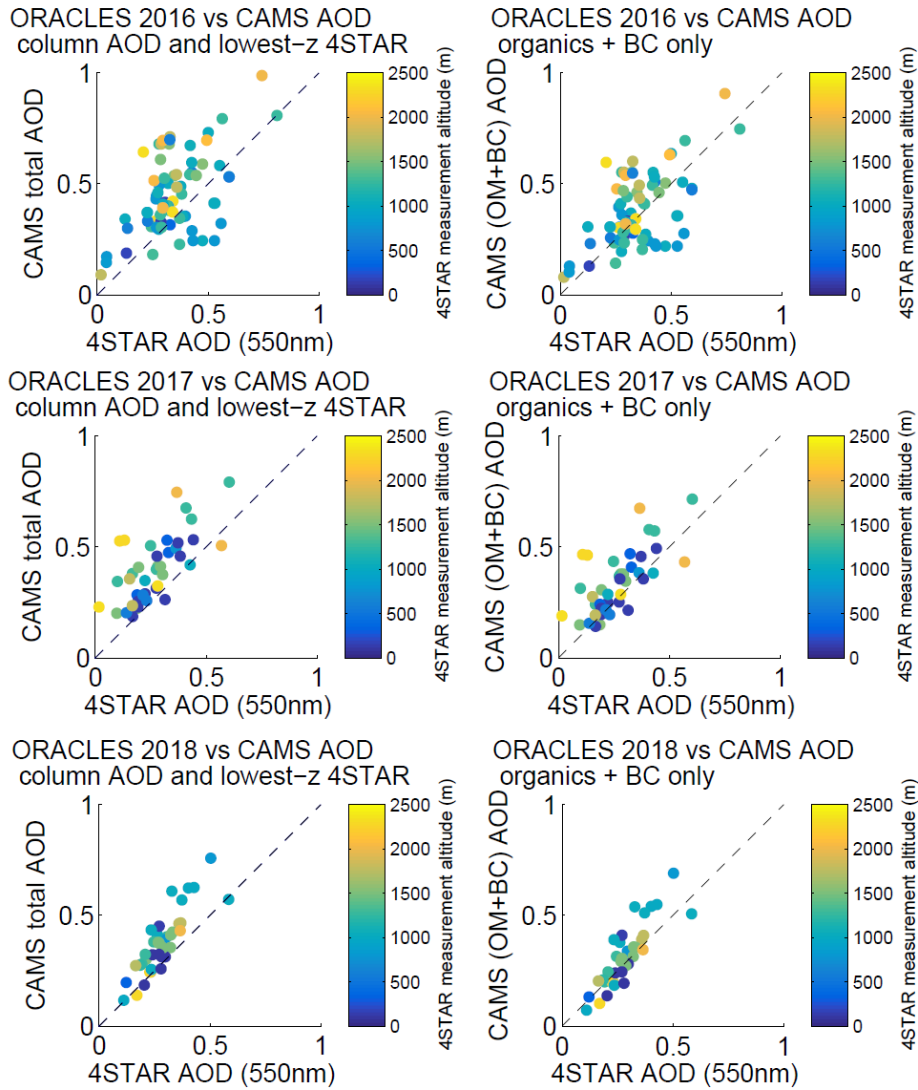

**Figure 6.** 4STAR to CAMS, for 2016 (top), 2017 (middle), and 2018 (bottom) deployments at the location of aircraft profiles (Figure 1) for total (left) and BB-only (right) CAMS AODs. Colors indicate the altitude of the aircraft measurement (i.e., the lowest value in the given aircraft profile); the observed AOD is for the column above this altitude, compared to the full-column values reported by CAMS. Dashed lines show the 1:1 line.

#### 4 Spatial and temporal incidence of atmospheric vertical profiles: k-means analysis

Despite the considerations discussed above, our analysis shows a general good agreement between the ORACLES aircraft data and the ERA5 and CAMS reanalyses from all three deployments. These products are thus useful to the end goal of a more complete characterization of the atmospheric structure of the region as a whole. We approach this section with the goal of being able to characterize the frequency of profiles over the SEA region as a whole and climatologically during the BB season, ~~not~~ beyond solely during flight periods and locations.

To accomplish this, we performed a k-means cluster analysis, similar to the methods used by Schelbergen et al. (2020), on the full reanalysis subset of 3-hourly August, September, and October data from 2014 through 2020, from the equator to 30°S and 15°W to 12.5°E (i.e., near to the coast without including land). We use vertical pressure levels between 1000hPa to 400hPa, giving 18 levels of  $q$  from ERA5, and 10 levels of CO from CAMS. First we perform a principal component analysis separately for  $q$  and CO by decomposing the full set of all profiles for each variable into two principal components describing the variability of the ~~profile (principal components shown in Supplementary profiles. The ranges of values classed in to each profile cluster are shown in Supplementary Figure S5, and the principal components are shown in~~ Figures S6 and S7). Then the distribution of ERA5 profiles in the phase space of the two principal components is passed to a k-means clustering algorithm to arrive at a set of canonical profiles for each variable. For each variable, six clusters (shown in Figures 7 and 8) were determined from the two principal components, whose variability corresponded to (1) total concentration (i.e., profile q1 vs q2 vs q3) and (2) the ratio of upper-level ( $\sim 600-700$ hPa) to lower-level ( $\sim 900$ hPa) values (i.e., q1 vs q4 vs q6; distributions across-varying across each of the two principal components for  $q$  and CO are shown in Supplementary Figures S8 through S11). The profile labeling corresponds roughly to the column concentration, i.e., q1 is the most humid and q6 is the driest; C1 has the highest CO concentrations and C6 has the ~~least~~lowest. We chose a 6-cluster configuration as with this number we were able to adequately capture the variability of conditions (described below), while limiting the number of defined profiles for ease of interpretation. ERA5 outputs subsampled to the CAMS spatial resolution produce similar results, and the k-means cluster method produces similar results (i.e., the same general types and range of profile types) for slight differences in the spatial domain of the data used in the analysis and for the number of clusters chosen. A silhouette analysis of various configurations between 3 to 9 clusters suggests the addition of more clusters is no more optimal compared with the 6-cluster configuration.

The identified profiles span the range in conditions seen spatially and through the BB season. For water vapor (Figure 7), there is a range in both total concentration and vertical structure across the six profile types. In terms of water vapor concentration, the range in surface  $q$  varies from 7.8 g/kg to 14.9 g/kg, with q6 and q5 being the driest profiles and q1 and q2 being the most humid. At the plume level ( $\sim 700$  hPa),  $q$  ranges from 7.2 to 1.0 g/kg across the 6 profiles, and all profiles approach 0 above 500hPa (0.2 to 0.5 g/kg at 400hPa). Profiles q5 and q6 are also similar in that they both have a dry free troposphere ( $> 800$ hPa, or  $\sim 2$ km); the principal differences distinguishing the two are a more humid/slightly deeper BL in q5, and the presence of a dry air gap in q6, with slightly greater humidity at 600-700hPa compared with at 800hPa.

Regarding vertical structure, two of the profiles (q1 and q2) are structurally similar, with a very humid PBL (with  $\sim 2$ g/kg difference in surface  $q$ ) below a constant monotonic decrease in  $q$  with altitude. Two other profiles (q6 and q4) feature a dry gap

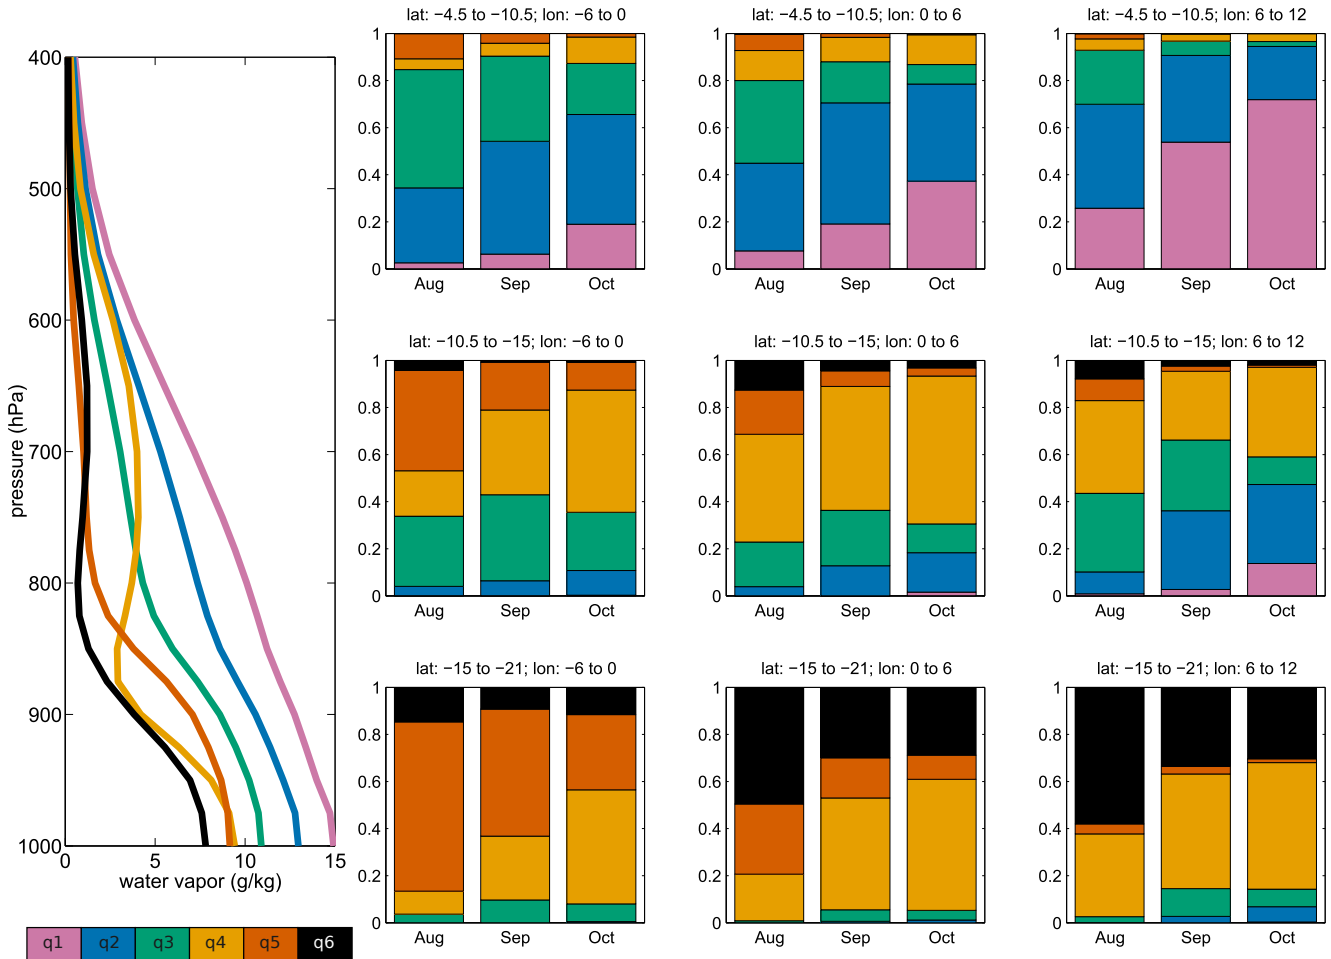

**Figure 7.** (left) The six k-means profile types determined from ERA5 reanalysis water vapor. (right) Fractional incidence of k-means water vapor classifications, by month, for ERA5 August-October 2014-2020. The grid corresponds to the black outlines in Figure 1d. Note that the top and middle rows correspond to the AEJ-S latitudes ( $5^{\circ}\text{S}$ - $15^{\circ}\text{S}$ ), with the top row slightly extended to align with the CAMS  $0.75^{\circ}$  resolution used in the following Figure.

at the top of the PBL with increased humidity above (600–800hPa), with  $\theta$ -q6 being the driest profile overall; again the surface  $q$  difference is slightly less than  $2\text{g/kg}$  between the two. The final two (q3 and q5) are intermediate; they show a well-defined boundary layer and a layer of more uniform humidity above. The remainder of Figure 7 shows how the distribution of these profiles varies over the region.

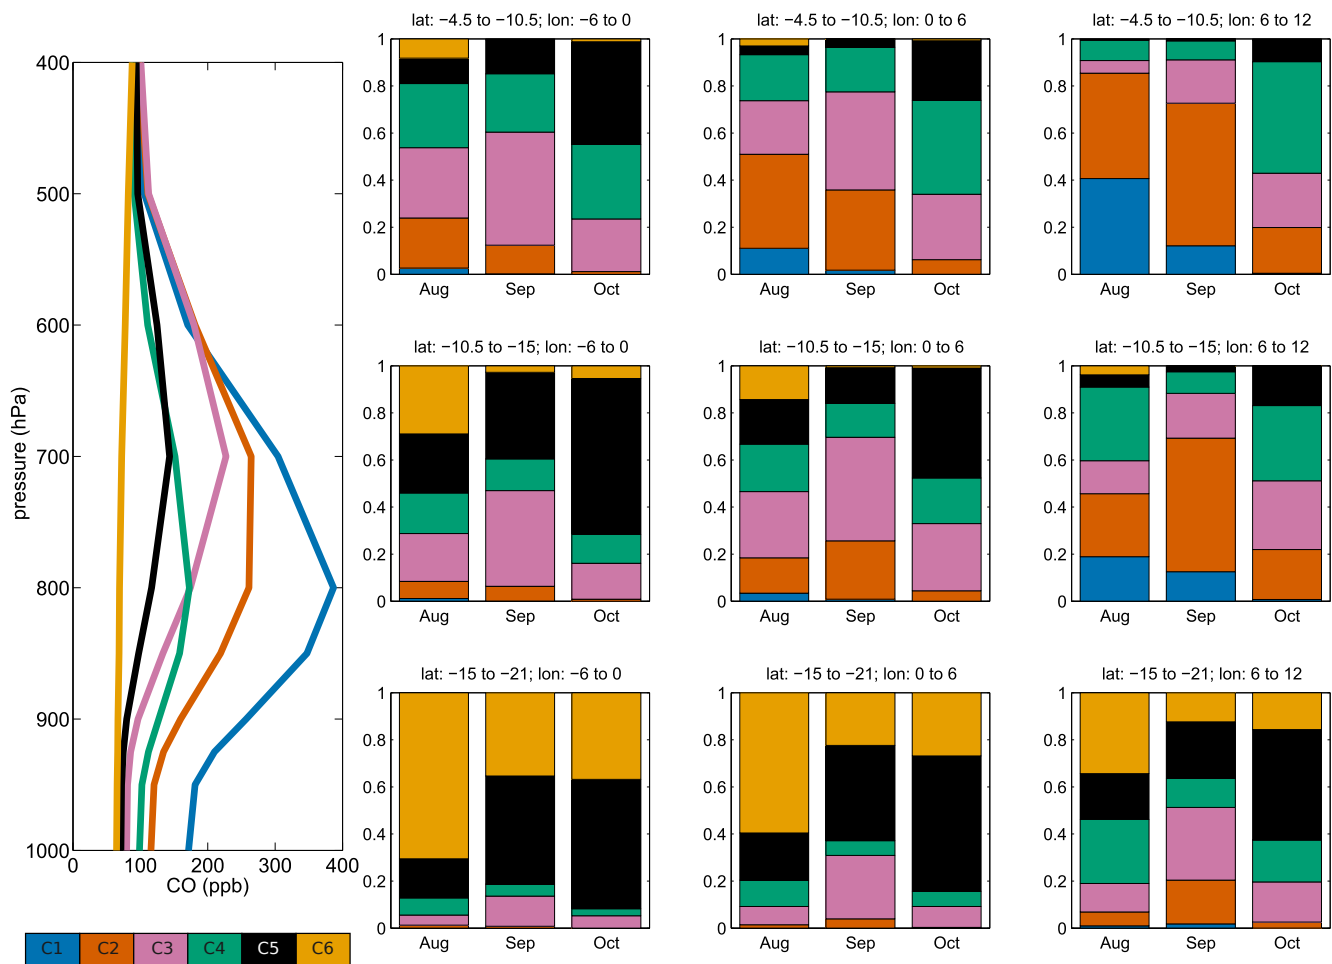

**Figure 8.** (left) The six k-means profile types determined from CAMS reanalysis CO. (right) Fractional incidence of k-means CO classifications, by month, for CAMS 2014-2020 for the regions shown on the black grid shown in Figure 1d.

There are notable spatial and temporal variations in the incidence of the profile types. Figure 7 shows the fractional incidence of each water vapor profile within the gridded SEA region (Figure 1d), for each month. Given the continental source of the water vapor and the seasonal evolution seen in the aircraft data, it is not surprising that the most humid profiles (q1 and q2) are most frequent in the northeast of the SEA basin (4.5-10.5°S, 6-12°E); ~~the most humid profiles (q1 and q2) are most frequent.~~ The most humid, q1, increases in frequency as the season progresses, from 26% of August profiles within this domain to 54% in September and 72% of October profiles (50% overall). ~~Considering~~ If the sum of the two most humid profiles (q1 and q2) are considered together, 70% in August and 94% in October (85% overall) of the profiles fit ~~this classification~~ these classifications. This is consistent with continental influence in these domains, as well as warmer sea surface temperatures in the northeast compared to the rest of the region (e.g., Zuidema et al., 2016).

The northern sectors farther from the coast (10.5-15°S, 0-6°E and 6°W-0°E), also have a high incidence of the high humidity profiles (q1 and q2), with the frequency dropping off with distance from the continent (i.e., 21% q1 and 43% q2 overall in the middle region and 9% q1 and 42% q2 in the west-most region shown). This is again consistent with a pattern of continental outflow of humid air which experiences a gradual mixing with less-humid airmasses as it moves over the SEA basin. There are also significant differences in air mass transport based on altitude, due to the presence of the AEJ-S in this region, with ~~a~~ the AEJ-S maximum in the northeast sector and 600-700hPa (Figure 9). The AEJ-S weakens further from the coast, and a northerly component of the wind interrupts the direct-westward transport and brings the humid outflow to higher latitudes at those altitudes, which may be responsible for the high incidence of profile q4 in the middle of our study region.

Further south (Figure 7, bottom row), the atmosphere is significantly less humid. In the southwest sector (15-21°S, 6°W-0°E), q5 is dominant, making up 52% of profiles over the three months (72% of August, 54% of September, and 32% of October profiles). This condition is most common in August and far-from-coast, likely due to dry air intrusion from the southwest (Ryoo et al., 2021) and more limited contribution of airmasses from the continental source ~~as in much of the rest of the Southeast Atlantic~~. South of the AEJ-S latitudes, profile q4 is also ~~frequent~~ frequently present (28-45% over all months) and the q6 profile is increasingly common (36-40% in the bottom center and bottom east boxes: 15-21°S, 0°E-12°E).

In this visualization of water vapor profiles shown in Figure 7, one can see two different air masses sourced into this region: the humid, monotonically-decreasing airmasses enter from the northeast and ~~moving~~ move south and west in the AEJ-S (q1, q2), and the dry, more uniform airmasses above the boundary layer ~~in the southwest, moving~~ enter from the southwest and move north and east (q5, q6); ~~and the~~. The middle row of Figure 7 is where they meet. Indeed, profiles q5 and q6 are uncommon north of 15°S (with the exception of the western sector, with 43% q5 in August, 25% overall), and similarly profile q1 is much less common south of 10.5°S, comprising only 6% of the total profiles, and those mostly in October (1% August, 3% September, and 14% October). An additional quarter of profiles are classed as q2 in this near-coast region. Profile q1 is almost entirely absent further from the coast (<2% in 0-6°E) at this latitude range; these patterns are all reasonable with the climatological transport described above.

In the poleward half of the AEJ-S latitudes (10.5-15°S, ~~6-12°E~~; middle row), q4 is the predominant profile type in particular in the middle region (10.5-15°S, 0-6°E); ~~there it is~~ 54% averaged, and of all profiles overall, and is fairly consistent month to month ~~with~~ (46% in August, 53% in September, and 63% in October). This profile with an elevated humidity layer of

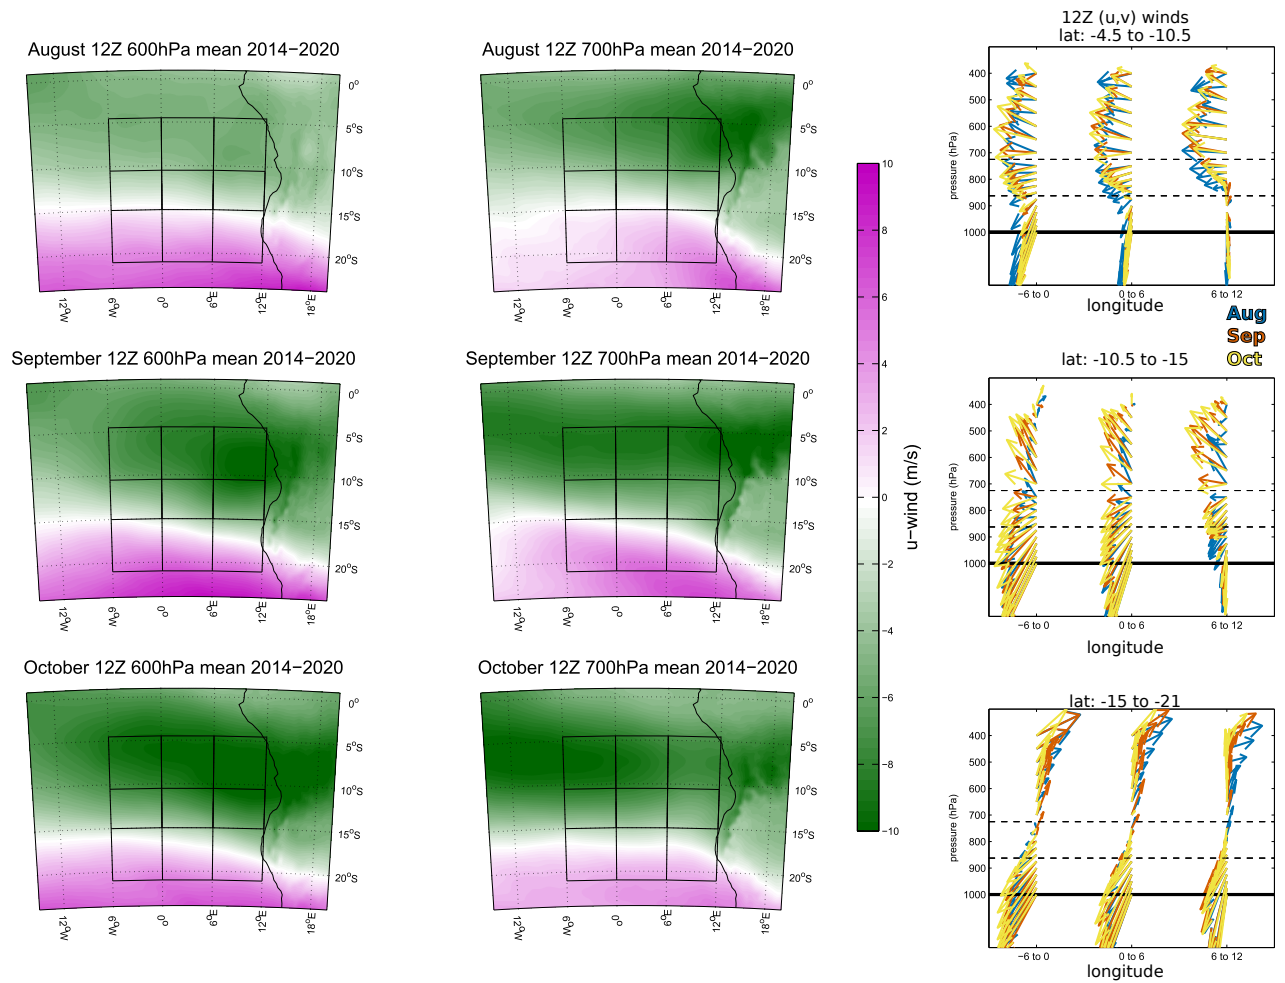

**Figure 9.** Monthly-averaged zonal winds at 600hPa (left) and 700hPa (middle), corresponding to the AEJ-S altitudes for September/October and August, respectively. The easterly transport north of 10 – 15°S is evident. (Right) Monthly-averaged profiles of wind (u,v) at the ERA5 pressure altitudes for August (blue), September (orange), and October (yellow), in the same grid. Dashed horizontal lines show the altitude subdivisions used in Figs 2 to 4. The northerly motion is evident at the lower altitudes (below 700hPa).

35  $\sim 5\text{g/kg}$  around  $\sim 650 - 800\text{hPa}$ , and a drier gap above the (again more humid) boundary layer likely results when an elevated humidity air parcel moves with AEJ-S velocity while being subjected to vertical subsidence, whereas drier air at lower altitudes originates from another, non-continental source ~~-(likely southwesterly winds). This is supported by the zonal wind patterns shown in Figure 9.~~ Profile q4 is also common over much of the southernmost part of the region (~~28-41~~28-46% south of ~~10.5°~~15°S), and increases throughout the season. The fact that a less-humid gap is present between free tropospheric humidity and boundary layer humidity highlights the air mass sourcing as over the continent at high altitude. Overall, this means that for ~~these the~~ higher latitude regions (south of  $10.5^\circ\text{S}$ ), ~~the jet-altitude air appears~~ air masses at jet altitude appear to more frequently originate from ~~high altitude in higher altitudes to~~ the north rather than from the continent directly to the east. This anticyclonic transport was also observed in the trajectory analysis in Pistone et al. (2021) and illustrated in Redemann et al. (2021); Ryoo et al. (2021).

10 Profile q3, of intermediate total humidity with a humidity gradient at the PBL top, may be seen as a less-humid evolution of q1 or q2, likely resulting ~~from a similar mechanism of~~ mixing of continental air above  $\sim 850\text{hPa}$  ( $\sim 1.5\text{km}$ ) with drier airmasses as the continental air moves farther from the its source (as with q4). Within this middle latitude range, q3 is ~~a consistently~~ consistently a significant though not dominant fraction of the profiles (10-36%), with prevalence increasing with distance from the coast and decreasing through the season (August to October) as overall humidity increases.

15 ~~While profiles q5 and q6 are uncommon north of  $15^\circ\text{S}$  (with the exception of the western sector, with 43% q5 in August, 25% overall), and similarly profile q1 is much less common south of  $10.5^\circ\text{S}$ , comprising only 6% of the total profiles, and those mostly in October (1% August, 3% September, and 14% October). An additional quarter of profiles are classed as q2 in this near-coast region. Profile q1 is almost entirely absent further from the coast ( $<2\%$  in  $0-6^\circ\text{E}$ ) at this latitude range; these patterns are all reasonable with the climatological transport described above. Considering only this~~ Considering only the water vapor picture, the story is ~~fairly straightforward, but the~~ thus fairly straightforward—humidity enters at the AEJ-S outflow region, and circulates in the FT, increasing through the season—but the biomass burning tracer adds more complexity to the picture.

The conditions captured in the 6 k-means-defined CO profiles (Figure 8) are somewhat less varied in structure than those for  $q$ . While it may seem counterintuitive that two parameters so closely correlated exhibit different vertical structures, this is due to the (above background level) CO in this region indicating an air mass origin over the smoky continent, whereas  $q$  in this region may originate either on the smoky (and humid) continent or from evaporation from the ocean surface. Essentially, despite their different shapes, the two sets of k-means profiles show the same feature: a variation in (humid smoke) plume altitude and vertical extent, always with a more-humid and less-smoky boundary layer underneath. Regardless, for the CO profiles there is still variability in BL CO (~~66 to 950ppb~~), ranging between 63 to 178ppb for 950-1000hPa, with mean values nearly constant for a given profile), but the primary difference is the range at in the free troposphere, from high concentration 25 ( $\sim 400\text{ppb}$ ) to a background value of 60-70ppb. The peak concentration is seen either at 700 hPa (C3, C5) or 800 hPa (C1, C4), with C2 nearly uniform across this range ( $\sim 2 - 3.2\text{km}$ ). This is lower in altitude than the typical maximum of the south African Easterly Jet (AEJ-S) ~~which is~~ at 600-700hPa ~~-(Adebiyi and Zuidema, 2016; Pistone et al., 2021; Ryoo et al., 2022); the coarse pressure level resolution of the CAMS reanalysis~~ may be a is likely a limiting factor, plus there is a degree of vertical



subsidence with time over the region ( $\sim 50 - 80\text{hPa/day}$ ) which is seen in both the reanalysis and the observations, as was previously shown.

We note that a curious outcome of applying this method to CO profiles is that profile C6 (the background/smokeless case) shows slightly increasing CO with increasing altitude, from 65ppb at 1000hPa to 88ppb at 400hPa. We suspect this may not be a real characteristic of the atmospheric structure, ~~(as the continental outflow peaks around 500hPa and there is large-scale subsidence over the ocean, it would be puzzling for there to be a maximum in CO above this altitude)~~, but rather may be an artifact resulting from limitations in the CAMS satellite assimilation. Previous studies have documented low biases in CO in the lower and middle troposphere when compared with aircraft profiles (e.g. Inness et al., 2019, 2022). Specifically, Inness et al. (2019) showed consistent low-biases of 10-20% in CAMS reanalysis CO between 600hPa and the surface, for all airport sites considered. While the Windhoek, Namibia (i.e., closest geographic to our study area) site showed **consistent discrepancies** a fairly constant low bias through these altitudes ~~with only a slight decrease in magnitude (with a slight improvement in the reanalysis-observation bias near the surface)~~, other sites show a pronounced increase in the negative bias at the lower altitudes relative to higher in the troposphere. The complicated atmospheric structure in this region makes it plausible that this may also be occurring in the present case. In other words, profile C6 is not showing a true decrease in CO with  $z$ , but rather an unphysical artifact in an actually-constant-CO atmospheric structure. Manual inspection of some C6 profiles indicate the presence of a small CO layer in some cases, and a more uniform profile in others, **suggesting this** ~~but the majority of profiles classed as C6 fall close to this profile structure (Figure S5). Taken together, the evidence suggests this result~~ may be a limitation of our k-means classification method, ~~which causes such~~; ~~by aiming to identify a limited number of profile conditions, some~~ less-smoky profiles ~~to be with somewhat varied structure end up~~ collapsed into one **case**. ~~The effectively smokeless case (i.e., close to background CO values at all altitudes). Inness et al. (2022) also mention that the underestimation of CO is a common problem in many atmospheric chemistry models, although we note that the~~ minimum CO observed (i.e., background) by aircraft during ORACLES is around 60ppb, closer to the low-altitude values in this profile, which suggests instead a potential overestimation in CAMS CO at higher altitudes rather than an underestimation at the lower altitudes. ~~(A full quantification of the sources of uncertainties in the reanalysis is beyond the scope of the present work.)~~ Nonetheless, the ~~presence at times demonstrated presence~~ of an effectively smoke-free atmospheric profile (C6) is consistent with expectations in this region, ~~and is a useful case study towards our goal of a broader, and necessarily simplified, classification of the complex and varied atmospheric states in this region.~~ We will leave the specific implications of the particular shape and incidence of C6 for a future work. Overall, this k-means method produces a range of profile types which are consistent with the observations across the SEA.

The CO profile classifications (Figure 8) are in many ways more straightforward than those of  $q$ , but their spatial distribution is more complex. Compared with the  $q$  distributions in Figure 7, the CO distributions are somewhat less continuous throughout the season, although some general patterns are still clear. The northeasternmost sector (4.5-10.5°S, 6-12°E) has the highest percentage of high-CO profiles, although the incidence of these profiles (C1 and C2, respectively) shows a seasonal trend opposite to that of  $q$ . Specifically, CO concentration is greatest in August and decreases in October, contrasting the increase in  $q$  over this time. The profile frequencies for that sector are 41% (C1 only) and 85% (C1 or C2) in August; in September, C1 alone drops to 12% frequency, but the summed frequency of C1 plus C2 is still 73% overall. By October, less than 0.5%

35 of profiles are classed as C1, and only around 19% are classed as C2. In other words, even as the water vapor increases from August to October, the CO (and by proxy, smoke) decreases dramatically, providing an opportunity to better examine the impacts of the dynamic range of the two profiles together.

There are other features which distinguish the distribution of CO profiles from that of the  $q$ - $q$  profiles. There is a notable lack of a consistent trend across a three-month season within a specific region, particularly south of  $10^{\circ}\text{S}$ , in contrast to the  
5 consistent increase in  $q$  (and increase in associated  $q$  profile types) in all regions. Instead, the CO profiles often peak (or trough) in September, with lower (or higher) ~~values-incidence~~ in August and October (e.g., C3 in the northern and middle latitudes far from coast, and C2 near coast); alternatively, in other sectors the CO values increase (e.g., C5, south of  $10.5^{\circ}\text{S}$ ) or decrease (e.g., C6, in the south) through the season. CO profiles in the middle and southern sectors are more likely to be classed as one of the more smoky profiles in September than in August or October, despite the progression of more- to less-  
10 smoky in the more northern regions. By September, almost all profiles north of  $15^{\circ}\text{S}$  have some CO between 500-900hPa, while south of  $15^{\circ}\text{S}$ , 12-35% of profiles are still classified as "unpolluted" (C6), again likely due to intrusion of southwesterly airmasses (Ryoo et al., 2021). Some expected seasonal patterns are still evident; despite significant frequency of smoky profiles especially in September, by October, the middle-west region is dominated by the cleaner profiles (72% here are C6 or C5, i.e. one of the two least smoky profiles), and the northwestern and middle regions are almost half (45% and 48% respectively) C5  
15 or C6. This reflects the decreased amount of smoke available for circulation later in the season ~~even-as-the-humidity-due-to-a-combination-of-seasonal-factors, e.g., seasonal changes in burning patterns, namely the southeastern progression of detected fires (e.g., Redemann et al., 2021); a potential an increase in smoldering versus flaming burn conditions (e.g., Eck et al., 2013) into October-November; and the more frequent precipitation events at AEJ-S latitudes in October (Ryoo et al., 2021). These changes in BB conditions occur as the high-humidity~~ profiles become more frequent in these same regions ~~at-over~~ this time  
20 (Figure 7)~~and-monthly-average-jet-strength-persists-~~, following the increasing incidence of moist convection over the southern African continent (Ryoo et al., 2022). A strong AEJ-S condition also persists in all months (Figure 9).~~This-~~, ensuring these continental airmasses move over the SEA throughout this season. Taken together, this does not mean that ~~this more-remote region-is-not~~ the more remote areas of the SEA region are never influenced by the seasonal biomass burning plume (indeed, this sector contains St Helena Island, whose smoke and humidity vertical structure are studied by Adebiyi et al. (2015) and others,  
25 and the Ascension Island observatory is located to the west of the northwesternmost sector we consider, i.e. even more removed from the source); but the presence of smoke there is more episodic. ~~By September, almost all profiles north of  $15^{\circ}\text{S}$  have some CO between 500-900hPa, while south of  $15^{\circ}\text{S}$ , 12-35% of profiles are still classified as "unpolluted" (C6), again likely due to intrusion of southwesterly airmasses (Ryoo et al., 2021). This rather than a consistent plume. Overall, this~~ variability indicates the importance of the combined effects of atmospheric circulation patterns over the region (Figure 9), the accumulation of CO  
30 due to its longer atmospheric lifetime, and the seasonal shifts in both fuel type and fire location through the season (e.g., Che et al., 2022).

Viewing the SEA atmospheric structure in this way gives us 36 different potential smoke/water vapor combined structures, but fortunately there are fewer in reality. Figures 10, 11, and 12 show the frequency of CO- $q$  profile combinations for each month divided into the same latitude/longitude sectors. Again, profiles are ordered from nominally least to most CO and  $q$  on

35 their respective axes. The results are consistent with those shown in Section 3 using data from from the ORACLES flights: while there is a range of combinations in all months, the highest frequency combinations fall along the low-low/high-high continuum. The patterns of Figures 7 and 8 hold as well: the southernmost zones have the greatest incidence of clean and dry profiles from the southwest. The high-high conditions ( $q2/C2$ ) are seen to be most frequent mid-season in September, and the latitudes of the AEJ-S have the greatest CO and vapor, decreasing with distance from the coast and with time.

5 There is a good deal of spatial and temporal variation to how these profiles covary. For example, in August (Figure 10), moving from east to west along the northernmost sectors (following the AEJ-S outflow), there is a relatively disperse range of conditions that are generally high- $q$ , high-CO combinations at around 10% each (i.e., medium/high:  $q2/[C3,C4]$ ,  $q3/[C2,C3,C4]$ ), although the  $q2/C2$  condition is still a frequent combination especially nearest to the coast ( $\sim 20\%$ ). In the middle latitudes, conditions become progressively more distributed along the high-high/low-low continuum,  $q5/C5$ ,  $q4/C5$ ,  $q4/C4$ , again on the  
10 order of 10% each. The maximum frequencies in this range are  $q5/C6$  (with a maximum of 24% farthest from coast) and  $q4/C3$  (21% middle-longitudes). To the south, the low-CO, ~~low- $q$~~  low- $q$  conditions ( $q5/C6$ ,  $q6/C6$ ) dominate more significantly (a combined 70%, 59%, and 33% moving west to east), although episodes of smoky air still occur (27% C4 nearest to the coast), under a range of humidity conditions (for C4, the conditions are fairly evenly split between  $q4$  and  $q6$ ).

In September (Figure 11), the profiles more strongly favor more frequent incidence of fewer combinations in all regions (e.g.,  
15  $q1/C2$ ,  $q2/C2$  are 56% of cases in the northeast, and  $q5/C6$ ,  $q5/C5$  are 51% of cases in the southwest), ~~with greater variation in  $q$  profile type than in CO type.~~ By October (Figure 12), when the highest-CO (C1) profiles are almost entirely absent, the most common northeastern coastal profile is high humidity, medium-low CO (i.e.,  $q1/[C2,C3,C4]$  at [39%, 12% ~~and~~, 12%] for a total of 64% of cases in this range), consistent with the aircraft observations. A good example of the seasonal progression is in the middle-easternmost box, which shows a range of combinations in all months, but progresses from skewed high-CO, ~~low- $q$~~   
20 low- $q$  (i.e.,  $q5/C1$  ~~or~~,  $q6/C4$ ) in August to high- $q$  high- $q$ , low-CO ( $q4/C5$ ,  $q2/C4$ ) in October, with around 10% incidence of each. This presentation also highlights how smokeless conditions are rarely seen after August at the northern AEJ-S latitudes, despite lower smoke emissions in October. We also see an evolution of the overall variability in conditions, with some sectors (e.g., September/October in the south) showing more variability in  $q$  than in CO, while others show more variability in CO than in  $q$  (e.g., August in middle latitudes or October in the northern latitudes). We also note that while clear diurnal cycles in  
25 temperature, potential temperature, humidity, and CO, are evident in the reanalysis over land, these effects are muted once the air is transported over the ocean regions, and there are no significant changes in profile class across the diurnal cycle. The major variations in atmospheric structure seen here are spatial and seasonal, and may reflect the episodic nature of smoke transport ~~in~~ across the AEJ-S (e.g., Ryoo et al., 2021; Pistone et al., 2021). While a bit daunting, this large range of conditions within a limited spatial area offers an ideal framework in which to quantify the radiative impacts of vapor, aerosol, and their various  
30 combinations.

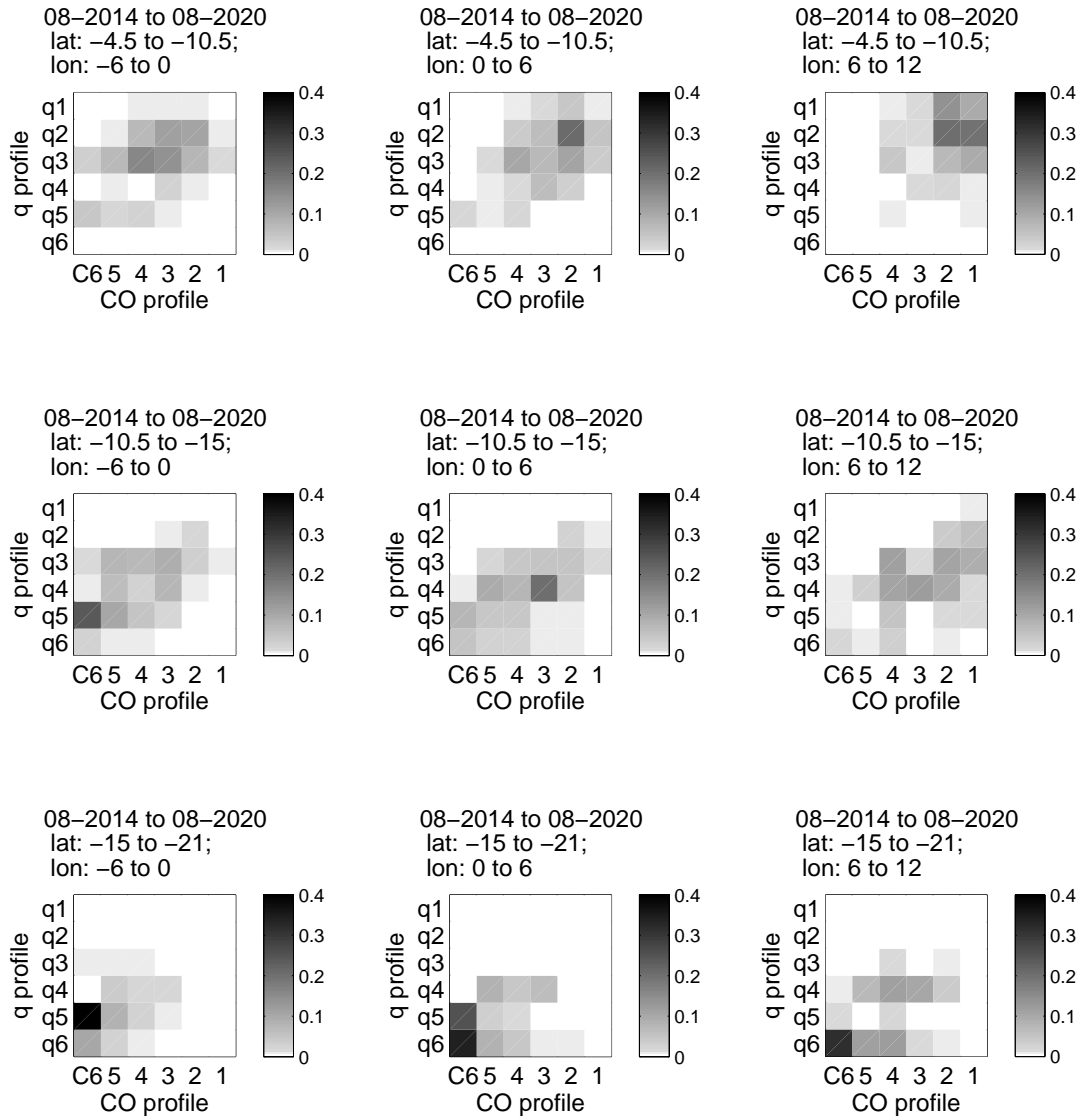

**Figure 10.** k-means classifications  $q$  vs CO, for August. The profiles are ordered from left to right, clearest to smokiest, and from bottom to top, driest to most humid, and are standardized to show the fractional incidence of each profile in the same shading scale for each region. As described in the text, the spatial patterns of the smoke and humidity profiles are evident.

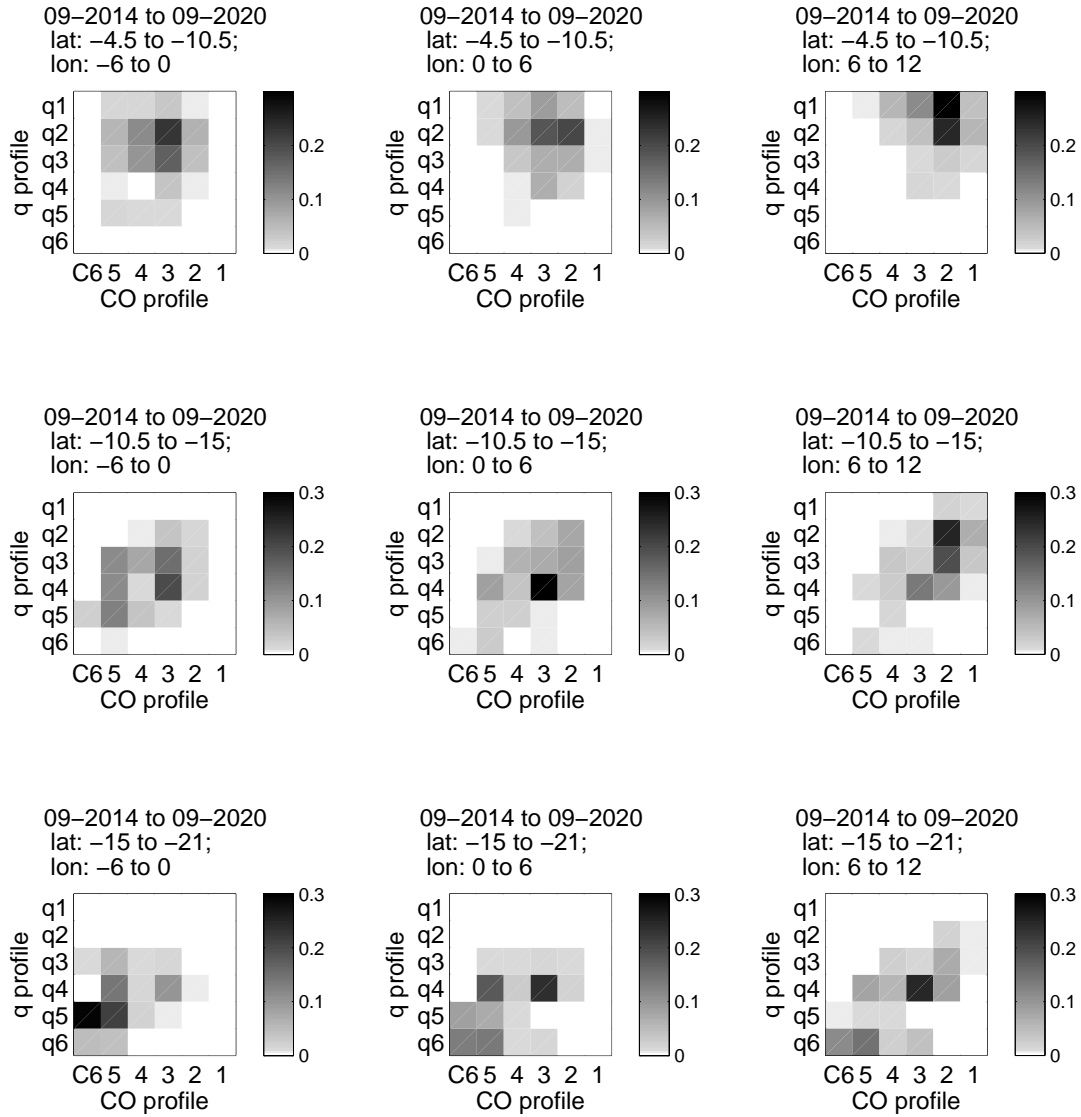

**Figure 11.** As in Figure 10, k-means classifications  $q$  vs CO, for September.

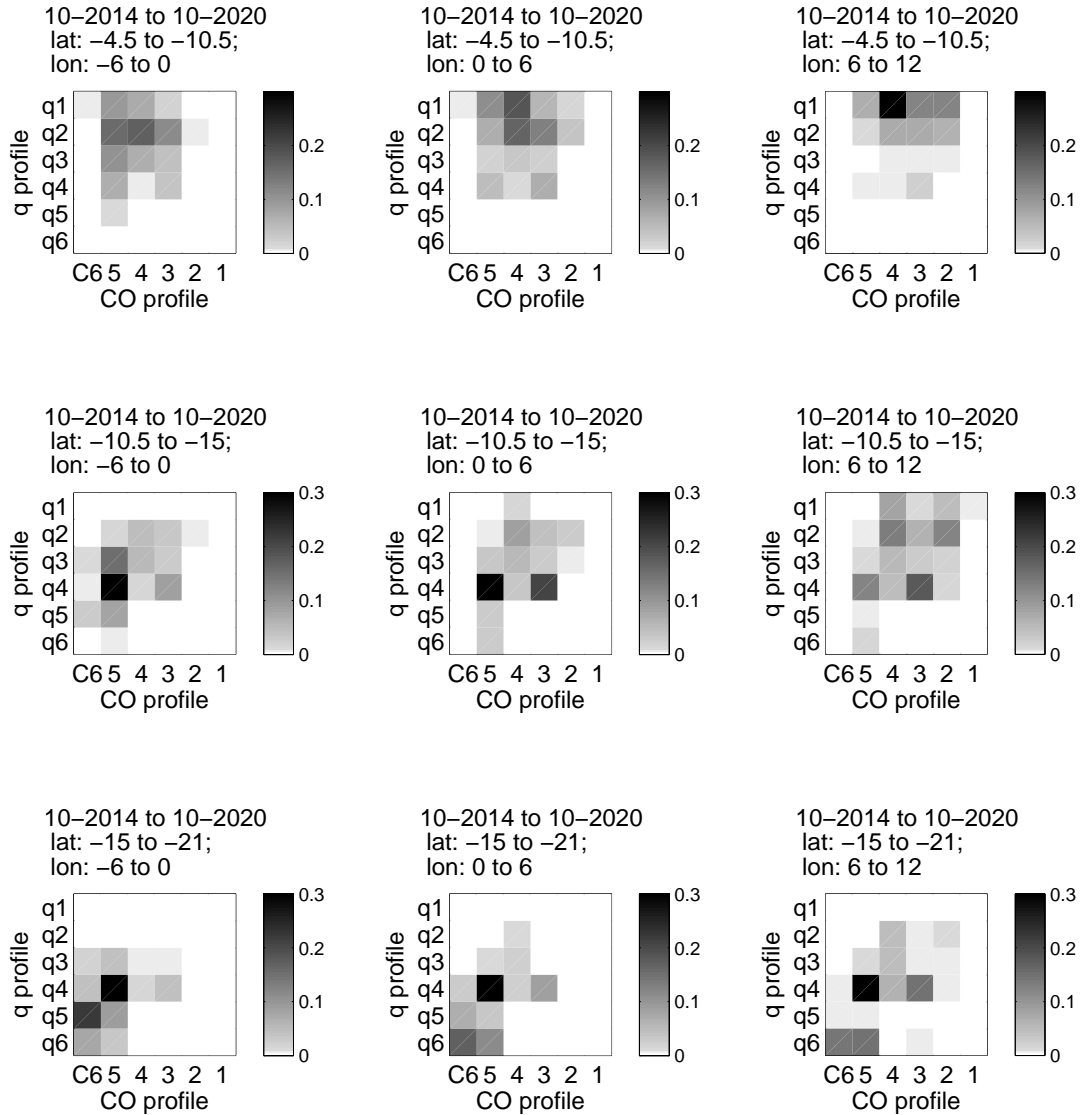

**Figure 12.** As in Figure 10, k-means classifications  $q$  vs CO, for October.

## 5 Discussion

Our work thus far has provided a descriptive characterization for the smoke-vapor relationship, both from targeted aircraft-based field measurements, and in a larger reanalysis-based context. In this section, we aim to place this characterization into the broader analysis context, both to describe its relevance to other studies and to motivate future work utilizing the results presented here.

5 Several previous studies highlighted the importance of examining the aerosol-water vapor covariance over this SEA region, and this work is relevant to those results. As was discussed earlier, Adebisi et al. (2015) used a few idealized case studies (low, medium, and high AOD) based on satellite and radiosonde data at St Helena Island (15.9°S, 5.6°W) to estimate a maximum increase in shortwave heating due to moisture of 0.12 K/day, compared to 1.2 K/day of aerosol SW heating. In the longwave, they found the presence of moisture resulted in a maximum net cooling of 0.45 K/day at the top of the moisture layer, with a  
10 consequent reduction in radiation passing through the humid layer into the boundary layer. Within the context of this current study, we expect these conditions, which fall into the southwest grid box of our framework (Figure 1d), to reflect only a small amount of the total radiative forcing, ~~as-given~~ the higher plume concentrations which are more frequent elsewhere over the SEA.

Deaconu et al. (2019) similarly noted the water vapor and aerosol covariance in their study using POLDER, MODIS,  
15 CALIPSO, and ERA-Interim, but this study focused on the less-humid June-August time frame and specifically were interested in the impacts of this layer on underlying clouds. They found roughly 6 K/day aerosol warming at the aerosol layer for defined high vs low aerosol cases, and a corresponding water vapor effect of 0.76 K/day SW (warming) and -0.14 K/day LW (cooling). We note that both this work and that of Adebisi et al. (2015) chose a framework of essentially "low" or "high" aerosol, rather than a more discretized classification, or one that considers the varying vertical structure of the atmosphere over this region.

20 A more targeted study was performed by Cochrane et al. (2022), who used high-vertical-resolution aircraft data to quantify the aerosol and water vapor heating rates for specific case studies from flights in ORACLES-2016 and -2017. The authors found that for the cases examined, the average maximum aerosol heating rate was 4.6 K/day and that of water vapor was 2.8 K/day, or ~ 60% of the aerosol value and 4-10 times greater than the water vapor heating of the other studies. The cases considered in Cochrane et al. (2022) are noted to have had much higher aerosol loading (AODs typically exceeding 0.4, compared to the  
25 > 0.2 threshold used by Adebisi et al., 2015). The localized nature of each of these previous results highlights the importance of being able to accurately characterize atmospheric conditions over different parts of a given region. We also note that the case studies of Cochrane et al. (2022) are included in the profile-based analysis we present here ~~-(specifically, distributed across the~~ middle/coastal longitude ranges north of 15°S, and in the southeast zone south of 15°S), which will allow us to directly assess the agreement between the approaches.

30 Another recent study from Johnson and Haywood (2023) calculated that BC absorption in models facilitated self-lofting (increase in buoyancy due to aerosol heating), which has various potentially significant impacts on atmospheric dynamics and aerosol lifetime. Over the SEA, they calculated an additional lofting of 0.5km, which may be significant given the consistent subsidence in the region, delaying the eventual mixing into the underlying cloud deck. Finally, a recent study from

Baró Pérez et al. (2023) used large eddy simulations initialized by ORACLES-2017 observations to isolate and quantify the effects of the humid smoke plume on the underlying cloud fields, and concluded that the presence of moisture in the plume overlying the stratocumulus clouds produced a cooling effect of roughly the same magnitude as the total aerosol effect in these cases, highlighting the importance of humidity on the clouds and climate in this region.

Here, we have utilized observational datasets to describe the atmospheric structure of the SEA during the springtime BB season, and to assess how well the unique vertical features of the region are captured in several frequently-used reanalyses. Using different elements of the comprehensive ORACLES airborne dataset, we conclude that the ECMWF reanalyses offer a fairly accurate characterization throughout the season August-October, and that the vertical structure of the CO tracer is a reasonable proxy for aerosol optical effects. These results are important because the radiative conditions vary over the region and with the season. The radiative heating of a given atmospheric layer strongly depends on local insolation/solar zenith angle (e.g. Cochrane et al., 2022) which varies spatially and seasonally. Additionally, by characterizing the spatial (specifically longitudinal) variation of conditions in the region, we may be able to gain a better understanding of the lifetime influence of a particular airmass, i.e., the temporal extent of its radiative influence on the atmosphere/cloud column. This framework allows us to characterize the conditions in a more digestible format, and to construct a more realistic atmospheric frequency distribution. The results of this study can aid in performing radiative transfer calculations in the regions of plume maximum, allowing us to put both isolated aircraft-based case studies and analysis of surface-based measurement sites into broader context. This will be the subject of a future work. Overall, the large range of conditions seen here, validated by the ORACLES aircraft measurements, offers an intriguing opportunity to explore the differing radiative impacts of water vapor in conjunction with a radiatively active BB plume.

## 6 Conclusions

Here, we have explored various aspects of the observed BB layer and co-incident elevated humidity signal over the SEA. We show the observed CO- $q$  relationship is consistent across three field deployments across the BB season, although the magnitude of the relationship varies (slopes of 0.020, 0.023, and 0.05 (g/kg)/ppb for August 2017, September 2016, and October 2018, respectively), due to changing meteorological and BB conditions as the season progresses. Despite the differing locations and timing of each deployment, we have shown that good agreement between the airborne ORACLES dataset and large-scale reanalyses is consistent across the deployments, specifically for the ECMWF ERA5 and CAMS reanalyses.

Consistent with the results of Pistone et al. (2021) for September 2016, ERA5 reanalysis of water vapor agrees well with the ORACLES observations ( ~~$R^2 = 0.78, 0.88, \text{and } 0.91$~~   $R^2 = 0.78, 0.90, \text{and } 0.89$  for September 2016, August 2017, and October 2018, respectively). The CAMS reanalysis also agrees well with observed water vapor ( $R^2 = 0.84, 0.86, 0.85$ , and 0.92 for September 2016, August 2017, and October 2018, respectively), albeit with lower resolution than the ERA5 reanalysis. CAMS represents water vapor somewhat more realistically than it does CO (campaign-wide  ~~$R^2 = 0.37, 0.80, \text{and } 0.86$~~   $R^2 = 0.74, 0.73, \text{and } 0.54$  for September 2016, August 2017, and October 2018), with CO tending to be underestimated relative to observations especially under high smoke concentrations. In contrast, CAMS column aerosol optical depth (AOD) shows similar correlations



to those of CO, but is the CAMS AOD values are generally overestimated relative to the field measurements. While NASA's MERRA-2 reanalysis preserves the observed correlation between CO and  $q$ , the smoky airmasses are frequently displaced (too low in altitude) in MERRA-2 relative to the observations, resulting in poorer direct correlations between MERRA-2 and the observations. This is consistent with the results of Pistone et al. (2021), which focused on the September 2016 observations. Nonetheless, inlet-based observations show a consistent relationship between CO and aerosol extinction across all observations, demonstrating the utility of the CO tracer to understanding vertical aerosol distribution across the season.

Following this good agreement between ORACLES and CAMS/ERA5, we next presented a k-means clustering method using seven years of the reanalyses (Aug-Oct 2014-2020) to examine the multi-year seasonal patterns and trends. While the humidity profiles are distinguished by both variations in total humidity and vertical structure, the CO profiles show a more uniform range, being primarily distinguished by maximum concentration in the free troposphere. Spatially and temporally, we see consistent spatial and temporal variations in smoke and humidity distribution (total concentration and vertical structure) and their correlations to one another, reflecting changing conditions through the BB season. Generally, the high-humidity, high-CO profiles dominate in August and September in the northeast of the study region, and high-humidity, medium-CO dominates in October, with consistently lower concentrations in the southwest of the region. There, the atmosphere is largely unaffected by the smoke transported in the AEJ-S in August, although by October the entire region considered ( $6^{\circ}\text{W}$ - $12^{\circ}\text{E}$ ,  $5^{\circ}\text{S}$ - $21^{\circ}\text{S}$ ) is influenced by smoke and humidity to some degree. The distributions of the co-varied  $q/\text{CO}$  profiles range from being fairly strongly dominated by one type (30-40% for a given CO/ $q$  combination) to more evenly distributed between many profile types ( $\sim 5$ – $10\%$  per type) in different places and times, highlighting the variation in episodic transport over this region.

With this work, we have established a framework which allows us to more completely understand the spatial and temporal variations over the SEA, not just in atmospheric structure of water vapor and chemical species, but also ultimately of the radiative effects of the elevated water vapor signal working in concert with the absorbing aerosol biomass burning plume. By establishing the consistently good agreement between the ERA5 and CAMS reanalyses and the aircraft observations, we can use the reanalyses to describe the frequency of conditions over the SEA. The six k-means profiles each for CO and  $q$  allow for a comprehensive range of conditions to be described, while still limiting the total number of permutations to a manageable number. Previous studies have demonstrated the importance of water vapor and BB heating in this region, and in further work will use this framework to comprehensively assess the impacts of the vertical and spatial structural variance of this region. The range in profile types, even as the general high-smoke/high- $q$ , high-humidity pattern remains, will allow us to quantify the radiative effects of atmospheric humidity and aerosol in this region, both together and as separate components. These results have potential impacts on our understanding of general circulation in the region, large-scale subsidence, precipitation distribution and mixing of BB into the cloud-topped boundary layer. Overall, this will allow for a more complete and nuanced assessment of the aerosol-radiation-climate interactions in this region.

*Code and data availability.* The flight data used in this paper are publicly available at [http://dx.doi.org/10.5067/Suborbital/ORACLES/P3/2016\\_V1](http://dx.doi.org/10.5067/Suborbital/ORACLES/P3/2016_V1), [http://dx.doi.org/10.5067/Suborbital/ORACLES/P3/2017\\_V1](http://dx.doi.org/10.5067/Suborbital/ORACLES/P3/2017_V1), and [http://dx.doi.org/10.5067/Suborbital/ORACLES/P3/2018\\_V1](http://dx.doi.org/10.5067/Suborbital/ORACLES/P3/2018_V1)

for the 2016, 2017, and 2018 data, respectively. The codes used in processing 4STAR data may be found at <https://doi.org/10.5281/zenodo.1492912>. ECMWF reanalyses are available at the Copernicus Climate Data Store (<https://cds.climate.copernicus.eu/>) or the Atmospheric Data Store (<https://ads.atmosphere.copernicus.eu/cdsapp#!/dataset/cams-global-reanalysis-eac4> for ERA5 and CAMS, respectively, subset and ordered according to the parameters described in the text. The MERRA-2 products used are available online at <https://portal.nccs.nasa.gov/datashare/iesacampaigns/ORACLES/>.

- 5 *Author contributions.* KP designed research, performed ORACLES/reanalysis comparisons, and produced the figures. EMW processed ERA5/CAMS reanalysis to provide the k-means cluster results, methodology, analysis, and relevant supplementary figures. COMA data were collected and processed by JP. 4STAR data were collected and processed by SL, KP, and MK. HiGEAR data were collected and processed by SGH and SF. KP wrote the paper, in discussion with EMW and PZ; all other coauthors had the opportunity to provide feedback on the methods, manuscript, and results.
  
- 10 *Competing interests.* The authors declare no competing interests.

*Acknowledgements.* KP, EMW, and MG's time was funded by NASA ACCDAM grant 20-ACCDAM20-0087. The ORACLES mission was funded by NASA Earth Venture Suborbital-2 grant NNH13ZDA001N-EVS2. Like most field work, the ORACLES project was very much a team effort; we thank the ORACLES deployment support teams, the ORACLES science team (for a more complete accounting, see the author list and Table C1 in Redemann et al., 2021), and the governments and people of Walvis Bay and Swakopmund, Namibia, and São

- 15 Tomé, São Tomé e Príncipe for a successful and productive mission. We thank Ju-Mee Ryoo for many helpful conversations and comments, and Stephen Broccardo for comments on earlier drafts of this work.

## References

- Ackerman, A. S., Kirkpatrick, M. P., Stevens, D. E., and Toon, O. B.: The impact of humidity above stratiform clouds on indirect aerosol climate forcing, *Nature*, 432, 1014–1017, <https://doi.org/10.1038/nature03174>, <https://doi.org/10.1038/nature03174>, 2004.
- Adebisi, A. A. and Zuidema, P.: The role of the southern African easterly jet in modifying the southeast Atlantic aerosol and cloud environments, *Quarterly Journal of the Royal Meteorological Society*, 142, 1574–1589, <https://doi.org/10.1002/qj.2765>, 2016.
- 5 Adebisi, A. A., Zuidema, P., and Abel, S. J.: The Convolution of Dynamics and Moisture with the Presence of Shortwave Absorbing Aerosols over the Southeast Atlantic, *Journal of Climate*, 28, 1997–2024, <https://doi.org/10.1175/JCLI-D-14-00352.1>, <https://doi.org/10.1175/JCLI-D-14-00352.1>, 2015.
- Anderson, T. and Ogren, J.: Determining aerosol radiative properties using the TSI 3563 integrating nephelometer, *Aerosol Science and Technology*, 29, 57–69, <https://doi.org/10.1080/02786829808965551>, 1998.
- 10 Anderson, T., Masonis, S., Covert, D., Ahlquist, N., Howell, S., Clarke, A., and McNaughton, C.: Variability of aerosol optical properties derived from in situ aircraft measurements during ACE-Asia, *Journal of Geophysical Research-Atmospheres*, 108, <https://doi.org/10.1029/2002JD003247>, 2003.
- Baró Pérez, A., Diamond, M. S., Bender, F. A.-M., Devasthale, A., Schwarz, M., Savre, J., Tonttila, J., Kokkola, H., Lee, H., Painemal, D., and Ekman, A. M. L.: Comparing the simulated influence of biomass burning plumes on low-level clouds over the southeastern Atlantic under varying smoke conditions, *EGUsphere*, 2023, 1–28, <https://doi.org/10.5194/egusphere-2023-2070>, <https://egusphere.copernicus.org/preprints/2023/egusphere-2023-2070/>, 2023.
- 15 Buchard, V., Randles, C. A., da Silva, A. M., Darmenov, A., Colarco, P. R., Govindaraju, R., Ferrare, R., Hair, J., Beyersdorf, A. J., Ziemba, L. D., and Yu, H.: The MERRA-2 Aerosol Reanalysis, 1980 Onward. Part II: Evaluation and Case Studies, *Journal of Climate*, 30, 6851–6872, <https://doi.org/10.1175/JCLI-D-16-0613.1>, <https://doi.org/10.1175/JCLI-D-16-0613.1>, 2017.
- 20 Chang, I., Gao, L., Burton, S. P., Chen, H., Diamond, M. S., Ferrare, R. A., Flynn, C. J., Kacenelenbogen, M., LeBlanc, S. E., Meyer, K. G., Pistone, K., Schmidt, S., Segal-Rozenhaimer, M., Shinozuka, Y., Wood, R., Zuidema, P., Redemann, J., and Christopher, S. A.: Spatiotemporal Heterogeneity of Aerosol and Cloud Properties Over the Southeast Atlantic: An Observational Analysis, *Geophysical Research Letters*, 48, e2020GL091469, <https://doi.org/https://doi.org/10.1029/2020GL091469>, <https://agupubs.onlinelibrary.wiley.com/doi/abs/10.1029/2020GL091469>, e2020GL091469 2020GL091469, 2021.
- 25 Che, H., Segal-Rozenhaimer, M., Zhang, L., Dang, C., Zuidema, P., Sedlacek III, A. J., Zhang, X., and Flynn, C.: Seasonal variations in fire conditions are important drivers in the trend of aerosol optical properties over the south-eastern Atlantic, *Atmospheric Chemistry and Physics*, 22, 8767–8785, <https://doi.org/10.5194/acp-22-8767-2022>, <https://acp.copernicus.org/articles/22/8767/2022/>, 2022.
- Cochrane, S. P., Schmidt, K. S., Chen, H., Pilewskie, P., Kittelman, S., Redemann, J., LeBlanc, S., Pistone, K., Segal Rozenhaimer, M., Kacenelenbogen, M., Shinozuka, Y., Flynn, C., Ferrare, R., Burton, S., Hostetler, C., Mallet, M., and Zuidema, P.: Biomass burning aerosol heating rates from the ORACLES (ObseRvations of Aerosols above CLouds and their intEractionS) 2016 and 2017 experiments, *Atmospheric Measurement Techniques*, 15, 61–77, <https://doi.org/10.5194/amt-15-61-2022>, <https://amt.copernicus.org/articles/15/61/2022/>, 2022.
- 30 Collow, A., Lucchesi, R., and Da Silva, A.: File Specification for GEOS Products Sampled Along Aircraft Trajectories, Tech. Rep. Office Note No. 18 (Version 1.0), GMAO, [http://gmao.gsfc.nasa.gov/pubs/office\\_notes](http://gmao.gsfc.nasa.gov/pubs/office_notes), 2020.

- 35 Das, S., Harshvardhan, H., Bian, H., Chin, M., Curci, G., Protonotariou, A. P., Mielonen, T., Zhang, K., Wang, H., and Liu, X.: Biomass burning aerosol transport and vertical distribution over the South African-Atlantic region, *Journal of Geophysical Research: Atmospheres*, 122, 6391–6415, <https://doi.org/10.1002/2016JD026421>, <https://agupubs.onlinelibrary.wiley.com/doi/abs/10.1002/2016JD026421>, 2017.
- Deaconu, L. T., Ferlay, N., Waquet, F., Peers, F., Thieuleux, F., and Goloub, P.: Satellite inference of water vapour and above-cloud aerosol combined effect on radiative budget and cloud-top processes in the southeastern Atlantic Ocean, *Atmospheric Chemistry and Physics*, 19, 11 613–11 634, <https://doi.org/10.5194/acp-19-11613-2019>, <https://www.atmos-chem-phys.net/19/11613/2019/>, 2019.
- 5 Doherty, S. J., Saide, P. E., Zuidema, P., Shinozuka, Y., Ferrada, G. A., Gordon, H., Mallet, M., Meyer, K., Painemal, D., Howell, S. G., Freitag, S., Dobracki, A., Podolske, J. R., Burton, S. P., Ferrare, R. A., Howes, C., Nabat, P., Carmichael, G. R., da Silva, A., Pistone, K., Chang, I., Gao, L., Wood, R., and Redemann, J.: Modeled and observed properties related to the direct aerosol radiative effect of biomass burning aerosol over the southeastern Atlantic, *Atmospheric Chemistry and Physics*, 22, 1–46, <https://doi.org/10.5194/acp-22-1-2022>, <https://acp.copernicus.org/articles/22/1/2022/>, 2022.
- 10 Dunagan, S. E., Johnson, R., Zavaleta, J., Russell, P. B., Schmid, B., Flynn, C., Redemann, J., Shinozuka, Y., Livingston, J., and Segal-Rosenhaimer, M.: Spectrometer for Sky-Scanning Sun-Tracking Atmospheric Research (4STAR): Instrument Technology, *Remote Sensing*, 5, 3872–3895, <https://doi.org/10.3390/rs5083872>, 2013.
- Eck, T. F., Holben, B. N., Reid, J. S., Mukelabai, M. M., Piketh, S. J., Torres, O., Jethva, H. T., Hyer, E. J., Ward, D. E., Dubovik, O., Sinyuk, 15 A., Schafer, J. S., Giles, D. M., Sorokin, M., Smirnov, A., and Slutsker, I.: A seasonal trend of single scattering albedo in southern African biomass-burning particles: Implications for satellite products and estimates of emissions for the world’s largest biomass-burning source, *Journal of Geophysical Research-Atmospheres*, 118, 6414–6432, <https://doi.org/10.1002/jgrd.50500>, 2013.
- Forster, P., Storelvmo, T., Armour, K., Collins, W., Dufresne, J.-L., Frame, D., Lunt, D., Mauritsen, T., Palmer, M., Watanabe, M., Wild, 20 M., and Zhang, H.: The Earth’s Energy Budget, Climate Feedbacks, and Climate Sensitivity, book section 7, p. 923–1054, Cambridge University Press, Cambridge, United Kingdom and New York, NY, USA, <https://doi.org/10.1017/9781009157896.009>, 2021.
- Gelaro, R., McCarty, W., Suárez, M. J., Todling, R., Molod, A., Takacs, L., Randles, C. A., Darmenov, A., Bosilovich, M. G., Reichle, R., Wargan, K., Coy, L., Cullather, R., Draper, C., Akella, S., Buchard, V., Conaty, A., da Silva, A. M., Gu, W., Kim, G.-K., Koster, R., Lucchesi, R., Merkova, D., Nielsen, J. E., Partyka, G., Pawson, S., Putman, W., Rienecker, M., Schubert, S. D., Sienkiewicz, M., and Zhao, 25 B.: The Modern-Era Retrospective Analysis for Research and Applications, Version 2 (MERRA-2), *Journal of Climate*, 30, 5419–5454, <https://doi.org/10.1175/JCLI-D-16-0758.1>, <https://doi.org/10.1175/JCLI-D-16-0758.1>, 2017.
- Haywood, J., Francis, P., Dubovik, O., Glew, M., and Holben, B.: Comparison of aerosol size distributions, radiative properties, and optical depths determined by aircraft observations and Sun photometers during SAFARI 2000, *Journal of Geophysical Research-Atmospheres*, 108, <https://doi.org/10.1029/2002JD002250>, 2003.
- Hersbach, H., Bell, W., Berrisford, P., Horányi, A., J., M.-S., Nicolas, J., Radu, R., Schepers, D., Simmons, A., Soci, C., and Dee, D.: 30 Global reanalysis: goodbye ERA-Interim, hello ERA5, *ECMWF Newsletter*, pp. 17–24, <https://doi.org/10.21957/vf291hehd7>, <https://www.ecmwf.int/node/19027>, 2019.
- Hersbach, H., Bell, B., Berrisford, P., Hirahara, S., Horányi, A., Muñoz-Sabater, J., Nicolas, J., Peubey, C., Radu, R., Schepers, D., Simmons, A., Soci, C., Abdalla, S., Abellan, X., Balsamo, G., Bechtold, P., Biavati, G., Bidlot, J., Bonavita, M., De Chiara, G., Dahlgren, P., Dee, D., Diamantakis, M., Dragani, R., Flemming, J., Forbes, R., Fuentes, M., Geer, A., Haimberger, L., Healy, S., Hogan, R. J., 35 Hólm, E., Janisková, M., Keeley, S., Laloyaux, P., Lopez, P., Lupu, C., Radnoti, G., de Rosnay, P., Rozum, I., Vamborg, F., Villaume, S., and Thépaut, J.-N.: The ERA5 global reanalysis, *Quarterly Journal of the Royal Meteorological Society*, 146, 1999–2049, <https://doi.org/https://doi.org/10.1002/qj.3803>, <https://rmets.onlinelibrary.wiley.com/doi/abs/10.1002/qj.3803>, 2020.

- Inness, A., Ades, M., Agustí-Panareda, A., Barré, J., Benedictow, A., Blechschmidt, A.-M., Dominguez, J. J., Engelen, R., Eskes, H., Flemming, J., Huijnen, V., Jones, L., Kipling, Z., Massart, S., Parrington, M., Peuch, V.-H., Razinger, M., Remy, S., Schulz, M., and Suttie, M.: The CAMS reanalysis of atmospheric composition, *Atmospheric Chemistry and Physics*, 19, 3515–3556, <https://doi.org/10.5194/acp-19-3515-2019>, <https://acp.copernicus.org/articles/19/3515/2019/>, 2019.
- Inness, A., Aben, I., Ades, M., Borsdorff, T., Flemming, J., Jones, L., Landgraf, J., Langerock, B., Nedelec, P., Parrington, M., and Ribas, R.: Assimilation of S5P/TROPOMI carbon monoxide data with the global CAMS near-real-time system, *Atmospheric Chemistry and Physics*, 22, 14 355–14 376, <https://doi.org/10.5194/acp-22-14355-2022>, <https://acp.copernicus.org/articles/22/14355/2022/>, 2022.
- Johnson, B. T. and Haywood, J. M.: Assessing the Impact of Self-Lofting on Increasing the Altitude of Black Carbon in a Global Climate Model, *Journal of Geophysical Research: Atmospheres*, 128, e2022JD038 039, <https://doi.org/https://doi.org/10.1029/2022JD038039>, <https://agupubs.onlinelibrary.wiley.com/doi/abs/10.1029/2022JD038039>, e2022JD038039 2022JD038039, 2023.
- Koch, D. and Del Genio, A. D.: Black carbon semi-direct effects on cloud cover: review and synthesis, *Atmospheric Chemistry and Physics*, 10, 7685–7696, <https://doi.org/10.5194/acp-10-7685-2010>, 2010.
- LeBlanc, S. E., Redemann, J., Flynn, C., Pistone, K., Kacenelenbogen, M., Segal-Rosenheimer, M., Shinozuka, Y., Dunagan, S., Dahlgren, R. P., Meyer, K., Podolske, J., Howell, S. G., Freitag, S., Small-Griswold, J., Holben, B., Diamond, M., Wood, R., Formenti, P., Piketh, S., Mags-Kölling, G., Gerber, M., and Namwoonde, A.: Above-cloud aerosol optical depth from airborne observations in the south-east Atlantic, *Atmospheric Chemistry and Physics*, 20, 1565–1590, <https://doi.org/10.5194/acp-20-1565-2020>, <https://acp.copernicus.org/articles/20/1565/2020/>, 2020.
- Liu, X., Huey, L. G., Yokelson, R. J., Selimovic, V., Simpson, I. J., Müller, M., Jimenez, J. L., Campuzano-Jost, P., Beyersdorf, A. J., Blake, D. R., Butterfield, Z., Choi, Y., Crouse, J. D., Day, D. A., Diskin, G. S., Dubey, M. K., Fortner, E., Hanisco, T. F., Hu, W., King, L. E., Kleinman, L., Meinardi, S., Mikoviny, T., Onasch, T. B., Palm, B. B., Peischl, J., Pollack, I. B., Ryerson, T. B., Sachse, G. W., Sedlacek, A. J., Shilling, J. E., Springston, S., St. Clair, J. M., Tanner, D. J., Teng, A. P., Wennberg, P. O., Wisthaler, A., and Wolfe, G. M.: Airborne measurements of western U.S. wildfire emissions: Comparison with prescribed burning and air quality implications, *Journal of Geophysical Research: Atmospheres*, 122, 6108–6129, <https://doi.org/https://doi.org/10.1002/2016JD026315>, <https://agupubs.onlinelibrary.wiley.com/doi/abs/10.1002/2016JD026315>, 2017.
- Magi, B. and Hobbs, P.: Effects of humidity on aerosols in southern Africa during the biomass burning season, *Journal of Geophysical Research-Atmospheres*, 108, <https://doi.org/10.1029/2002JD002144>, 2003.
- McNaughton, C. S., Clarke, A. D., Freitag, S., Kapustin, V. N., Kondo, Y., Moteki, N., Sahu, L., Takegawa, N., Schwarz, J. P., Spackman, J. R., Watts, L., Diskin, G., Podolske, J., Holloway, J. S., Wisthaler, A., Mikoviny, T., de Gouw, J., Warneke, C., Jimenez, J., Cubison, M., Howell, S. G., Middlebrook, A., Bahreini, R., Anderson, B. E., Winstead, E., Thornhill, K. L., Lack, D., Cozic, J., and Brock, C. A.: Absorbing aerosol in the troposphere of the Western Arctic during the 2008 ARCTAS/ARCPAC airborne field campaigns, *Atmospheric Chemistry and Physics*, 11, 7561–7582, <https://doi.org/10.5194/acp-11-7561-2011>, 2011.
- Morcrette, J.-J., Boucher, O., Jones, L., Salmond, D., Bechtold, P., Beljaars, A., Benedetti, A., Bonet, A., Kaiser, J. W., Razinger, M., Schulz, M., Serrar, S., Simmons, A. J., Sofiev, M., Suttie, M., Tompkins, A. M., and Untch, A.: Aerosol analysis and forecast in the European Centre for Medium-Range Weather Forecasts Integrated Forecast System: Forward modeling, *Journal of Geophysical Research: Atmospheres*, 114, <https://doi.org/https://doi.org/10.1029/2008JD011235>, <https://agupubs.onlinelibrary.wiley.com/doi/abs/10.1029/2008JD011235>, 2009.
- Pistone, K., Redemann, J., Doherty, S., Zuidema, P., Burton, S., Cairns, B., Cochrane, S., Ferrare, R., Flynn, C., Freitag, S., Howell, S. G., Kacenelenbogen, M., LeBlanc, S., Liu, X., Schmidt, K. S., Sedlacek III, A. J., Segal-Rozenhaimer, M., Shinozuka, Y., Stamnes, S.,

- van Diedenhoven, B., Van Harten, G., and Xu, F.: Intercomparison of biomass burning aerosol optical properties from in situ and remote-sensing instruments in ORACLES-2016, *Atmospheric Chemistry and Physics*, 19, 9181–9208, <https://doi.org/10.5194/acp-19-9181-2019>, <https://www.atmos-chem-phys.net/19/9181/2019/>, 2019.
- Pistone, K., Zuidema, P., Wood, R., Diamond, M., da Silva, A. M., Ferrada, G., Saide, P. E., Ueyama, R., Ryoo, J.-M., Pfister, L., Podolske, J., Noone, D., Bennett, R., Stith, E., Carmichael, G., Redemann, J., Flynn, C., LeBlanc, S., Segal-Rozenhaimer, M., and Shinozuka, Y.:  
5 Exploring the elevated water vapor signal associated with the free tropospheric biomass burning plume over the southeast Atlantic Ocean, *Atmospheric Chemistry and Physics*, 21, 9643–9668, <https://doi.org/10.5194/acp-21-9643-2021>, <https://acp.copernicus.org/articles/21/9643/2021/>, 2021.
- Provencal, R., Gupta, M., Owano, T. G., Baer, D. S., Ricci, K. N., O’Keefe, A., and Podolske, J. R.: Cavity-enhanced quantum-cascade laser-based instrument for carbon monoxide measurements, *Appl. Opt.*, 44, 6712–6717, <https://doi.org/10.1364/AO.44.006712>, <http://ao.osa.org/abstract.cfm?URI=ao-44-31-6712>, 2005.  
10
- Randles, C. A., da Silva, A. M., Buchard, V., Colarco, P. R., Darmenov, A., Govindaraju, R., Smirnov, A., Holben, B., Ferrare, R., Hair, J., Shinozuka, Y., and Flynn, C. J.: The MERRA-2 Aerosol Reanalysis, 1980 Onward. Part I: System Description and Data Assimilation Evaluation, *Journal of Climate*, 30, 6823–6850, <https://doi.org/10.1175/JCLI-D-16-0609.1>, <https://doi.org/10.1175/JCLI-D-16-0609.1>, 2017.
- 15 Redemann, J., Wood, R., Zuidema, P., Doherty, S. J., Luna, B., LeBlanc, S. E., Diamond, M. S., Shinozuka, Y., Chang, I. Y., Ueyama, R., Pfister, L., Ryoo, J.-M., Dobracki, A. N., da Silva, A. M., Longo, K. M., Kacenenbogen, M. S., Flynn, C. J., Pistone, K., Knox, N. M., Piketh, S. J., Haywood, J. M., Formenti, P., Mallet, M., Stier, P., Ackerman, A. S., Bauer, S. E., Fridlind, A. M., Carmichael, G. R., Saide, P. E., Ferrada, G. A., Howell, S. G., Freitag, S., Cairns, B., Holben, B. N., Knobelspiesse, K. D., Tanelli, S., L’Ecuyer, T. S., Dzambo, A. M., Sy, O. O., McFarquhar, G. M., Poellot, M. R., Gupta, S., O’Brien, J. R., Nenes, A., Kacarab, M., Wong, J. P. S., Small-Griswold, J. D., Thornhill, K. L., Noone, D., Podolske, J. R., Schmidt, K. S., Pilewskie, P., Chen, H., Cochrane, S. P., Sedlacek, A. J., Lang, T. J.,  
20 Stith, E., Segal-Rozenhaimer, M., Ferrare, R. A., Burton, S. P., Hostetler, C. A., Diner, D. J., Seidel, F. C., Platnick, S. E., Myers, J. S., Meyer, K. G., Spangenberg, D. A., Maring, H., and Gao, L.: An overview of the ORACLES (ObseRvations of Aerosols above CLouds and their intEractionS) project: aerosol–cloud–radiation interactions in the southeast Atlantic basin, *Atmospheric Chemistry and Physics*, 21, 1507–1563, <https://doi.org/10.5194/acp-21-1507-2021>, <https://acp.copernicus.org/articles/21/1507/2021/>, 2021.
- 25 Ryoo, J.-M., Pfister, L., Ueyama, R., Zuidema, P., Wood, R., Chang, I., and Redemann, J.: A meteorological overview of the ORACLES (ObseRvations of Aerosols above CLouds and their intEractionS) campaign over the southeastern Atlantic during 2016–2018: Part 1 – Climatology, *Atmospheric Chemistry and Physics*, 21, 16 689–16 707, <https://doi.org/10.5194/acp-21-16689-2021>, <https://acp.copernicus.org/articles/21/16689/2021/>, 2021.
- Ryoo, J.-M., Pfister, L., Ueyama, R., Zuidema, P., Wood, R., Chang, I., and Redemann, J.: A meteorological overview of the ORACLES (ObseRvations of Aerosols above CLouds and their intEractionS) campaign over the southeastern Atlantic during 2016–2018: Part 2 –  
30 Daily and synoptic characteristics, *Atmospheric Chemistry and Physics*, 22, 14 209–14 241, <https://doi.org/10.5194/acp-22-14209-2022>, <https://acp.copernicus.org/articles/22/14209/2022/>, 2022.
- Schelbergen, M., Kalverla, P. C., Schmehl, R., and Watson, S. J.: Clustering wind profile shapes to estimate airborne wind energy production, *Wind Energy Science*, 5, 1097–1120, <https://doi.org/10.5194/wes-5-1097-2020>, <https://wes.copernicus.org/articles/5/1097/2020/>, 2020.
- 35 Segal-Rosenheimer, M., Russell, P. B., Schmid, B., Redemann, J., Livingston, J. M., Flynn, C. J., Johnson, R. R., Dunagan, S. E., Shinozuka, Y., Herman, J., Cede, A., Abuhassan, N., Comstock, J. M., Hubbe, J. M., Zelenyuk, A., and Wilson, J.: Tracking elevated pollution layers

- with a newly developed hyperspectral Sun/Sky spectrometer (4STAR): Results from the TCAP 2012 and 2013 campaigns, *Journal of Geophysical Research-Atmospheres*, 119, 2611–2628, <https://doi.org/10.1002/2013JD020884>, 2014.
- Shinozuka, Y., Saide, P. E., Ferrada, G. A., Burton, S. P., Ferrare, R., Doherty, S. J., Gordon, H., Longo, K., Mallet, M., Feng, Y., Wang, Q., Cheng, Y., Dobracki, A., Freitag, S., Howell, S. G., LeBlanc, S., Flynn, C., Segal-Rosenhaimer, M., Pistone, K., Podolske, J. R., Stith, E. J., Bennett, J. R., Carmichael, G. R., da Silva, A., Govindaraju, R., Leung, R., Zhang, Y., Pfister, L., Ryoo, J.-M., Redemann, J.,  
5 Wood, R., and Zuidema, P.: Modeling the smoky troposphere of the southeast Atlantic: a comparison to ORACLES airborne observations from September of 2016, *Atmospheric Chemistry and Physics*, 20, 11 491–11 526, <https://doi.org/10.5194/acp-20-11491-2020>, <https://acp.copernicus.org/articles/20/11491/2020/>, 2020.
- Shinozuka, Y., Johnson, R. R., Flynn, C. J., Russell, P. B., Schmid, B., Redemann, J., Dunagan, S. E., Kluzek, C. D., Hubbe, J. M., Segal-Rosenheimer, M., Livingston, J. M., Eck, T. F., Wagener, R., Gregory, L., Chand, D., Berg, L. K., Rogers, R. R., Ferrare, R. A., Hair,  
10 J. W., Hostetler, C. A., and Burton, S. P.: Hyperspectral aerosol optical depths from TCAP flights, *Journal of Geophysical Research-Atmospheres*, 118, 12 180–12 194, <https://doi.org/10.1002/2013JD020596>, 2013.
- Szopa, S., Naik, V., Adhikary, B., Artaxo, P., Berntsen, T., Collins, W., Fuzzi, S., Gallardo, L., Kiendler-Scharr, A., Klimont, Z., Liao, H., Unger, N., and Zanis, P.: Short-Lived Climate Forcers, book section 6, p. 817–922, Cambridge University Press, Cambridge, United Kingdom and New York, NY, USA, <https://doi.org/10.1017/9781009157896.008>, 2021.
- 15 Virkkula, A.: Correction of the Calibration of the 3-wavelength Particle Soot Absorption Photometer (3 PSAP), *Aerosol Science and Technology*, 44, 706–712, <https://doi.org/10.1080/02786826.2010.482110>, 2010.
- Wilcox, E. M.: Stratocumulus cloud thickening beneath layers of absorbing smoke aerosol, *Atmospheric Chemistry and Physics*, 10, 11 769–11 777, <https://doi.org/10.5194/acp-10-11769-2010>, 2010.
- Wilcox, E. M., Thomas, R. M., Praveen, P. S., Pistone, K., Bender, F. A.-M., and Ramanathan, V.: Black carbon solar absorption  
20 suppresses turbulence in the atmospheric boundary layer, *Proceedings of the National Academy of Sciences*, 113, 11 794–11 799, <https://doi.org/10.1073/pnas.1525746113>, <https://www.pnas.org/doi/abs/10.1073/pnas.1525746113>, 2016.
- Zuidema, P., Chang, P., Medeiros, B., Kirtman, B. P., Mechoso, R., Schneider, E. K., Toniazzo, T., Richter, I., Small, R. J., Bel-lomo, K., Brandt, P., de Szoeki, S., Farrar, J. T., Jung, E., Kato, S., Li, M., Patricola, C., Wang, Z., Wood, R., and Xu, Z.: Chal-lenges and Prospects for Reducing Coupled Climate Model SST Biases in the Eastern Tropical Atlantic and Pacific Oceans: The  
25 U.S. CLIVAR Eastern Tropical Oceans Synthesis Working Group, *Bulletin of the American Meteorological Society*, 97, 2305 – 2328, <https://doi.org/https://doi.org/10.1175/BAMS-D-15-00274.1>, <https://journals.ametsoc.org/view/journals/bams/97/12/bams-d-15-00274.1.xml>, 2016.

## Supplementary Material

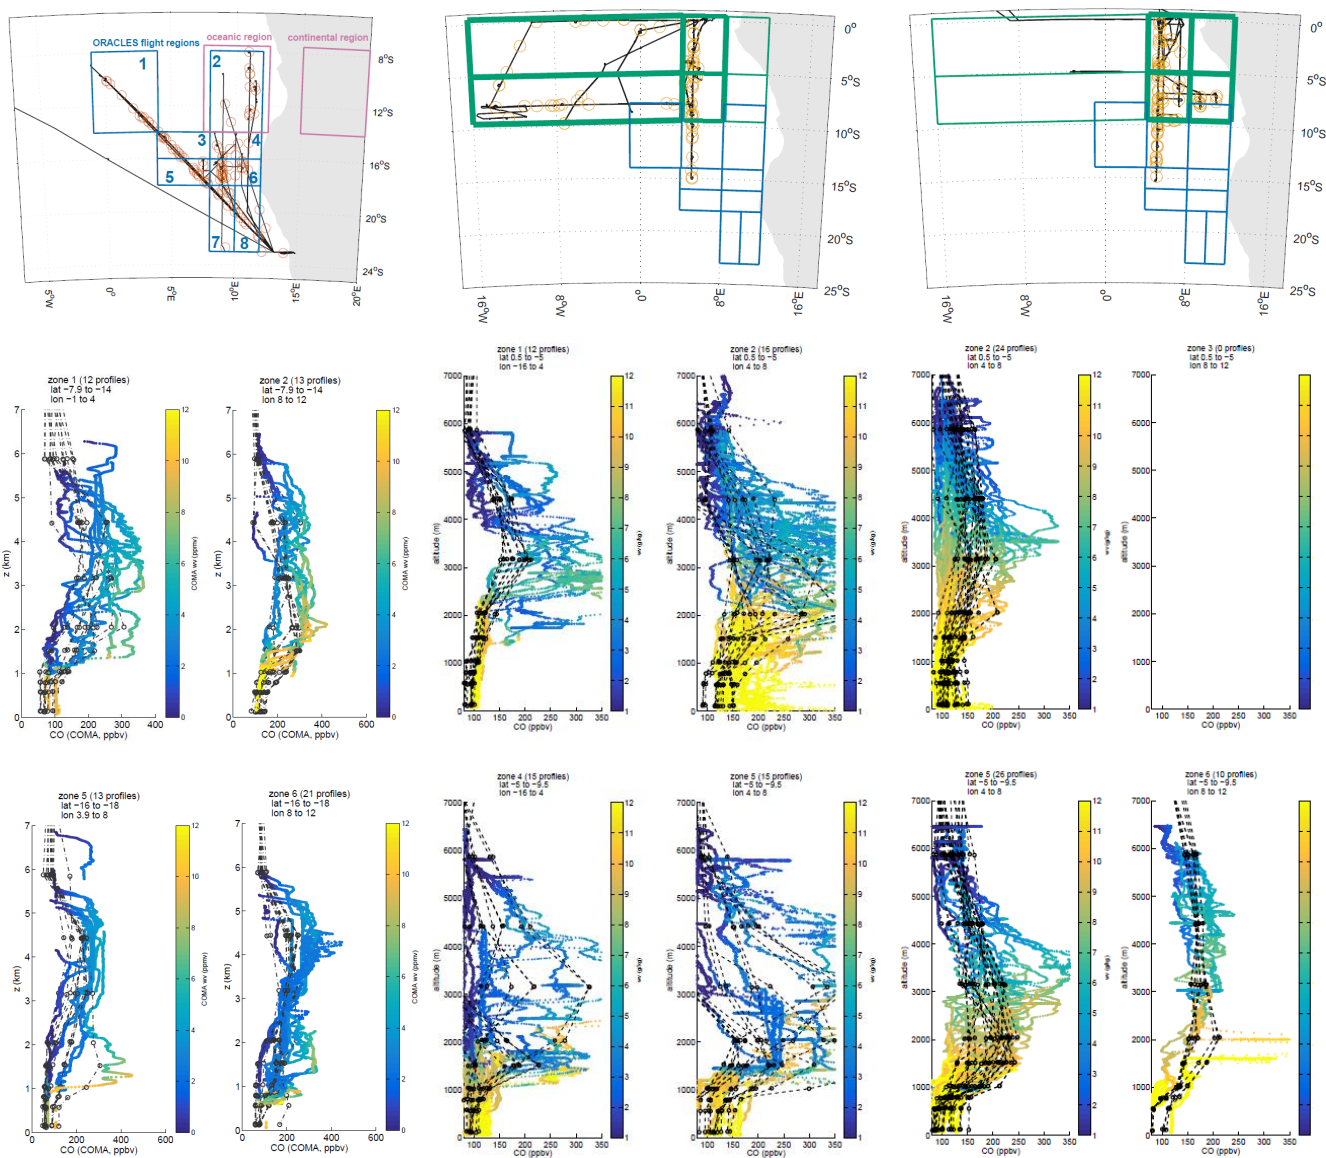

**Figure S1.** Sample subset of spatially subdivided CO profiles for the each ORACLES flight campaign and corresponding CAMS profiles, showing the good agreement of vertical extent and the consistent underestimation in CAMS particularly in the maximum CO values. Spatial subdivisions correspond to Regions 1-2 and 5-6 for 2016 (numbering as used in Pistone et al., 2021), and to the bolded green regions for 2017 and 2018 (also shown in Figure 1). Colors indicate the specific humidity.



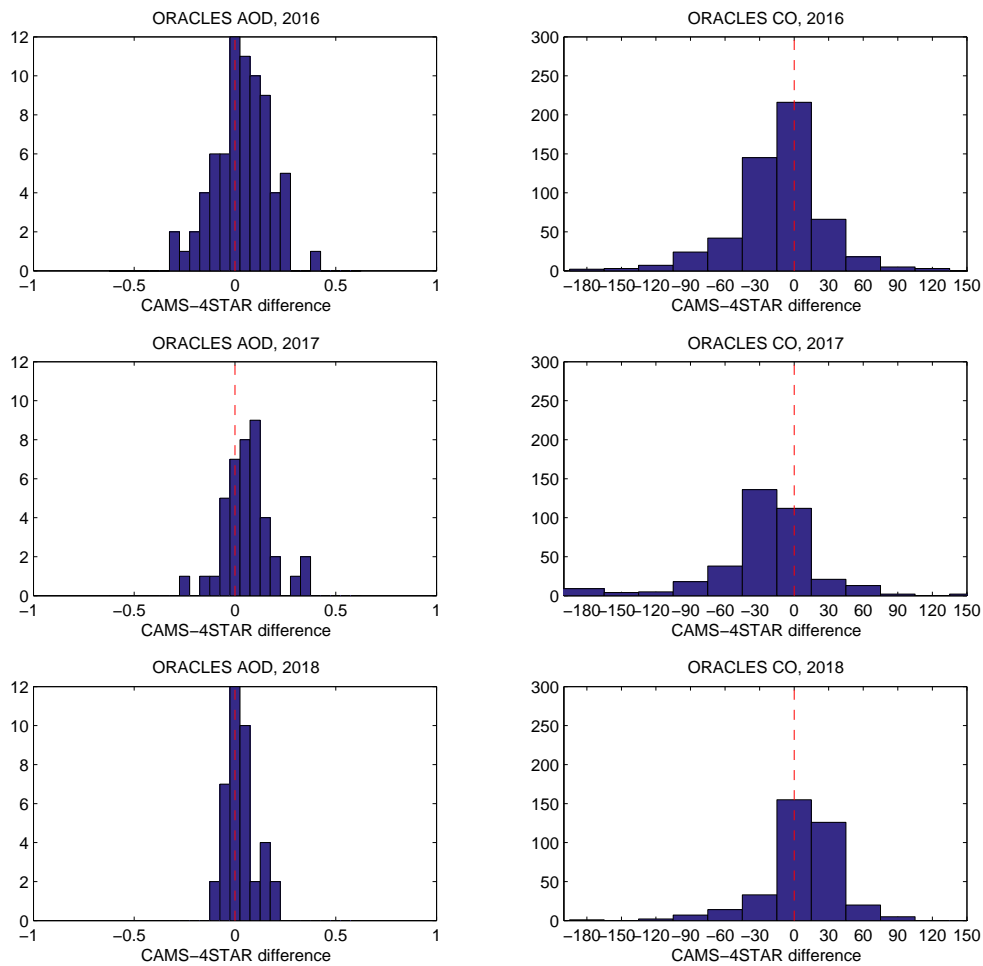

**Figure S2.** Difference between (left) CAMS BB AODs and ORACLES 4STAR-reported AODs and (right) CAMS CO and ORACLES COMA-measured CO for each deployment, taken at the subsets shown in Figure 6. The majority of the AODs are within  $\pm 0.2$  of one another; CAMS tends to overestimate AOD relative to 4STAR. In contrast, CAMS tends to underestimate CO relative to the observations, except in October.

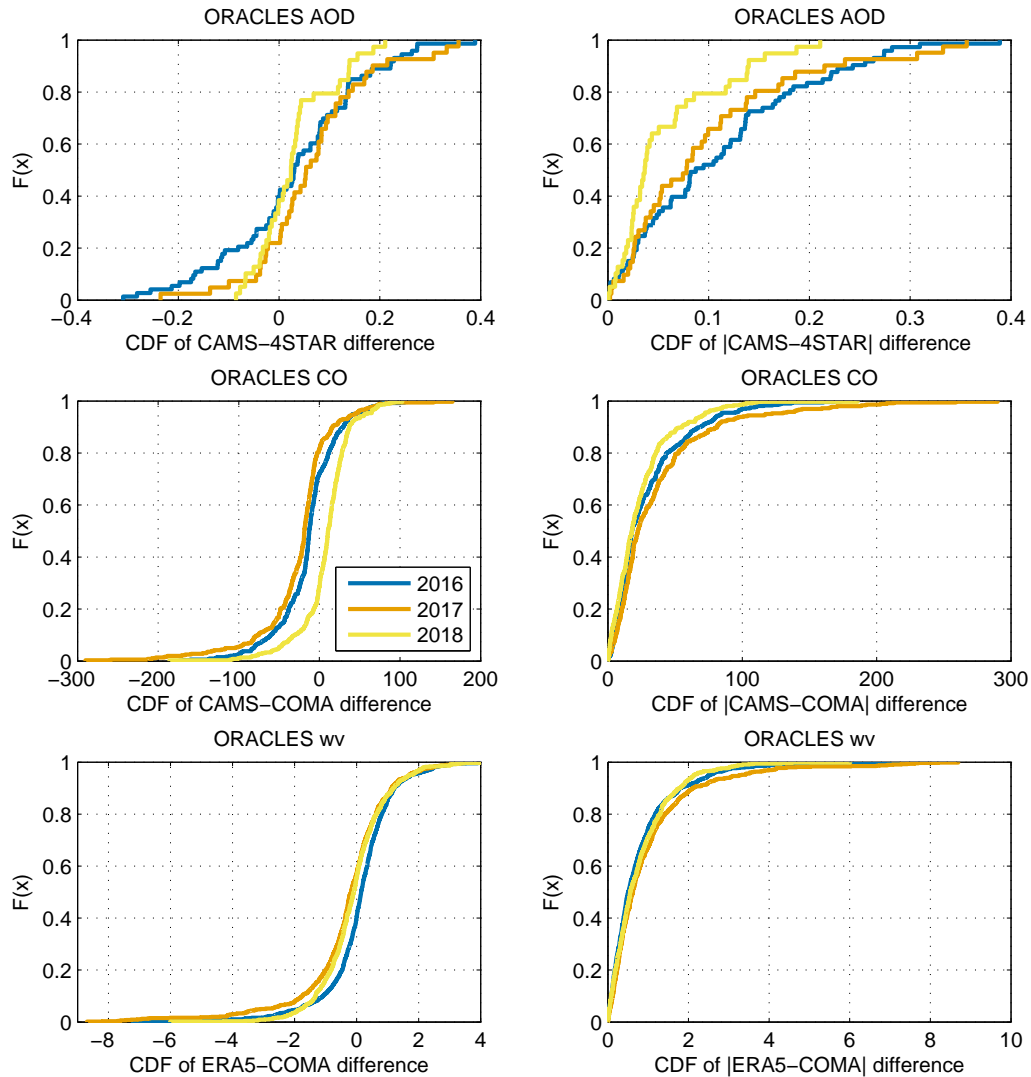

**Figure S3.** Cumulative distribution functions showing the agreement between collocated reanalysis-observation comparison points (differences, left, and in absolute values, right), for each deployment year. The right side shows the good absolute agreement between reanalysis and observations, especially for the vertically resolved values (i.e., CO and water vapor), and the left side shows the tendencies of these distributions towards over- vs underestimations (e.g. slight overestimation in AOD in CAMS, and slight underestimation in CO, with the exception of 2018.)

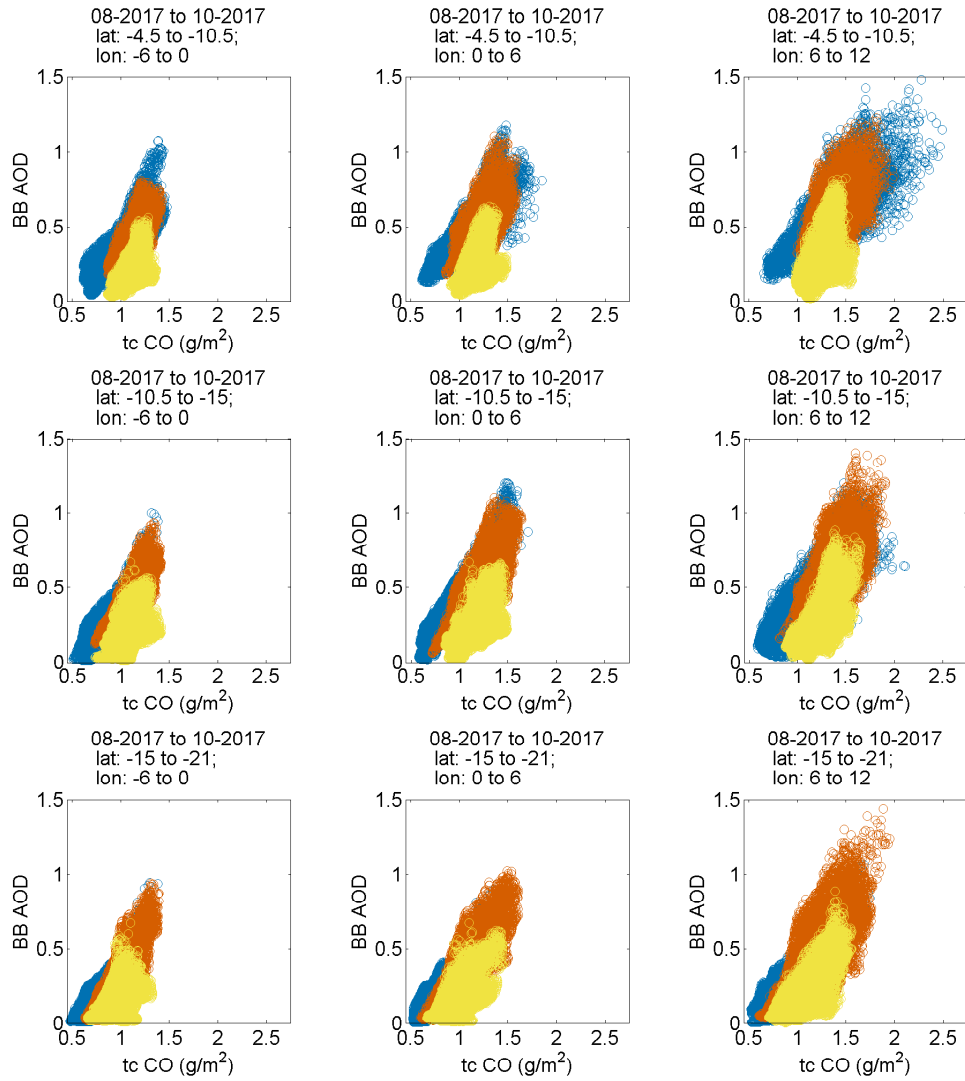

**Figure S4.** Gridded CAMS column total column carbon monoxide versus column biomass burning AOD (organics + BC) for 2017. August (blue) has a less steep slope than October (yellow) with September (orange) intermediate, showing the seasonal evolution of column values.

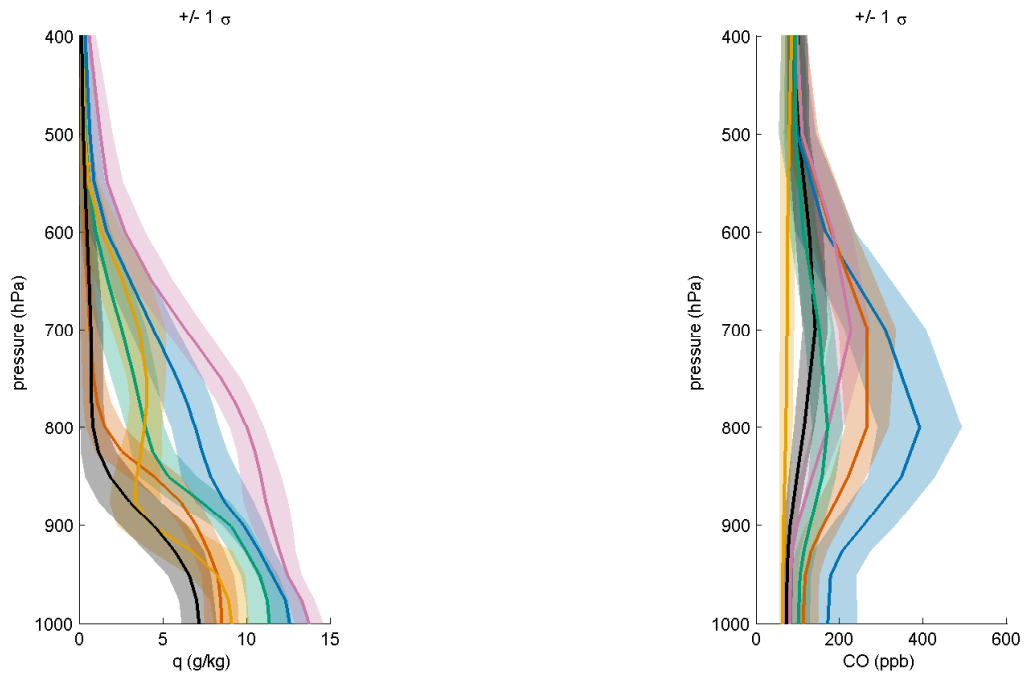

**Figure S5.** K-means classifications for  $q$  and CO, showing the range (standard deviation) of the ERA5 and CAMS (respectively) profiles classified as that profile type.

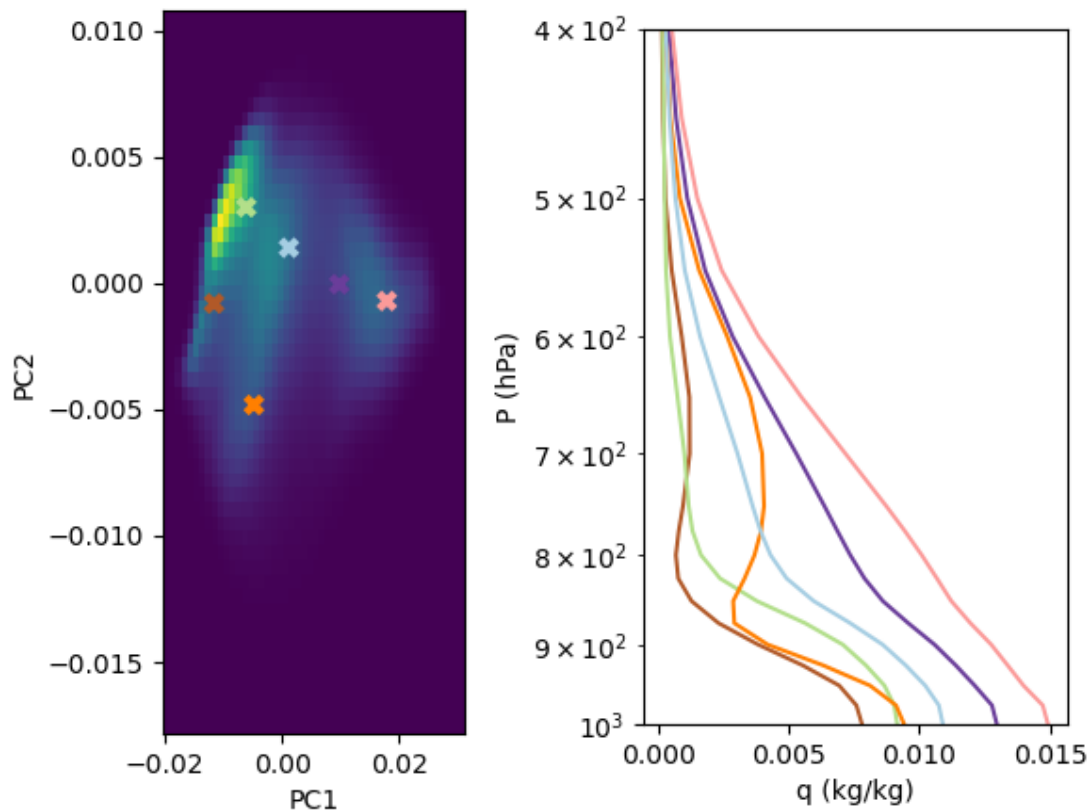

**Figure S6.** Principal component analysis (left panel) showing the relative abundance of water vapor profiles in ERA5 in the phase space of the first and second principal components (PC1 and PC2, respectively) of all ERA5 water vapor profiles over the region. 'X' symbols indicate the centroid locations in the phase space of the principal components of a k-means clustering used to identify analysis on abundance of water vapor profiles in the canonical phase space. Right panel shows the resulting water vapor profiles associated with each of the 6 clusters produced from the k-means clustering analysis, which serve as the canonical set of water vapor profiles over the region shown in Figure 7.

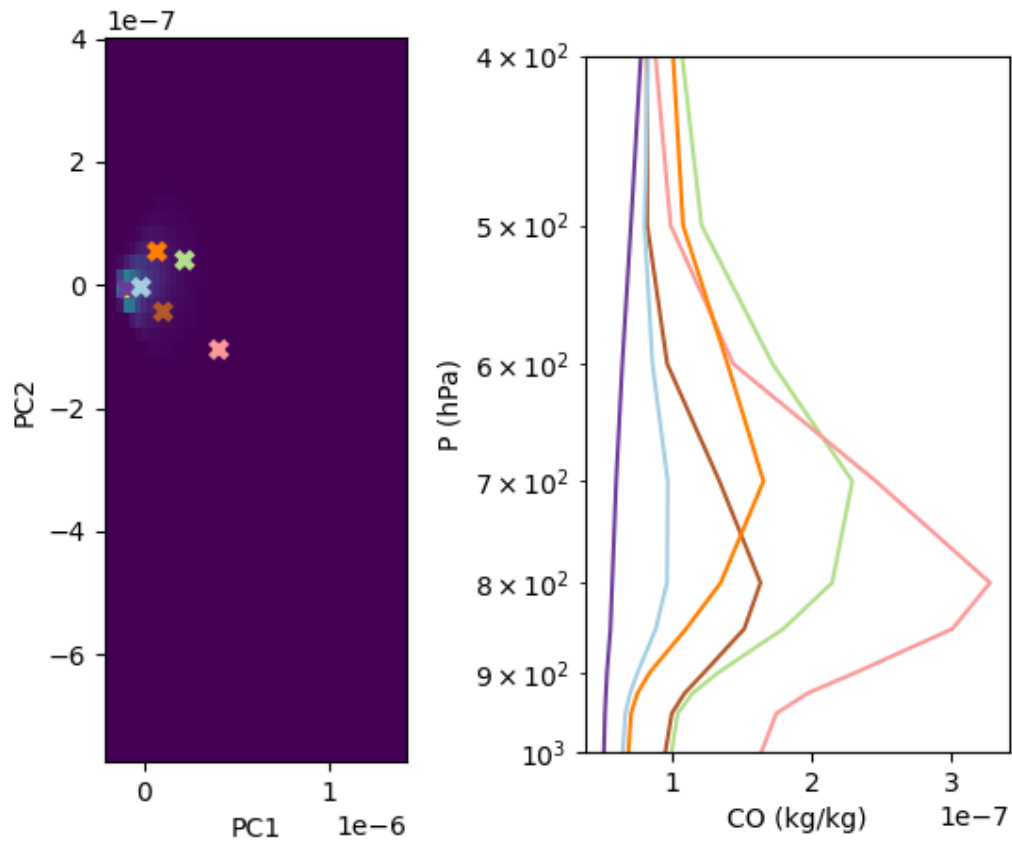

**Figure S7.** ~~k-means clustering used to identify~~ Same as Figure S6 but for profiles of CO from the ~~eanonical carbon monoxide~~ CAMS simulations. Right panel shows the resulting CO profiles that serve as the canonical set of CO profiles shown in Figure 8.

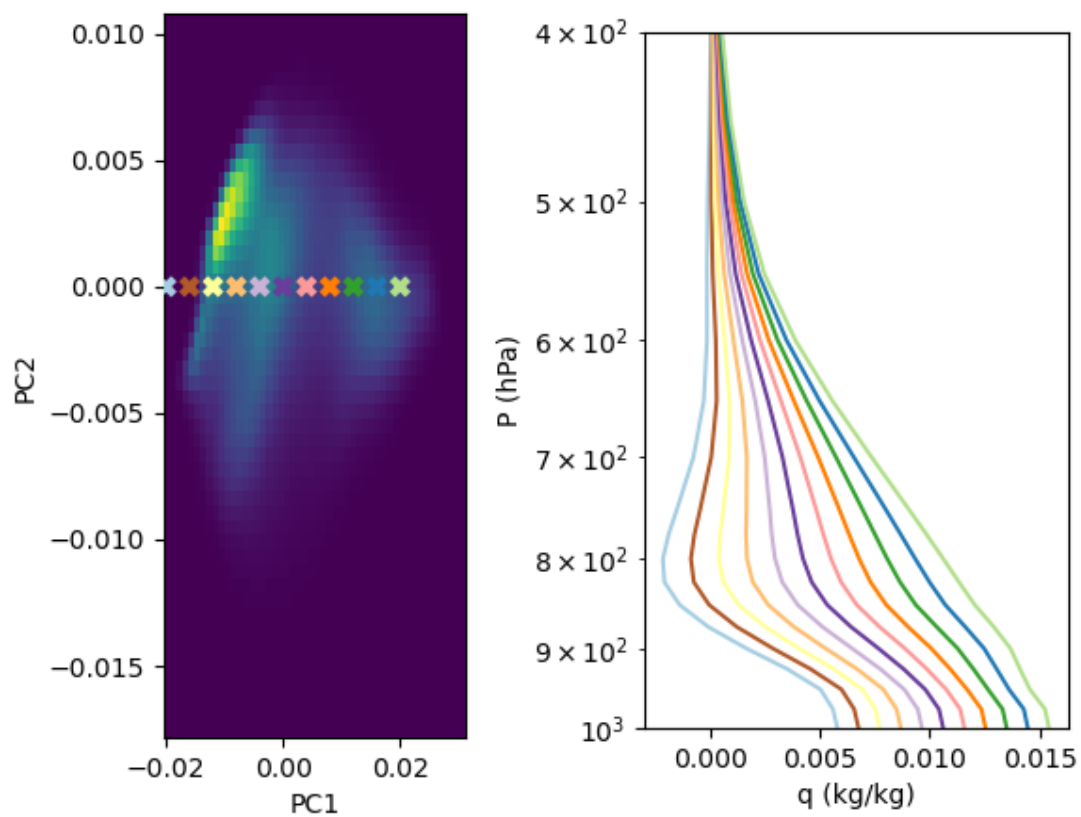

**Figure S8. Example cross-section** Left panel shading is the same as left panel in Figure S6. 'X' symbols show samples selected from across the range of values of the first principal component for a constant value of the second principal component. Right panel shows the resulting water vapor profile corresponding to each 'X' symbol and illustrates the variability of the first principal component of the water vapor profiles across PC1, which is largely showing the variation in total the magnitude of the column water vapor concentration.

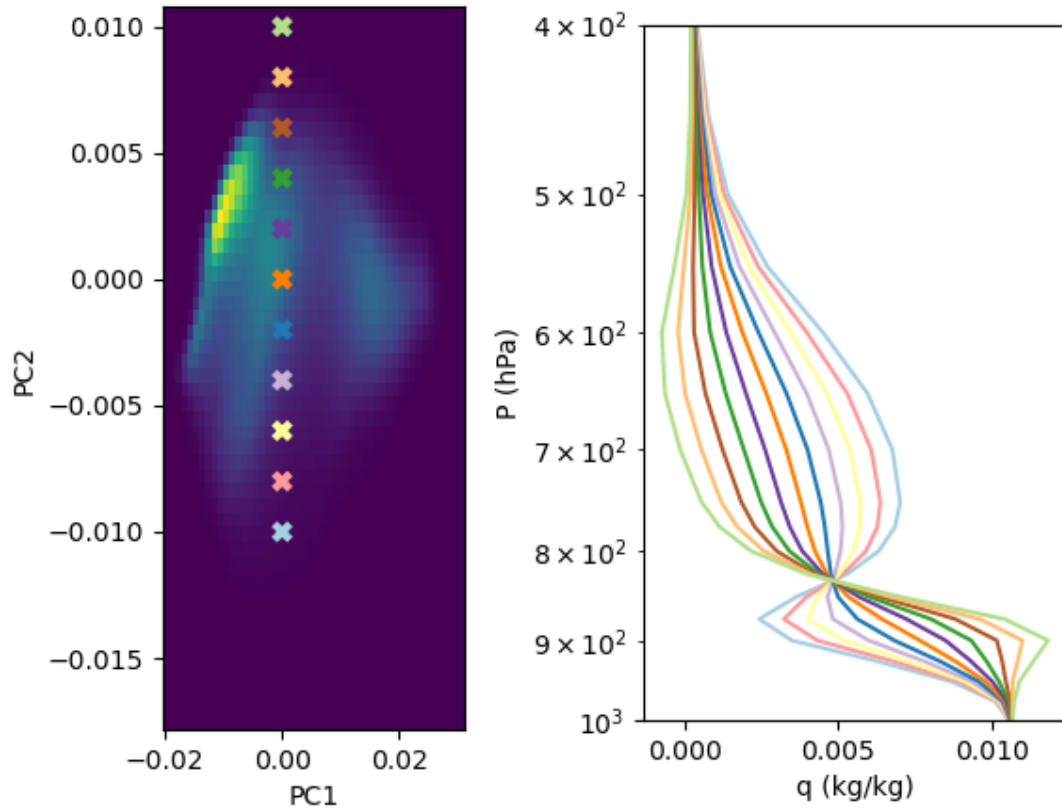

**Figure S9.** ~~Example cross-section~~ As in Figure S8 but the right panel illustrates the variability of the second principal component of the water vapor profiles ~~across PC2~~(right panel), ~~showing how~~ which is capturing the variations in upper-level q between the 500 and 800 hPa pressure levels relative to the lower-level q ~~varies along this component~~ below the 850 hPa pressure level.



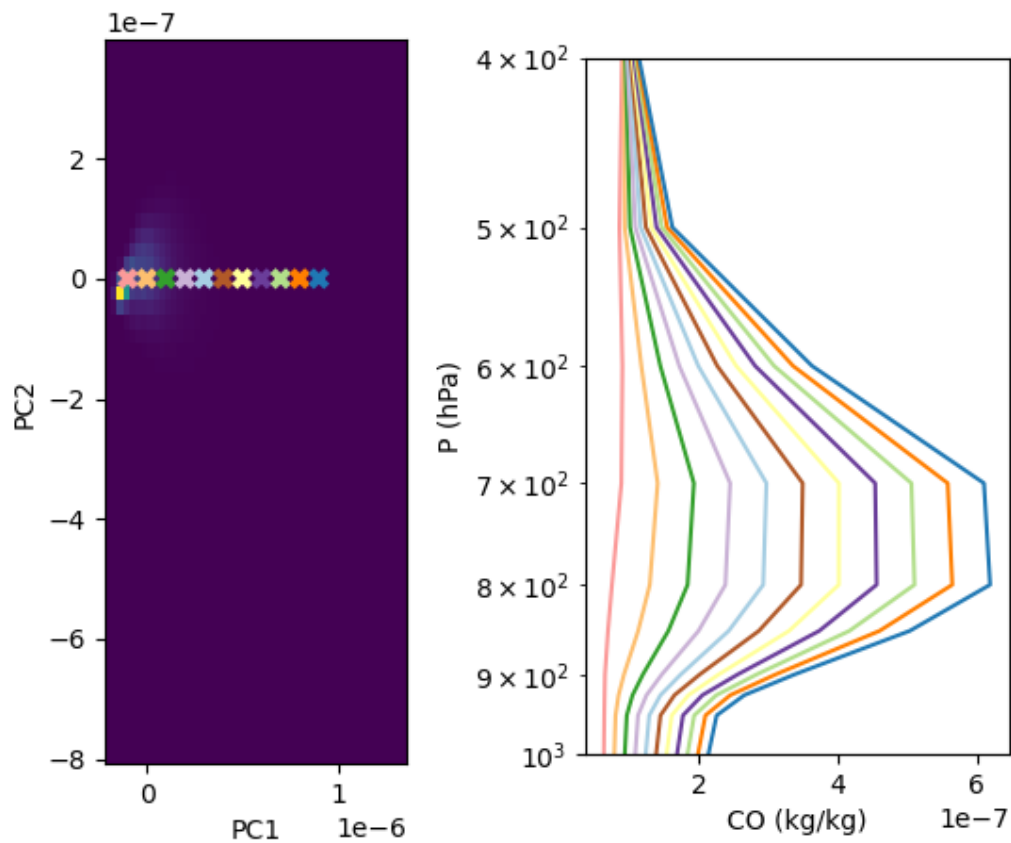

**Figure S10.** ~~Example cross-section~~ As in Figure S8 but the right panel illustrates the variability of ~~carbon monoxide~~ the first principal component of the CO profiles ~~across PC1~~, which is largely showing the variation in ~~total~~ the magnitude of the column CO concentration.

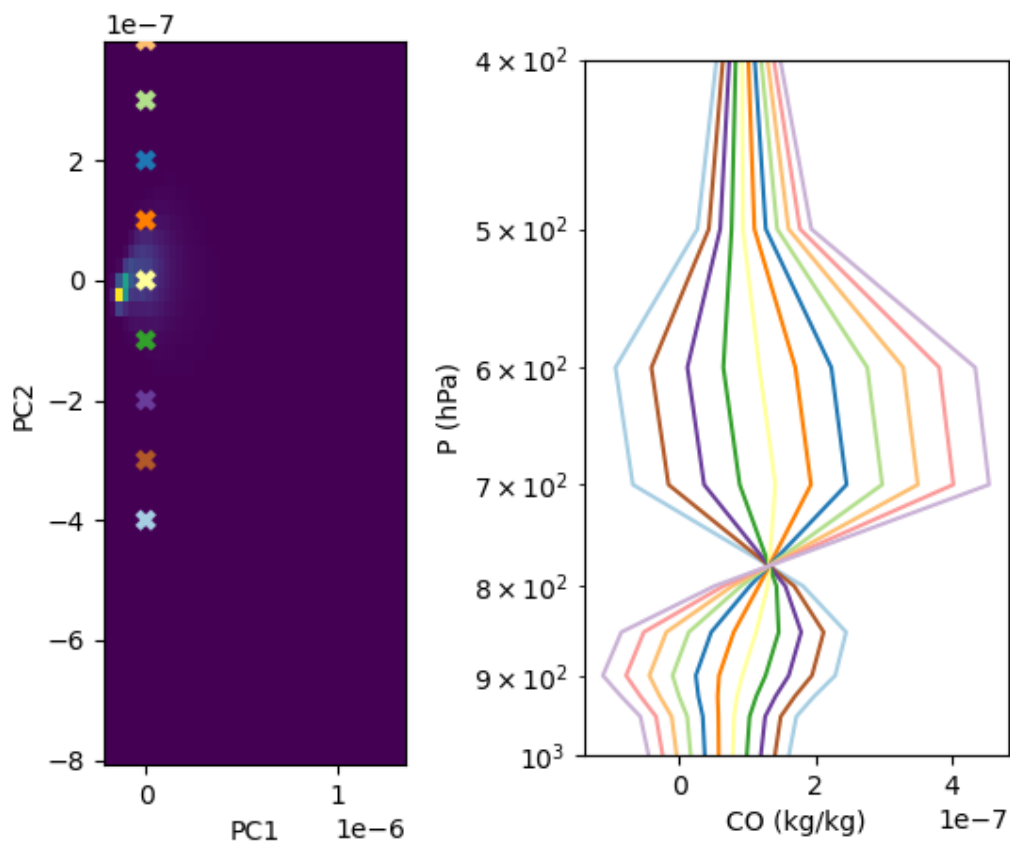

**Figure S11.** ~~Example cross-section~~ As in Figure S10 but the right panel illustrates the variability of ~~carbon monoxide~~ the second principal component of the CO profiles ~~across PC2~~, showing how which is capturing the variations in upper-level CO concentration between the 500 and 800 hPa pressure levels relative to the lower-level CO ~~varies along this component~~ concentration below the 800 hPa pressure level.
